# Supplementary material for: Genetic studies on continuous flowering in woody plant Osmanthus fragrans
Source: Front Plant Sci. 2022 Nov 3;13:1049479. doi: 10.3389/fpls.2022.1049479 (PMC9671776; doi:10.3389/fpls.2022.1049479)
Supplement: Supplementary file 4 [file Table_1.xlsx]

## Sheet: Sheet2
Lists of primers used in the study
primers for real time PCR in O. fragrans
genes	sequence
OfACT-FW	CCCAAGGCAAACAGAGAAAAAAT
OfACT-RV	ACCCCATCACCAGAATCAAGAA
OfFT-FW	CAAGCCCAAGTGATCCCAACCT
OfFT-RV	GCCGGAATAACACGAAAACGAA
OfBFT-FW	ATTGTTGGGAGAGTGATAGGAGATG
OfBFT-RV	CTAGTGGTGACTGTGGAGGGATAG
OfTFL1-FW	TAAAATGTCGGTCACTTACAACTCC
OfTFL1-RV	ACCTCCATGAACCTCAACCCTA
primers for real time PCR in A. thaliana
genes	sequence
AtACT-FW	CCAAGCATAGGGATACATAGGTT
AtACT-RV	GACAGGGAGACCAAGATCATACT
AtAP1-FW	GTTCGAGATCATTCCTCCTCA
AtAP1-RV	GTTCGAGATCATTCCTCCTCA
AtLFY-FW	GAGGTAGTGGTTTGGGGACA
AtLFY-RV	TGTTTATGTAACTCGCTCCTGA
primers for transgenic plants
genes	sequence
pORER4-OfFT-FW	ggatccATGTCTAGAGACAGAGACCC
pORER4-OfFT-RV	gaattcCTGTCTTCGTCCGCCGG
pORER4-OfBFT-FW	ggatccATGGCAAGAGTATTAGAACCCT
pORER4-OfBFT-RV	gaattcTGCGTCTTCGTGCAGCCGTGTCT
primers for yeast one-hybrid
genes	sequence
AD-OfSPL8-FW	catatgATGGTGGACTATGAATGGGGGA
AD-OfSPL8-RV	ggatccTCAGTAAAAAATTGTGCTTGTTG
pHis2-proFT-FW	gagctcAATTGATGAGTACGGTGAA
pHis2-proFT-RV	ccgcggACTTTAGGGATTGACGATTT
pHis2-proBFT-FW	gagctcGCTCTATGTTCCGCATTTTA
pHis2-proBFT-RV	ccgcggAGAAGACACTCAAGAGGGATTT
primers for transient assay
pGreen0800II-proBFT-FW	ggtaccGCTCTATGTTCCGCATTTTA
pGreen0800II-proBFT-RV	ctcgagAGAAGACACTCAAGAGGGATTT
pGreen0800II-proFT-FW	ggtaccGCTCTATGTTCCGCATTTTA
pGreen0800II-proFT-RV	ctcgagAGAAGACACTCAAGAGGGATTT
