# Supplementary material for: Genetic studies on continuous flowering in woody plant Osmanthus fragrans
Source: Front Plant Sci. 2022 Nov 3;13:1049479. doi: 10.3389/fpls.2022.1049479 (PMC9671776; doi:10.3389/fpls.2022.1049479)
Supplement: Supplementary file 6 [file Table_3.xls]

## Sheet: Sheet1
	number	rate (%)
Total Unigenes	94529	1
Nr	45945	0.486
Swissport	30114	0.3186
KOG	25807	0.273
Kegg	20065	0.2123
