# Supplementary material for: Genetic studies on continuous flowering in woody plant Osmanthus fragrans
Source: Front Plant Sci. 2022 Nov 3;13:1049479. doi: 10.3389/fpls.2022.1049479 (PMC9671776; doi:10.3389/fpls.2022.1049479)
Supplement: Supplementary file 7 [file Table_4.xlsx]

## Sheet: WS-S0-VS-WS-S1.path
KEGG_A_class	KEGG_B_class	Pathway	DF-S0-VS-DF-S1 (643)	All (10895)	Pvalue	Qvalue	Pathway ID	Genes	K_IDs
Metabolism	Carbohydrate metabolism	Galactose metabolism	29	148	8.05128e-09	9.74205e-07	ko00052	Unigene0000204;Unigene0003942;Unigene0006243;Unigene0008897;Unigene0024414;Unigene0024415;Unigene0026922;Unigene0028936;Unigene0033271;Unigene0037653;Unigene0038450;Unigene0041391;Unigene0043126;Unigene0044722;Unigene0053348;Unigene0054161;Unigene0054736;Unigene0061192;Unigene0063134;Unigene0063135;Unigene0064830;Unigene0064831;Unigene0065538;Unigene0066879;Unigene0070184;Unigene0075416;Unigene00…	K12447+K18819+K18819+K12447+K18819+K18819+K12447+K12447+K18819+K06617+K06617+K00850+K06617+K06617+K12447+K00844+K06611+K06617+K18819+K18819+K01193+K01193+K07407+K06617+K01187+K12447+K06617+K01193+K06617
Organismal Systems	Environmental adaptation	Plant-pathogen interaction	70	616	6.45447e-08	3.90496e-06	ko04626	Unigene0000355;Unigene0000812;Unigene0003193;Unigene0004803;Unigene0006620;Unigene0007498;Unigene0007571;Unigene0007936;Unigene0008549;Unigene0010003;Unigene0010892;Unigene0013901;Unigene0014015;Unigene0014361;Unigene0015447;Unigene0016563;Unigene0018095;Unigene0018443;Unigene0018836;Unigene0021504;Unigene0022387;Unigene0022608;Unigene0023091;Unigene0024499;Unigene0024970;Unigene0028704;Unigene00…	K09422+K13457+K13459+K13420+K09422+K13459+K13449+K13459+K09422+K13448+K13459+K09422+K09422+K05391+K13447+K13420+K09422+K13420+K13448+K04079+K09422+K13448+K13447+K09422+K13448+K15397+K04079+K13457+K13448+K13412+K09422+K13456+K09422+K13412+K13448+K13448+K02183+K13449+K13448+K09422+K02183+K02183+K13457+K09422+K09422+K09422+K13447+K13459+K13457+K13449+K18835+K13448+K15397+K15397+K13457+K13459+K13459+…
Metabolism	Biosynthesis of other secondary metabolites	Phenylpropanoid biosynthesis	35	252	1.84076e-06	5.62108e-05	ko00940	Unigene0001190;Unigene0003738;Unigene0004415;Unigene0008248;Unigene0010406;Unigene0013243;Unigene0014290;Unigene0015583;Unigene0023278;Unigene0025699;Unigene0036489;Unigene0040602;Unigene0043304;Unigene0046610;Unigene0047346;Unigene0048395;Unigene0048396;Unigene0054012;Unigene0054020;Unigene0054914;Unigene0055487;Unigene0055488;Unigene0056642;Unigene0059651;Unigene0059753;Unigene0062281;Unigene00…	K13065+K00430+K13065+K01188+K01188+K00430+K01188+K00430+K00083+K01188+K00430+K05350+K00430+K01188+K00430+K00083+K00083+K01188+K00430+K00083+K01188+K01188+K01188+K05350+K22395+K00083+K00083+K00430+K01188+K01188+K11188+K13065+K00430+K00430+K00083
Metabolism	Carbohydrate metabolism	Pentose and glucuronate interconversions	25	149	1.85821e-06	5.62108e-05	ko00040	Unigene0000204;Unigene0003652;Unigene0008380;Unigene0008897;Unigene0012132;Unigene0025252;Unigene0026057;Unigene0026922;Unigene0027506;Unigene0028936;Unigene0036916;Unigene0045819;Unigene0047777;Unigene0048429;Unigene0048895;Unigene0050105;Unigene0050106;Unigene0050418;Unigene0053348;Unigene0054118;Unigene0056379;Unigene0068415;Unigene0075416;Unigene0076104;Unigene0080307	K12447+K01728+K01213+K12447+K01051+K01051+K01213+K12447+K01051+K12447+K01051+K01184+K01728+K00002+K01728+K01051+K01051+K01051+K12447+K01728+K01184+K01728+K12447+K01213+K01728
Metabolism	Metabolism of other amino acids	Cyanoamino acid metabolism	16	104	0.000368079	0.00890752	ko00460	Unigene0008099;Unigene0008248;Unigene0010406;Unigene0014290;Unigene0015917;Unigene0015918;Unigene0025699;Unigene0040602;Unigene0046610;Unigene0054012;Unigene0055487;Unigene0055488;Unigene0056642;Unigene0059651;Unigene0071068;Unigene0073210	K12153+K01188+K01188+K01188+K00600+K00600+K01188+K05350+K01188+K01188+K01188+K01188+K01188+K05350+K01188+K01188
Metabolism	Metabolism of terpenoids and polyketides	Carotenoid biosynthesis	10	53	0.000925486	0.018664	ko00906	Unigene0014965;Unigene0028001;Unigene0047529;Unigene0047530;Unigene0066720;Unigene0066721;Unigene0066722;Unigene0066723;Unigene0083824;Unigene0087606	K15747+K09840+K09840+K09840+K09843+K09843+K09843+K09843+K09840+K09843
Environmental Information Processing	Signal transduction	MAPK signaling pathway - plant	33	318	0.00110186	0.0190464	ko04016	Unigene0000587;Unigene0002707;Unigene0003712;Unigene0004803;Unigene0007571;Unigene0009291;Unigene0009998;Unigene0011409;Unigene0015447;Unigene0016563;Unigene0018443;Unigene0023091;Unigene0024005;Unigene0028050;Unigene0034620;Unigene0039412;Unigene0040435;Unigene0042186;Unigene0042187;Unigene0043472;Unigene0045769;Unigene0046497;Unigene0047339;Unigene0047459;Unigene0050830;Unigene0052106;Unigene00…	K14497+K20717+K14509+K13420+K13449+K20714+K14515+K14515+K13447+K13420+K13420+K13447+K14514+K00940+K03781+K02183+K13449+K02183+K02183+K13447+K14509+K13449+K14509+K17686+K14515+K20535+K03781+K20547+K13420+K20772+K17686+K20553+K14497
Metabolism	Carbohydrate metabolism	Starch and sucrose metabolism	27	270	0.00500977	0.0707688	ko00500	Unigene0002255;Unigene0008248;Unigene0010406;Unigene0014290;Unigene0025699;Unigene0036163;Unigene0040602;Unigene0046610;Unigene0053205;Unigene0054012;Unigene0054161;Unigene0055487;Unigene0055488;Unigene0056642;Unigene0057422;Unigene0058982;Unigene0059651;Unigene0061921;Unigene0062989;Unigene0064197;Unigene0064830;Unigene0064831;Unigene0070184;Unigene0071068;Unigene0073210;Unigene0075351;Unigene00…	K01179+K01188+K01188+K01188+K01188+K01179+K05350+K01188+K01087+K01188+K00844+K01188+K01188+K01188+K01087+K01179+K05350+K00695+K00700+K01179+K01193+K01193+K01187+K01188+K01188+K00705+K01193
Metabolism	Biosynthesis of other secondary metabolites	Isoquinoline alkaloid biosynthesis	7	37	0.0052638	0.0707688	ko00950	Unigene0010817;Unigene0028392;Unigene0042658;Unigene0060132;Unigene0062109;Unigene0069199;Unigene0093779	K01593+K00815+K00422+K00422+K00276+K00422+K14455
Metabolism	Metabolism of terpenoids and polyketides	Zeatin biosynthesis	7	40	0.00818095	0.0989895	ko00908	Unigene0008842;Unigene0011036;Unigene0020385;Unigene0024429;Unigene0036518;Unigene0051109;Unigene0051110	K00279+K10760+K10760+K10760+K00279+K13495+K13495
Metabolism	Carbohydrate metabolism	Ascorbate and aldarate metabolism	15	132	0.0109402	0.120342	ko00053	Unigene0000204;Unigene0008897;Unigene0011184;Unigene0015289;Unigene0026922;Unigene0028936;Unigene0042541;Unigene0042907;Unigene0051441;Unigene0052448;Unigene0052449;Unigene0052450;Unigene0053348;Unigene0075416;Unigene0093958	K12447+K12447+K00128+K00469+K12447+K12447+K00423+K00128+K00128+K00469+K00469+K00469+K12447+K12447+K00128
Environmental Information Processing	Membrane transport	ABC transporters	14	128	0.0186077	0.175707	ko02010	Unigene0014742;Unigene0026557;Unigene0026558;Unigene0037091;Unigene0040189;Unigene0049942;Unigene0050637;Unigene0053185;Unigene0073502;Unigene0073537;Unigene0073538;Unigene0074522;Unigene0075562;Unigene0088694	K05643+K05641+K05643+K05681+K05658+K05666+K05643+K05658+K05666+K05658+K05658+K05643+K05658+K05658
Metabolism	Global and overview maps	Biosynthesis of secondary metabolites	154	2246	0.0188776	0.175707	ko01110	Unigene0000173;Unigene0001190;Unigene0001325;Unigene0002479;Unigene0003242;Unigene0003437;Unigene0003738;Unigene0004415;Unigene0004677;Unigene0005366;Unigene0005632;Unigene0005837;Unigene0005883;Unigene0005954;Unigene0008099;Unigene0008248;Unigene0010360;Unigene0010406;Unigene0010817;Unigene0011036;Unigene0011184;Unigene0011634;Unigene0011946;Unigene0012056;Unigene0012752;Unigene0013243;Unigene00…	K01115+K13065+K02437+K03527+K13260+K01115+K00430+K13065+K00162+K21371+K13600+K00021+K21374+K21374+K12153+K01188+K00036+K01188+K01593+K10760+K00128+K20659+K01115+K01590+K00162+K00430+K12742+K21354+K13081+K01696+K00873+K01188+K10527+K15747+K00430+K00600+K00600+K15095+K10760+K01696+K01115+K00083+K10760+K08081+K01188+K20623+K01963+K09840+K00940+K00815+K15397+K00232+K03781+K11752+K01626+K00430+K01638+…
Metabolism	Metabolism of terpenoids and polyketides	Brassinosteroid biosynthesis	5	32	0.0378044	0.304956	ko00905	Unigene0026276;Unigene0062596;Unigene0062648;Unigene0062650;Unigene0089990	K20623+K20623+K15639+K15639+K15639
Metabolism	Biosynthesis of other secondary metabolites	Tropane, piperidine and pyridine alkaloid biosynthesis	5	32	0.0378044	0.304956	ko00960	Unigene0025535;Unigene0028392;Unigene0062109;Unigene0087596;Unigene0093779	K08081+K00815+K00276+K08081+K14455
Metabolism	Biosynthesis of other secondary metabolites	Isoflavonoid biosynthesis	2	7	0.0599167	0.426896	ko00943	Unigene0003242;Unigene0051989	K13260+K13260
Metabolism	Biosynthesis of other secondary metabolites	Stilbenoid, diarylheptanoid and gingerol biosynthesis	4	26	0.0639625	0.426896	ko00945	Unigene0001190;Unigene0004415;Unigene0081060;Unigene0093802	K13065+K13065+K13065+K16040
Metabolism	Amino acid metabolism	Phenylalanine, tyrosine and tryptophan biosynthesis	9	86	0.0663098	0.426896	ko00400	Unigene0014115;Unigene0021231;Unigene0028392;Unigene0036094;Unigene0055206;Unigene0066739;Unigene0076903;Unigene0084784;Unigene0093779	K01696+K01696+K00815+K01626+K15227+K00891+K15227+K01657+K14455
Environmental Information Processing	Signal transduction	Plant hormone signal transduction	32	412	0.0670332	0.426896	ko04075	Unigene0000587;Unigene0003712;Unigene0006219;Unigene0007117;Unigene0007571;Unigene0009998;Unigene0010765;Unigene0011409;Unigene0015916;Unigene0017190;Unigene0024005;Unigene0029722;Unigene0031312;Unigene0033092;Unigene0034637;Unigene0037965;Unigene0039479;Unigene0040435;Unigene0045369;Unigene0045769;Unigene0046497;Unigene0047339;Unigene0049728;Unigene0050766;Unigene0050830;Unigene0051143;Unigene00…	K14497+K14509+K14492+K14487+K13449+K14515+K14488+K14515+K14488+K14486+K14514+K14488+K13946+K14488+K14488+K14499+K14487+K13449+K14505+K14509+K13449+K14509+K14484+K14484+K14515+K14432+K14431+K14432+K14491+K14486+K14486+K14497
Metabolism	Metabolism of cofactors and vitamins	Nicotinate and nicotinamide metabolism	6	51	0.078266	0.47351	ko00760	Unigene0014780;Unigene0015162;Unigene0045002;Unigene0051382;Unigene0071390;Unigene0071393	K03517+K18551+K18551+K01240+K00763+K00763
Metabolism	Carbohydrate metabolism	Inositol phosphate metabolism	11	120	0.0967246	0.557318	ko00562	Unigene0015289;Unigene0037050;Unigene0045552;Unigene0045553;Unigene0047070;Unigene0052448;Unigene0052449;Unigene0052450;Unigene0067279;Unigene0067282;Unigene0071238	K00469+K19517+K01858+K01858+K00888+K00469+K00469+K00469+K21797+K21797+K21797
Metabolism	Amino acid metabolism	Alanine, aspartate and glutamate metabolism	11	125	0.119567	0.652885	ko00250	Unigene0000999;Unigene0022384;Unigene0022602;Unigene0036618;Unigene0038967;Unigene0054258;Unigene0055981;Unigene0063888;Unigene0072573;Unigene0089354;Unigene0093779	K01915+K00261+K00609+K16871+K01915+K01580+K01580+K00261+K00264+K17761+K14455
Metabolism	Lipid metabolism	Cutin, suberine and wax biosynthesis	5	45	0.124102	0.652885	ko00073	Unigene0004731;Unigene0049928;Unigene0057698;Unigene0061591;Unigene0067339	K13356+K15404+K15400+K15404+K17991
Metabolism	Lipid metabolism	Ether lipid metabolism	5	49	0.160904	0.80743	ko00565	Unigene0000173;Unigene0003437;Unigene0011946;Unigene0021343;Unigene0084527	K01115+K01115+K01115+K01115+K01115
Metabolism	Glycan biosynthesis and metabolism	Mannose type O-glycan biosyntheis	1	3	0.166824	0.80743	ko00515	Unigene0018794	K18207
Metabolism	Lipid metabolism	Linoleic acid metabolism	3	25	0.180714	0.841014	ko00591	Unigene0058260;Unigene0064768;Unigene0064770	K15718+K00454+K00454
Organismal Systems	Environmental adaptation	Circadian rhythm - plant	7	81	0.200521	0.870802	ko04712	Unigene0014839;Unigene0053633;Unigene0056212;Unigene0064470;Unigene0064471;Unigene0068950;Unigene0072968	K12130+K10143+K16240+K12133+K12133+K12130+K03097
Metabolism	Glycan biosynthesis and metabolism	Glycosylphosphatidylinositol(GPI)-anchor biosynthesis	5	53	0.201508	0.870802	ko00563	Unigene0003728;Unigene0007700;Unigene0062773;Unigene0065151;Unigene0069161	K03434+K05310+K03434+K03861+K05310
Metabolism	Metabolism of terpenoids and polyketides	Sesquiterpenoid and triterpenoid biosynthesis	3	27	0.211468	0.882333	ko00909	Unigene0011634;Unigene0041812;Unigene0059469	K20659+K14173+K14175
Metabolism	Carbohydrate metabolism	Butanoate metabolism	5	56	0.23398	0.91774	ko00650	Unigene0007211;Unigene0036618;Unigene0054258;Unigene0055981;Unigene0089354	K18121+K16871+K01580+K01580+K17761
Metabolism	Amino acid metabolism	Tyrosine metabolism	7	85	0.235124	0.91774	ko00350	Unigene0010817;Unigene0028392;Unigene0042658;Unigene0060132;Unigene0062109;Unigene0069199;Unigene0093779	K01593+K00815+K00422+K00422+K00276+K00422+K14455
Genetic Information Processing	Replication and repair	Mismatch repair	8	102	0.253839	0.955814	ko03430	Unigene0015820;Unigene0017283;Unigene0029778;Unigene0034853;Unigene0041539;Unigene0043939;Unigene0055012;Unigene0082606	K07466+K10756+K10756+K07466+K07466+K07466+K07466+K04802
Metabolism	Amino acid metabolism	Arginine biosynthesis	6	73	0.260676	0.955814	ko00220	Unigene0000999;Unigene0022384;Unigene0038967;Unigene0063888;Unigene0074706;Unigene0093779	K01915+K00261+K01915+K00261+K14682+K14455
Metabolism	Biosynthesis of other secondary metabolites	Flavonoid biosynthesis	4	45	0.273594	0.973672	ko00941	Unigene0001190;Unigene0004415;Unigene0013930;Unigene0081060	K13065+K13065+K13081+K13065
Metabolism	Glycan biosynthesis and metabolism	Other types of O-glycan biosynthesis	4	46	0.286993	0.975538	ko00514	Unigene0064171;Unigene0066309;Unigene0066310;Unigene0075479	K09667+K20782+K20782+K09667
Metabolism	Energy metabolism	Nitrogen metabolism	7	91	0.290243	0.975538	ko00910	Unigene0000999;Unigene0022384;Unigene0035082;Unigene0038967;Unigene0063888;Unigene0072573;Unigene0080480	K01915+K00261+K01674+K01915+K00261+K00264+K02575
Metabolism	Metabolism of terpenoids and polyketides	Diterpenoid biosynthesis	3	33	0.30857	0.976196	ko00904	Unigene0033843;Unigene0043862;Unigene0049275	K17982+K17961+K04120
Metabolism	Metabolism of other amino acids	Taurine and hypotaurine metabolism	2	19	0.310065	0.976196	ko00430	Unigene0054258;Unigene0055981	K01580+K01580
Metabolism	Amino acid metabolism	Histidine metabolism	5	64	0.326151	0.976196	ko00340	Unigene0011184;Unigene0012056;Unigene0042907;Unigene0051441;Unigene0093958	K00128+K01590+K00128+K00128+K00128
Metabolism	Glycan biosynthesis and metabolism	Other glycan degradation	4	49	0.327655	0.976196	ko00511	Unigene0017588;Unigene0059982;Unigene0074681;Unigene0085935	K01191+K01191+K01191+K12373
Metabolism	Lipid metabolism	Glycerolipid metabolism	12	174	0.330777	0.976196	ko00561	Unigene0008740;Unigene0011184;Unigene0042907;Unigene0048429;Unigene0051441;Unigene0051890;Unigene0052234;Unigene0059552;Unigene0065538;Unigene0066883;Unigene0074047;Unigene0093958	K00679+K00128+K00128+K00002+K00128+K13509+K00655+K03715+K07407+K21362+K00901+K00128
Genetic Information Processing	Translation	Aminoacyl-tRNA biosynthesis	9	129	0.351572	0.989307	ko00970	Unigene0014791;Unigene0036111;Unigene0052616;Unigene0064277;Unigene0068341;Unigene0070487;Unigene0071374;Unigene0073865;Unigene0073866	K01889+K01881+K01873+K01892+K04567+K01889+K01893+K01869+K01869
Genetic Information Processing	Replication and repair	DNA replication	9	129	0.351572	0.989307	ko03030	Unigene0015820;Unigene0017283;Unigene0029778;Unigene0034853;Unigene0041539;Unigene0043939;Unigene0055012;Unigene0069695;Unigene0082606	K07466+K10756+K10756+K07466+K07466+K07466+K07466+K02541+K04802
Metabolism	Amino acid metabolism	Glycine, serine and threonine metabolism	8	116	0.377434	0.999741	ko00260	Unigene0001325;Unigene0014115;Unigene0015917;Unigene0015918;Unigene0021231;Unigene0030167;Unigene0048017;Unigene0062109	K02437+K01696+K00600+K00600+K01696+K00058+K15919+K00276
Metabolism	Carbohydrate metabolism	Amino sugar and nucleotide sugar metabolism	17	262	0.378484	0.999741	ko00520	Unigene0000204;Unigene0008349;Unigene0008897;Unigene0023594;Unigene0026922;Unigene0028936;Unigene0040973;Unigene0046361;Unigene0051034;Unigene0053348;Unigene0054161;Unigene0054588;Unigene0071686;Unigene0073167;Unigene0075416;Unigene0085935;Unigene0092601	K12447+K05305+K12447+K01183+K12447+K12447+K01183+K00972+K01809+K12447+K00844+K20547+K13648+K13648+K12447+K12373+K01183
Metabolism	Metabolism of other amino acids	beta-Alanine metabolism	8	118	0.395647	0.999741	ko00410	Unigene0011184;Unigene0042907;Unigene0051441;Unigene0054258;Unigene0055981;Unigene0062109;Unigene0065321;Unigene0093958	K00128+K00128+K00128+K01580+K01580+K00276+K05605+K00128
Metabolism	Glycan biosynthesis and metabolism	Glycosphingolipid biosynthesis - globo and isoglobo series	2	23	0.397257	0.999741	ko00603	Unigene0065538;Unigene0085935	K07407+K12373
Metabolism	Global and overview maps	Metabolic pathways	251	4196	0.404529	0.999741	ko01100	Unigene0000173;Unigene0000204;Unigene0000999;Unigene0001190;Unigene0001325;Unigene0001397;Unigene0002255;Unigene0002479;Unigene0003437;Unigene0003728;Unigene0003738;Unigene0004415;Unigene0004677;Unigene0005150;Unigene0005632;Unigene0005837;Unigene0005883;Unigene0005954;Unigene0006060;Unigene0007083;Unigene0007211;Unigene0008248;Unigene0008349;Unigene0008380;Unigene0008740;Unigene0008897;Unigene00…	K01115+K12447+K01915+K13065+K02437+K01230+K01179+K03527+K01115+K03434+K00430+K13065+K00162+K01205+K13600+K00021+K21374+K21374+K00148+K00737+K18121+K01188+K05305+K01213+K00679+K12447+K03942+K00036+K01188+K01593+K10760+K00128+K01115+K01590+K01051+K00162+K00430+K00122+K01255+K01696+K00873+K00512+K01188+K02527+K10527+K03006+K03517+K15747+K00430+K00600+K00600+K18207+K00122+K10760+K01696+K01115+K00261+…
Metabolism	Metabolism of cofactors and vitamins	Vitamin B6 metabolism	2	24	0.418296	0.999741	ko00750	Unigene0043920;Unigene0054452	K13248+K00275
Metabolism	Biosynthesis of other secondary metabolites	Betalain biosynthesis	1	9	0.421715	0.999741	ko00965	Unigene0010817	K01593
Metabolism	Metabolism of cofactors and vitamins	One carbon pool by folate	3	40	0.423001	0.999741	ko00670	Unigene0015917;Unigene0015918;Unigene0052968	K00600+K00600+K01938
Environmental Information Processing	Signal transduction	Phosphatidylinositol signaling system	9	140	0.445316	0.999741	ko04070	Unigene0039412;Unigene0042186;Unigene0042187;Unigene0047070;Unigene0060268;Unigene0067279;Unigene0067282;Unigene0071238;Unigene0074047	K02183+K02183+K02183+K00888+K00981+K21797+K21797+K21797+K00901
Genetic Information Processing	Replication and repair	Non-homologous end-joining	1	10	0.455872	0.999741	ko03450	Unigene0064779	K10777
Genetic Information Processing	Replication and repair	Nucleotide excision repair	10	158	0.456844	0.999741	ko03420	Unigene0015820;Unigene0017283;Unigene0029778;Unigene0034853;Unigene0041539;Unigene0043939;Unigene0052591;Unigene0055012;Unigene0082606;Unigene0091030	K07466+K10756+K10756+K07466+K07466+K07466+K03144+K07466+K04802+K10848
Metabolism	Metabolism of terpenoids and polyketides	Monoterpenoid biosynthesis	1	11	0.488015	0.999741	ko00902	Unigene0016899	K15095
Metabolism	Lipid metabolism	Glycerophospholipid metabolism	11	182	0.512361	0.999741	ko00564	Unigene0000173;Unigene0003437;Unigene0011946;Unigene0021343;Unigene0034985;Unigene0046209;Unigene0051890;Unigene0052234;Unigene0060268;Unigene0074047;Unigene0084527	K01115+K01115+K01115+K01115+K06130+K08730+K13509+K00655+K00981+K00901+K01115
Metabolism	Lipid metabolism	alpha-Linolenic acid metabolism	5	81	0.525026	0.999741	ko00592	Unigene0014400;Unigene0032421;Unigene0052335;Unigene0064768;Unigene0064770	K10527+K00232+K10527+K00454+K00454
Metabolism	Metabolism of cofactors and vitamins	Thiamine metabolism	3	49	0.558907	0.999741	ko00730	Unigene0035379;Unigene0058204;Unigene0074190	K00949+K01662+K00939
Metabolism	Lipid metabolism	Steroid biosynthesis	3	50	0.572797	0.999741	ko00100	Unigene0010567;Unigene0048211;Unigene0048708	K01052+K14423+K14424
Metabolism	Glycan biosynthesis and metabolism	Glycosaminoglycan degradation	2	33	0.588016	0.999741	ko00531	Unigene0005150;Unigene0085935	K01205+K12373
Metabolism	Lipid metabolism	Fatty acid biosynthesis	6	105	0.591949	0.999741	ko00061	Unigene0022695;Unigene0026420;Unigene0042739;Unigene0065548;Unigene0087339;Unigene0088083	K01897+K01963+K00059+K10781+K02372+K01897
Metabolism	Carbohydrate metabolism	Glyoxylate and dicarboxylate metabolism	16	281	0.596515	0.999741	ko00630	Unigene0000999;Unigene0001325;Unigene0007211;Unigene0013708;Unigene0015917;Unigene0015918;Unigene0019925;Unigene0034620;Unigene0038967;Unigene0040502;Unigene0040505;Unigene0048017;Unigene0049403;Unigene0053242;Unigene0067498;Unigene0091001	K01915+K02437+K18121+K00122+K00600+K00600+K00122+K03781+K01915+K01638+K01638+K15919+K01601+K03781+K00122+K19269
Metabolism	Biosynthesis of other secondary metabolites	Indole alkaloid biosynthesis	1	15	0.598711	0.999741	ko00901	Unigene0010817	K01593
Metabolism	Biosynthesis of other secondary metabolites	Glucosinolate biosynthesis	1	15	0.598711	0.999741	ko00966	Unigene0008099	K12153
Genetic Information Processing	Folding, sorting and degradation	Sulfur relay system	1	15	0.598711	0.999741	ko04122	Unigene0037541	K12161
Metabolism	Metabolism of terpenoids and polyketides	Terpenoid backbone biosynthesis	7	124	0.603301	0.999741	ko00900	Unigene0002479;Unigene0005837;Unigene0013320;Unigene0023098;Unigene0041080;Unigene0058204;Unigene0074116	K03527+K00021+K12742+K15889+K00787+K01662+K03527
Metabolism	Glycan biosynthesis and metabolism	Glycosphingolipid biosynthesis - ganglio series	1	16	0.622426	0.999741	ko00604	Unigene0085935	K12373
Metabolism	Lipid metabolism	Fatty acid degradation	10	182	0.638457	0.999741	ko00071	Unigene0011184;Unigene0014400;Unigene0022695;Unigene0032421;Unigene0042907;Unigene0043384;Unigene0051441;Unigene0052335;Unigene0088083;Unigene0093958	K00128+K10527+K01897+K00232+K00128+K07425+K00128+K10527+K01897+K00128
Metabolism	Metabolism of cofactors and vitamins	Biotin metabolism	2	39	0.679163	0.999741	ko00780	Unigene0042739;Unigene0087339	K00059+K02372
Metabolism	Amino acid metabolism	Tryptophan metabolism	9	172	0.692958	0.999741	ko00380	Unigene0010817;Unigene0011184;Unigene0034620;Unigene0042907;Unigene0045398;Unigene0047817;Unigene0051441;Unigene0053242;Unigene0093958	K01593+K00128+K03781+K00128+K11816+K11816+K00128+K03781+K00128
Metabolism	Amino acid metabolism	Arginine and proline metabolism	7	138	0.713238	0.999741	ko00330	Unigene0011184;Unigene0042907;Unigene0043442;Unigene0051441;Unigene0066610;Unigene0093779;Unigene0093958	K00128+K00128+K00472+K00128+K01611+K14455+K00128
Genetic Information Processing	Replication and repair	Base excision repair	3	62	0.717069	0.999741	ko03410	Unigene0052258;Unigene0070776;Unigene0082606	K01246+K10773+K04802
Metabolism	Carbohydrate metabolism	Pyruvate metabolism	15	286	0.719708	0.999741	ko00620	Unigene0004677;Unigene0011184;Unigene0012752;Unigene0014211;Unigene0026420;Unigene0040502;Unigene0040505;Unigene0042907;Unigene0043773;Unigene0051441;Unigene0058785;Unigene0064677;Unigene0066221;Unigene0074969;Unigene0093958	K00162+K00128+K00162+K00873+K01963+K01638+K01638+K00128+K00162+K00128+K00873+K00162+K01679+K00029+K00128
Metabolism	Amino acid metabolism	Lysine degradation	6	130	0.786864	0.999741	ko00310	Unigene0011184;Unigene0042907;Unigene0048729;Unigene0051441;Unigene0068230;Unigene0093958	K00128+K00128+K11423+K00128+K14157+K00128
Metabolism	Metabolism of cofactors and vitamins	Riboflavin metabolism	1	26	0.794741	0.999741	ko00740	Unigene0035123	K11752
Metabolism	Amino acid metabolism	Phenylalanine metabolism	4	93	0.806774	0.999741	ko00360	Unigene0010817;Unigene0028392;Unigene0062109;Unigene0093779	K01593+K00815+K00276+K14455
Metabolism	Lipid metabolism	Fatty acid elongation	3	73	0.81333	0.999741	ko00062	Unigene0028704;Unigene0049509;Unigene0049510	K15397+K15397+K15397
Metabolism	Carbohydrate metabolism	Fructose and mannose metabolism	6	135	0.815773	0.999741	ko00051	Unigene0008349;Unigene0041391;Unigene0051034;Unigene0054161;Unigene0058850;Unigene0068793	K05305+K00850+K01809+K00844+K00895+K01623
Cellular Processes	Transport and catabolism	Endocytosis	20	402	0.817779	0.999741	ko04144	Unigene0000173;Unigene0003437;Unigene0008144;Unigene0011946;Unigene0012282;Unigene0016787;Unigene0021343;Unigene0041820;Unigene0042659;Unigene0051340;Unigene0051894;Unigene0056989;Unigene0057854;Unigene0058515;Unigene0069821;Unigene0074748;Unigene0074750;Unigene0084527;Unigene0088144;Unigene0088686	K01115+K01115+K19476+K01115+K04646+K12193+K01115+K03283+K12492+K03283+K18443+K07904+K12493+K03283+K12471+K03283+K03283+K01115+K03283+K12199
Metabolism	Glycan biosynthesis and metabolism	N-Glycan biosynthesis	3	77	0.840718	0.999741	ko00510	Unigene0001397;Unigene0007083;Unigene0070505	K01230+K00737+K01228
Metabolism	Global and overview maps	Fatty acid metabolism	9	205	0.861577	0.999741	ko01212	Unigene0014400;Unigene0022695;Unigene0026420;Unigene0032421;Unigene0042739;Unigene0052335;Unigene0065548;Unigene0087339;Unigene0088083	K10527+K01897+K01963+K00232+K00059+K10527+K10781+K02372+K01897
Metabolism	Metabolism of other amino acids	Selenocompound metabolism	2	60	0.876883	0.999741	ko00450	Unigene0062895;Unigene0076174	K00384+K08247
Genetic Information Processing	Replication and repair	Homologous recombination	5	128	0.880875	0.999741	ko03440	Unigene0015820;Unigene0034853;Unigene0041539;Unigene0043939;Unigene0055012	K07466+K07466+K07466+K07466+K07466
Genetic Information Processing	Translation	Ribosome	56	1090	0.885715	0.999741	ko03010	Unigene0001083;Unigene0009800;Unigene0014229;Unigene0019431;Unigene0019562;Unigene0022983;Unigene0025202;Unigene0029848;Unigene0036537;Unigene0036661;Unigene0038258;Unigene0040032;Unigene0040265;Unigene0040747;Unigene0042640;Unigene0043260;Unigene0045094;Unigene0045607;Unigene0046405;Unigene0048779;Unigene0049313;Unigene0050963;Unigene0053755;Unigene0062196;Unigene0062588;Unigene0069574;Unigene00…	K02987+K02984+K02951+K02930+K02896+K02943+K02922+K02967+K02908+K02880+K02872+K02947+K02957+K02894+K02877+K02962+K02871+K02981+K02888+K02939+K02868+K02932+K02955+K02920+K02865+K02977+K02886+K02930+K02991+K02894+K02873+K02912+K02937+K02987+K02980+K02898+K02966+K02941+K02984+K02949+K02969+K02941+K02998+K02940+K02877+K02943+K02936+K02938+K02930+K02866+K02981+K02981+K02887+K02966+K02942+K02977
Metabolism	Carbohydrate metabolism	Glycolysis / Gluconeogenesis	16	353	0.893301	0.999741	ko00010	Unigene0004677;Unigene0011184;Unigene0012752;Unigene0014211;Unigene0041287;Unigene0041391;Unigene0042907;Unigene0043773;Unigene0048429;Unigene0051441;Unigene0054161;Unigene0058785;Unigene0058850;Unigene0064677;Unigene0068793;Unigene0093958	K00162+K00128+K00162+K00873+K00927+K00850+K00128+K00162+K00002+K00128+K00844+K00873+K00895+K00162+K01623+K00128
Genetic Information Processing	Transcription	Basal transcription factors	3	87	0.894444	0.999741	ko03022	Unigene0052591;Unigene0056343;Unigene0091439	K03144+K03122+K03139
Genetic Information Processing	Folding, sorting and degradation	Protein processing in endoplasmic reticulum	28	582	0.894915	0.999741	ko04141	Unigene0001397;Unigene0011435;Unigene0019119;Unigene0021504;Unigene0024817;Unigene0029012;Unigene0032536;Unigene0034573;Unigene0037505;Unigene0037959;Unigene0038477;Unigene0041820;Unigene0048136;Unigene0049204;Unigene0051340;Unigene0058515;Unigene0059692;Unigene0069796;Unigene0070505;Unigene0073612;Unigene0074748;Unigene0074750;Unigene0075669;Unigene0075675;Unigene0075946;Unigene0079616;Unigene00…	K01230+K03347+K09490+K04079+K06689+K04079+K13993+K10666+K10666+K10666+K13993+K03283+K06689+K03094+K03283+K03283+K04079+K14026+K01228+K08057+K03283+K03283+K14005+K14005+K03347+K09503+K08057+K03283
Genetic Information Processing	Translation	Ribosome biogenesis in eukaryotes	7	181	0.91575	0.999741	ko03008	Unigene0010339;Unigene0032228;Unigene0063801;Unigene0072700;Unigene0072968;Unigene0075422;Unigene0076560	K14572+K14552+K14556+K14538+K03097+K14573+K14537
Metabolism	Lipid metabolism	Sphingolipid metabolism	2	68	0.916533	0.999741	ko00600	Unigene0044031;Unigene0065538	K04718+K07407
Metabolism	Lipid metabolism	Arachidonic acid metabolism	1	41	0.917817	0.999741	ko00590	Unigene0043384	K07425
Metabolism	Metabolism of cofactors and vitamins	Folate biosynthesis	1	43	0.927266	0.999741	ko00790	Unigene0034380	K01724
Metabolism	Global and overview maps	Carbon metabolism	37	773	0.929081	0.999741	ko01200	Unigene0001325;Unigene0004677;Unigene0006060;Unigene0007211;Unigene0010360;Unigene0012752;Unigene0013708;Unigene0014211;Unigene0015917;Unigene0015918;Unigene0019925;Unigene0022384;Unigene0026420;Unigene0030167;Unigene0034620;Unigene0040502;Unigene0040505;Unigene0041287;Unigene0041391;Unigene0043773;Unigene0048017;Unigene0049403;Unigene0052968;Unigene0053242;Unigene0054161;Unigene0054183;Unigene00…	K02437+K00162+K00148+K18121+K00036+K00162+K00122+K00873+K00600+K00600+K00122+K00261+K01963+K00058+K03781+K01638+K01638+K00927+K00850+K00162+K15919+K01601+K01938+K03781+K00844+K01057+K00873+K00261+K00855+K00162+K05605+K01679+K00122+K01623+K00029+K19269+K14455
Cellular Processes	Transport and catabolism	Phagosome	8	215	0.943761	0.999741	ko04145	Unigene0023895;Unigene0032623;Unigene0044215;Unigene0057097;Unigene0058777;Unigene0073612;Unigene0077514;Unigene0085747	K05692+K07375+K02150+K08488+K04392+K08057+K02155+K08057
Metabolism	Carbohydrate metabolism	Pentose phosphate pathway	5	150	0.946269	0.999741	ko00030	Unigene0010360;Unigene0041391;Unigene0054183;Unigene0058850;Unigene0068793	K00036+K00850+K01057+K00895+K01623
Cellular Processes	Transport and catabolism	Autophagy - other eukaryotes	3	103	0.947326	0.999741	ko04136	Unigene0017009;Unigene0042298;Unigene0061874	K08330+K07203+K08331
Metabolism	Amino acid metabolism	Valine, leucine and isoleucine degradation	5	152	0.950198	0.999741	ko00280	Unigene0011184;Unigene0042907;Unigene0051441;Unigene0065321;Unigene0093958	K00128+K00128+K00128+K05605+K00128
Metabolism	Metabolism of cofactors and vitamins	Porphyrin and chlorophyll metabolism	2	81	0.956477	0.999741	ko00860	Unigene0005632;Unigene0072117	K13600+K04040
Metabolism	Metabolism of cofactors and vitamins	Pantothenate and CoA biosynthesis	1	54	0.962863	0.999741	ko00770	Unigene0063345	K01922
Metabolism	Energy metabolism	Carbon fixation in photosynthetic organisms	6	190	0.971614	0.999741	ko00710	Unigene0041287;Unigene0049403;Unigene0064345;Unigene0068793;Unigene0074969;Unigene0093779	K00927+K01601+K00855+K01623+K00029+K14455
Cellular Processes	Transport and catabolism	Peroxisome	8	236	0.972011	0.999741	ko04146	Unigene0004731;Unigene0022695;Unigene0032421;Unigene0034620;Unigene0039000;Unigene0053242;Unigene0087873;Unigene0088083	K13356+K01897+K00232+K03781+K04565+K03781+K04565+K01897
Genetic Information Processing	Folding, sorting and degradation	Ubiquitin mediated proteolysis	11	304	0.973883	0.999741	ko04120	Unigene0011435;Unigene0015253;Unigene0019048;Unigene0024817;Unigene0032805;Unigene0043819;Unigene0043822;Unigene0048136;Unigene0049204;Unigene0053633;Unigene0075946	K03347+K10614+K10583+K06689+K10588+K03355+K03355+K06689+K03094+K10143+K03347
Metabolism	Lipid metabolism	Biosynthesis of unsaturated fatty acids	2	93	0.976544	0.999741	ko01040	Unigene0032421;Unigene0042739	K00232+K00059
Metabolism	Metabolism of other amino acids	Glutathione metabolism	6	197	0.978259	0.999741	ko00480	Unigene0010360;Unigene0013803;Unigene0025277;Unigene0035889;Unigene0042758;Unigene0047249	K00036+K01255+K00799+K00799+K00799+K01255
Metabolism	Metabolism of cofactors and vitamins	Ubiquinone and other terpenoid-quinone biosynthesis	1	63	0.978585	0.999741	ko00130	Unigene0028392	K00815
Metabolism	Carbohydrate metabolism	Propanoate metabolism	2	96	0.979945	0.999741	ko00640	Unigene0026420;Unigene0065321	K01963+K05605
Genetic Information Processing	Folding, sorting and degradation	RNA degradation	10	292	0.980971	0.999741	ko03018	Unigene0007999;Unigene0008001;Unigene0012255;Unigene0022667;Unigene0039343;Unigene0041391;Unigene0071093;Unigene0073205;Unigene0080397;Unigene0088001	K12598+K12598+K12608+K13126+K12581+K00850+K04077+K14442+K04077+K12603
Genetic Information Processing	Folding, sorting and degradation	Protein export	2	98	0.981942	0.999741	ko03060	Unigene0019119;Unigene0053541	K09490+K12272
Metabolism	Global and overview maps	2-Oxocarboxylic acid metabolism	3	128	0.983417	0.999741	ko01210	Unigene0008099;Unigene0074706;Unigene0093779	K12153+K14682+K14455
Metabolism	Amino acid metabolism	Cysteine and methionine metabolism	6	207	0.985282	0.999741	ko00270	Unigene0023797;Unigene0028392;Unigene0057072;Unigene0066610;Unigene0070631;Unigene0093779	K00558+K00815+K20772+K01611+K17398+K14455
Metabolism	Global and overview maps	Biosynthesis of amino acids	21	538	0.986655	0.999741	ko01230	Unigene0000999;Unigene0014115;Unigene0014211;Unigene0015917;Unigene0015918;Unigene0021231;Unigene0028392;Unigene0030167;Unigene0036094;Unigene0038967;Unigene0041287;Unigene0041391;Unigene0055206;Unigene0058785;Unigene0066739;Unigene0068793;Unigene0072573;Unigene0074706;Unigene0076903;Unigene0084784;Unigene0093779	K01915+K01696+K00873+K00600+K00600+K01696+K00815+K00058+K01626+K01915+K00927+K00850+K15227+K00873+K00891+K01623+K00264+K14682+K15227+K01657+K14455
Genetic Information Processing	Transcription	Spliceosome	19	506	0.989744	0.999741	ko03040	Unigene0012674;Unigene0019291;Unigene0041820;Unigene0046162;Unigene0046653;Unigene0051340;Unigene0054607;Unigene0058515;Unigene0061435;Unigene0062392;Unigene0062421;Unigene0063770;Unigene0064113;Unigene0068338;Unigene0072480;Unigene0074748;Unigene0074750;Unigene0077491;Unigene0088144	K12885+K12812+K03283+K11099+K12741+K03283+K12836+K03283+K12844+K12836+K12818+K12890+K12891+K12823+K12847+K03283+K03283+K12859+K03283
Metabolism	Energy metabolism	Oxidative phosphorylation	15	422	0.990102	0.999741	ko00190	Unigene0009981;Unigene0016628;Unigene0023917;Unigene0026540;Unigene0029388;Unigene0031520;Unigene0038631;Unigene0044215;Unigene0056718;Unigene0060863;Unigene0065697;Unigene0071957;Unigene0077514;Unigene0081294;Unigene0094026	K03942+K01535+K02133+K01535+K01535+K00416+K03955+K02150+K02126+K03955+K03879+K01507+K02155+K01535+K01535
Genetic Information Processing	Folding, sorting and degradation	SNARE interactions in vesicular transport	1	79	0.991961	0.999741	ko04130	Unigene0057097	K08488
Metabolism	Carbohydrate metabolism	Citrate cycle (TCA cycle)	5	210	0.995486	0.999741	ko00020	Unigene0004677;Unigene0012752;Unigene0043773;Unigene0064677;Unigene0066221	K00162+K00162+K00162+K00162+K01679
Genetic Information Processing	Transcription	RNA polymerase	2	125	0.995741	0.999741	ko03020	Unigene0014490;Unigene0054395	K03006+K03006
Metabolism	Nucleotide metabolism	Pyrimidine metabolism	8	291	0.996343	0.999741	ko00240	Unigene0014490;Unigene0022602;Unigene0028050;Unigene0051382;Unigene0054395;Unigene0073039;Unigene0079856;Unigene0081563	K03006+K00609+K00940+K01240+K03006+K01937+K01520+K00943
Metabolism	Energy metabolism	Photosynthesis	2	135	0.997534	0.999741	ko00195	Unigene0007818;Unigene0070277	K02638+K02689
Genetic Information Processing	Folding, sorting and degradation	Proteasome	2	141	0.998228	0.999741	ko03050	Unigene0028217;Unigene0073617	K02727+K03032
Genetic Information Processing	Translation	mRNA surveillance pathway	6	261	0.998468	0.999741	ko03015	Unigene0019291;Unigene0022667;Unigene0039468;Unigene0053932;Unigene0068561;Unigene0076244	K12812+K13126+K14397+K14376+K14398+K14326
Genetic Information Processing	Translation	RNA transport	13	438	0.998703	0.999741	ko03013	Unigene0004089;Unigene0017912;Unigene0019291;Unigene0022667;Unigene0022825;Unigene0040734;Unigene0055230;Unigene0056140;Unigene0072471;Unigene0074253;Unigene0076244;Unigene0082081;Unigene0093695	K03253+K03231+K12812+K13126+K03231+K03240+K13175+K03231+K03259+K03231+K14326+K18213+K14293
Metabolism	Nucleotide metabolism	Purine metabolism	9	381	0.999741	0.999741	ko00230	Unigene0014211;Unigene0014490;Unigene0028050;Unigene0043572;Unigene0048736;Unigene0054395;Unigene0058785;Unigene0074190;Unigene0076222	K00873+K03006+K00940+K00759+K01490+K03006+K00873+K00939+K01952

## Sheet: AS-S0-VS-AS-S1.path
KEGG_A_class	KEGG_B_class	Pathway	QF-S0-VS-QF-S2 (1685)	All (10895)	Pvalue	Qvalue	Pathway ID	Genes	K_IDs
Metabolism	Amino acid metabolism	Tryptophan metabolism	70	172	8.35952e-16	1.07002e-13	ko00380	Unigene0000377;Unigene0002890;Unigene0003889;Unigene0004189;Unigene0004985;Unigene0006341;Unigene0006880;Unigene0007132;Unigene0010160;Unigene0011183;Unigene0011184;Unigene0012012;Unigene0012699;Unigene0012943;Unigene0012961;Unigene0016509;Unigene0016564;Unigene0016754;Unigene0017361;Unigene0021717;Unigene0022786;Unigene0024099;Unigene0024100;Unigene0025197;Unigene0025198;Unigene0026893;Unigene00…	K01426+K11816+K03782+K00128+K00128+K03781+K11816+K00128+K03782+K03781+K00128+K00128+K11816+K03781+K03782+K03782+K03782+K00128+K03782+K03781+K00816+K03782+K03782+K00252+K00252+K03782+K03782+K00252+K00252+K22450+K01593+K03781+K00128+K03781+K03781+K03782+K03782+K03782+K03781+K03781+K03781+K00128+K03782+K00128+K11816+K00128+K07409+K16903+K00128+K00128+K00128+K00128+K00128+K00128+K03781+K03781+K03781+…
Metabolism	Carbohydrate metabolism	Glyoxylate and dicarboxylate metabolism	88	281	1.13963e-11	6.12644e-10	ko00630	Unigene0000915;Unigene0000999;Unigene0001325;Unigene0001386;Unigene0004587;Unigene0004829;Unigene0004901;Unigene0004907;Unigene0005724;Unigene0006341;Unigene0007148;Unigene0007157;Unigene0007172;Unigene0011183;Unigene0011366;Unigene0012943;Unigene0013368;Unigene0013708;Unigene0014571;Unigene0014907;Unigene0015917;Unigene0015918;Unigene0016026;Unigene0018209;Unigene0020101;Unigene0021717;Unigene00…	K19269+K01915+K02437+K01681+K01681+K15919+K01602+K01681+K01637+K03781+K01455+K01681+K00122+K03781+K01895+K03781+K01647+K00122+K01915+K00281+K00600+K00600+K01647+K00122+K01681+K03781+K00122+K01638+K01915+K01915+K01895+K01895+K11517+K01915+K01915+K01602+K01602+K03781+K03781+K03781+K03781+K00122+K15893+K01895+K01637+K19269+K01681+K01638+K01638+K01638+K01638+K01638+K01638+K00284+K01681+K03781+K03781+…
Metabolism	Energy metabolism	Photosynthesis	53	135	1.43588e-11	6.12644e-10	ko00195	Unigene0002664;Unigene0003257;Unigene0005953;Unigene0007818;Unigene0008069;Unigene0008215;Unigene0009271;Unigene0010556;Unigene0012023;Unigene0013952;Unigene0014083;Unigene0014935;Unigene0015151;Unigene0015223;Unigene0016572;Unigene0016863;Unigene0028252;Unigene0029246;Unigene0030129;Unigene0030130;Unigene0030451;Unigene0031308;Unigene0031338;Unigene0031447;Unigene0035381;Unigene0037461;Unigene00…	K02694+K02707+K02717+K02638+K02690+K02716+K02695+K02708+K02721+K02695+K02110+K02698+K14332+K02641+K02701+K02638+K08905+K02112+K08905+K08905+K02636+K02693+K02695+K08901+K02721+K02113+K02692+K02639+K02639+K02639+K02717+K02693+K02723+K08901+K02111+K02701+K02701+K02115+K02115+K03542+K08903+K08903+K02717+K03541+K02636+K02699+K02703+K02638+K02698+K02639+K08902+K02716+K02109
Metabolism	Global and overview maps	Biosynthesis of secondary metabolites	443	2246	5.84006e-10	1.86882e-08	ko01110	Unigene0000207;Unigene0000300;Unigene0000915;Unigene0001090;Unigene0001325;Unigene0001386;Unigene0001828;Unigene0001849;Unigene0002021;Unigene0002737;Unigene0002939;Unigene0003334;Unigene0003651;Unigene0003738;Unigene0003889;Unigene0004189;Unigene0004351;Unigene0004415;Unigene0004473;Unigene0004587;Unigene0004686;Unigene0004829;Unigene0004907;Unigene0004985;Unigene0005366;Unigene0005646;Unigene00…	K00616+K01610+K19269+K01859+K02437+K01681+K01188+K00895+K03809+K21026+K00616+K00121+K00235+K00430+K03782+K00128+K00640+K13065+K00235+K01681+K01703+K15919+K01681+K00128+K21371+K00234+K01637+K01803+K01114+K21374+K03781+K00083+K00002+K00083+K10258+K00002+K00083+K00128+K07513+K01681+K00134+K14760+K00700+K00134+K18857+K03782+K00083+K10760+K00430+K00549+K10760+K03781+K00128+K00134+K01895+K20659+K00121+…
Genetic Information Processing	Folding, sorting and degradation	Protein processing in endoplasmic reticulum	139	582	3.24736e-08	8.31324e-07	ko04141	Unigene0000531;Unigene0002368;Unigene0003595;Unigene0007733;Unigene0008089;Unigene0008570;Unigene0008571;Unigene0008572;Unigene0008573;Unigene0008575;Unigene0008576;Unigene0008577;Unigene0008578;Unigene0008580;Unigene0008581;Unigene0008582;Unigene0008583;Unigene0008584;Unigene0008585;Unigene0008586;Unigene0008587;Unigene0009129;Unigene0009130;Unigene0010310;Unigene0010580;Unigene0011131;Unigene00…	K03283+K13993+K09490+K04079+K04079+K03283+K03283+K03283+K03283+K03283+K03283+K03283+K03283+K03283+K03283+K03283+K03283+K03283+K03283+K03283+K03283+K04079+K04079+K13993+K04079+K03283+K13993+K09490+K03283+K03283+K09503+K09503+K09503+K03283+K03283+K04079+K03283+K03283+K03283+K13993+K13525+K07151+K08054+K03283+K08054+K08054+K03283+K03283+K09503+K13993+K03283+K03283+K13993+K09517+K03283+K13525+K04079+…
Genetic Information Processing	Translation	Ribosome	230	1090	1.08e-07	2.30401e-06	ko03010	Unigene0000144;Unigene0000690;Unigene0000864;Unigene0001013;Unigene0001059;Unigene0001077;Unigene0001083;Unigene0001466;Unigene0001537;Unigene0001812;Unigene0002033;Unigene0002357;Unigene0002639;Unigene0003842;Unigene0004164;Unigene0004262;Unigene0004305;Unigene0004651;Unigene0005172;Unigene0006057;Unigene0006080;Unigene0006488;Unigene0006680;Unigene0006837;Unigene0007036;Unigene0007745;Unigene00…	K02872+K02880+K02894+K02998+K02949+K02938+K02987+K02917+K02973+K02880+K02924+K02993+K02934+K02985+K02936+K02971+K02975+K02981+K02932+K02983+K02977+K02905+K02881+K02980+K02875+K02991+K02912+K02984+K02870+K02924+K02922+K02910+K02940+K02866+K02964+K02984+K02966+K02896+K02971+K02865+K02866+K02868+K02998+K02998+K02955+K02870+K02969+K02983+K02987+K02958+K02977+K02929+K02883+K02951+K02951+K02953+K02882+…
Organismal Systems	Environmental adaptation	Plant-pathogen interaction	134	616	1.30341e-05	0.000234526	ko04626	Unigene0000355;Unigene0000980;Unigene0002329;Unigene0004762;Unigene0004803;Unigene0004962;Unigene0005758;Unigene0006003;Unigene0007498;Unigene0007733;Unigene0007936;Unigene0008089;Unigene0008296;Unigene0008549;Unigene0009111;Unigene0009129;Unigene0009130;Unigene0010334;Unigene0010580;Unigene0013362;Unigene0013440;Unigene0013901;Unigene0014015;Unigene0014308;Unigene0020118;Unigene0021715;Unigene00…	K09422+K13412+K13459+K13459+K13420+K13420+K13412+K13424+K13459+K04079+K13459+K04079+K09422+K09422+K13449+K04079+K04079+K13448+K04079+K15397+K02183+K09422+K09422+K04079+K15397+K13448+K09422+K15397+K09422+K09422+K09422+K09422+K13449+K13448+K05391+K13448+K04079+K15397+K09422+K13448+K13448+K09422+K15397+K09422+K09422+K09422+K13424+K13424+K09422+K09422+K18835+K09422+K09422+K13448+K04079+K13456+K02183+…
Cellular Processes	Transport and catabolism	Endocytosis	94	402	1.46579e-05	0.000234526	ko04144	Unigene0000531;Unigene0004897;Unigene0008570;Unigene0008571;Unigene0008572;Unigene0008573;Unigene0008575;Unigene0008576;Unigene0008577;Unigene0008578;Unigene0008580;Unigene0008581;Unigene0008582;Unigene0008583;Unigene0008584;Unigene0008585;Unigene0008586;Unigene0008587;Unigene0009532;Unigene0011131;Unigene0012085;Unigene0012086;Unigene0013957;Unigene0014234;Unigene0014639;Unigene0014831;Unigene00…	K03283+K19476+K03283+K03283+K03283+K03283+K03283+K03283+K03283+K03283+K03283+K03283+K03283+K03283+K03283+K03283+K03283+K03283+K07937+K03283+K03283+K03283+K03283+K03283+K03283+K03283+K12471+K03283+K03283+K07887+K03283+K03283+K03283+K03283+K07937+K03283+K03283+K03283+K03283+K12191+K07937+K07904+K01115+K03283+K07937+K03283+K03283+K03283+K03283+K03283+K03283+K03283+K03283+K18443+K03283+K03283+K03283+…
Metabolism	Biosynthesis of other secondary metabolites	Phenylpropanoid biosynthesis	64	252	2.49493e-05	0.000354834	ko00940	Unigene0001828;Unigene0003738;Unigene0004415;Unigene0006483;Unigene0006813;Unigene0007085;Unigene0010260;Unigene0010293;Unigene0013218;Unigene0013567;Unigene0015411;Unigene0016547;Unigene0018311;Unigene0021433;Unigene0021934;Unigene0023783;Unigene0027977;Unigene0029187;Unigene0029358;Unigene0030860;Unigene0031466;Unigene0031856;Unigene0034217;Unigene0036489;Unigene0036534;Unigene0037718;Unigene00…	K01188+K00430+K13065+K00083+K00083+K00083+K00083+K00430+K00083+K00083+K13065+K00083+K01188+K09753+K00083+K00083+K00430+K00083+K00083+K00083+K12356+K00430+K01188+K00430+K00430+K13065+K11188+K11188+K00083+K13066+K13065+K00430+K00430+K01188+K01188+K00083+K00430+K00083+K00430+K09753+K00430+K00430+K00430+K01188+K00083+K00083+K05350+K00430+K01188+K01188+K00083+K00083+K00083+K00083+K05350+K06892+K01188+…
Metabolism	Lipid metabolism	Biosynthesis of unsaturated fatty acids	29	93	0.000102414	0.0013109	ko01040	Unigene0001143;Unigene0001651;Unigene0006836;Unigene0007141;Unigene0011288;Unigene0013544;Unigene0015129;Unigene0023067;Unigene0025343;Unigene0027805;Unigene0031678;Unigene0034080;Unigene0034241;Unigene0039562;Unigene0042737;Unigene0042739;Unigene0044559;Unigene0045945;Unigene0058878;Unigene0058879;Unigene0068498;Unigene0068500;Unigene0068502;Unigene0068503;Unigene0068504;Unigene0068505;Unigene00…	K00507+K03921+K10258+K07513+K00507+K07513+K00232+K00059+K07513+K00059+K10258+K07513+K00232+K10256+K00059+K00059+K10703+K10703+K00507+K00507+K00507+K00507+K00507+K00507+K00507+K00507+K00059+K07513+K10256
Metabolism	Amino acid metabolism	Histidine metabolism	22	64	0.000142941	0.00166331	ko00340	Unigene0004189;Unigene0004985;Unigene0007132;Unigene0011184;Unigene0012012;Unigene0016754;Unigene0031517;Unigene0042907;Unigene0047798;Unigene0048868;Unigene0048943;Unigene0051436;Unigene0051437;Unigene0051438;Unigene0051440;Unigene0051441;Unigene0051442;Unigene0060996;Unigene0060997;Unigene0075444;Unigene0081273;Unigene0094150	K00128+K00128+K00128+K00128+K00128+K00128+K00128+K00128+K00128+K00128+K01590+K00128+K00128+K00128+K00128+K00128+K00128+K00128+K00128+K00128+K00128+K00128
Metabolism	Global and overview maps	Carbon metabolism	156	773	0.000161626	0.00172401	ko01200	Unigene0000207;Unigene0000300;Unigene0000915;Unigene0001325;Unigene0001386;Unigene0002939;Unigene0003334;Unigene0003651;Unigene0004351;Unigene0004473;Unigene0004587;Unigene0004829;Unigene0004901;Unigene0004907;Unigene0005646;Unigene0005724;Unigene0005862;Unigene0006341;Unigene0007148;Unigene0007157;Unigene0007172;Unigene0008680;Unigene0009726;Unigene0011183;Unigene0011320;Unigene0011366;Unigene00…	K00616+K01610+K19269+K02437+K01681+K00616+K00121+K00235+K00640+K00235+K01681+K15919+K01602+K01681+K00234+K01637+K01803+K03781+K01455+K01681+K00122+K00134+K00134+K03781+K00134+K01895+K00121+K03781+K01647+K00122+K01623+K00873+K00281+K00600+K00600+K01647+K00029+K00134+K01610+K00122+K00121+K00058+K01681+K00162+K03781+K00122+K01638+K01895+K01895+K11517+K01689+K00616+K00616+K00616+K00031+K01602+K01602+…
Metabolism	Lipid metabolism	Fatty acid degradation	47	182	0.000188313	0.00185416	ko00071	Unigene0003334;Unigene0004189;Unigene0004985;Unigene0007132;Unigene0007141;Unigene0007684;Unigene0009758;Unigene0011184;Unigene0011692;Unigene0012012;Unigene0013544;Unigene0015129;Unigene0016754;Unigene0017157;Unigene0019275;Unigene0025197;Unigene0025198;Unigene0025343;Unigene0026224;Unigene0026920;Unigene0026921;Unigene0031517;Unigene0031939;Unigene0034080;Unigene0034241;Unigene0042907;Unigene00…	K00121+K00128+K00128+K00128+K07513+K01897+K18857+K00128+K00121+K00128+K07513+K00232+K00128+K00001+K00121+K00252+K00252+K07513+K07425+K00252+K00252+K00128+K18857+K07513+K00232+K00128+K00128+K00128+K00128+K00128+K00128+K00128+K00128+K00128+K01897+K00128+K00128+K01897+K01897+K10527+K01897+K00128+K00626+K00252+K00128+K07513+K00128
Metabolism	Biosynthesis of other secondary metabolites	Flavonoid biosynthesis	17	45	0.00022098	0.00202039	ko00941	Unigene0001090;Unigene0004415;Unigene0013930;Unigene0015411;Unigene0034294;Unigene0037718;Unigene0038762;Unigene0041141;Unigene0042859;Unigene0042860;Unigene0042911;Unigene0044676;Unigene0044767;Unigene0070083;Unigene0078259;Unigene0091899;Unigene0091900	K01859+K13065+K13081+K13065+K01859+K13065+K00475+K13082+K05280+K05280+K13065+K05277+K00660+K22845+K13065+K05278+K05278
Metabolism	Energy metabolism	Photosynthesis - antenna proteins	13	31	0.000367621	0.00313703	ko00196	Unigene0012609;Unigene0013538;Unigene0020993;Unigene0021863;Unigene0039350;Unigene0039353;Unigene0040436;Unigene0042382;Unigene0048744;Unigene0052980;Unigene0052981;Unigene0092973;Unigene0093335	K08910+K08912+K08914+K08913+K08912+K08912+K08914+K08913+K08916+K08917+K08917+K08913+K08913
Metabolism	Amino acid metabolism	Arginine and proline metabolism	36	138	0.000830342	0.00664274	ko00330	Unigene0000377;Unigene0004189;Unigene0004985;Unigene0007132;Unigene0011184;Unigene0012012;Unigene0014240;Unigene0016754;Unigene0023668;Unigene0031517;Unigene0038635;Unigene0042907;Unigene0044652;Unigene0044653;Unigene0046153;Unigene0046862;Unigene0047798;Unigene0048868;Unigene0050985;Unigene0051436;Unigene0051437;Unigene0051438;Unigene0051440;Unigene0051441;Unigene0051442;Unigene0059280;Unigene00…	K01426+K00128+K00128+K00128+K00128+K00128+K01583+K00128+K01611+K00128+K01259+K00128+K00472+K00472+K00797+K17839+K00128+K00128+K01611+K00128+K00128+K00128+K00128+K00128+K00128+K01611+K00128+K00128+K00318+K12259+K00797+K00797+K00128+K01611+K00128+K00128
Metabolism	Carbohydrate metabolism	Glycolysis / Gluconeogenesis	76	353	0.00131344	0.00988946	ko00010	Unigene0000300;Unigene0001849;Unigene0003334;Unigene0004189;Unigene0004985;Unigene0005862;Unigene0006601;Unigene0006975;Unigene0007132;Unigene0008680;Unigene0009726;Unigene0009758;Unigene0011184;Unigene0011320;Unigene0011366;Unigene0011692;Unigene0012012;Unigene0014092;Unigene0014853;Unigene0016357;Unigene0016557;Unigene0016754;Unigene0016980;Unigene0017157;Unigene0019275;Unigene0021073;Unigene00…	K01610+K00895+K00121+K00128+K00128+K01803+K00002+K00002+K00128+K00134+K00134+K18857+K00128+K00134+K01895+K00121+K00128+K01623+K00873+K00134+K00002+K00128+K01610+K00001+K00121+K00162+K01895+K01895+K01689+K00002+K00128+K18857+K00895+K03841+K01895+K01624+K01624+K01624+K01623+K00128+K00162+K00162+K15633+K01610+K01610+K01792+K00128+K00131+K00002+K00128+K00128+K00128+K00128+K00128+K00128+K00128+K00134+…
Metabolism	Carbohydrate metabolism	Ascorbate and aldarate metabolism	34	132	0.00144588	0.0102818	ko00053	Unigene0004189;Unigene0004985;Unigene0007132;Unigene0011184;Unigene0012012;Unigene0015289;Unigene0016754;Unigene0031432;Unigene0031517;Unigene0037597;Unigene0038065;Unigene0042907;Unigene0044677;Unigene0044703;Unigene0045134;Unigene0047798;Unigene0048868;Unigene0051436;Unigene0051437;Unigene0051438;Unigene0051440;Unigene0051441;Unigene0051442;Unigene0052092;Unigene0052306;Unigene0052449;Unigene00…	K00128+K00128+K00128+K00128+K00128+K00469+K00128+K00469+K00128+K00012+K00469+K00128+K14190+K21888+K08232+K00128+K00128+K00128+K00128+K00128+K00128+K00128+K00128+K00012+K10047+K00469+K00469+K12447+K00434+K00128+K00128+K00128+K00128+K00128
Cellular Processes	Transport and catabolism	Peroxisome	54	236	0.0015735	0.0106005	ko04146	Unigene0006341;Unigene0007141;Unigene0007684;Unigene0008151;Unigene0011183;Unigene0012943;Unigene0013544;Unigene0015129;Unigene0021717;Unigene0024251;Unigene0024778;Unigene0025343;Unigene0027117;Unigene0030482;Unigene0031261;Unigene0033984;Unigene0034080;Unigene0034241;Unigene0034467;Unigene0034620;Unigene0034622;Unigene0035861;Unigene0039000;Unigene0039001;Unigene0042732;Unigene0042733;Unigene00…	K03781+K07513+K01897+K04565+K03781+K03781+K07513+K00232+K03781+K04564+K11517+K07513+K00031+K04565+K03781+K04565+K07513+K00232+K04565+K03781+K03781+K03781+K04565+K04565+K03781+K03781+K13354+K13354+K04565+K04565+K04565+K04565+K11147+K03426+K01897+K03781+K03781+K03781+K03781+K01897+K01897+K13348+K11517+K04565+K04565+K01897+K04564+K11517+K00031+K13354+K07513+K03781+K11517+K04564
Metabolism	Carbohydrate metabolism	Pyruvate metabolism	63	286	0.00184375	0.0113601	ko00620	Unigene0000300;Unigene0004189;Unigene0004985;Unigene0007132;Unigene0011184;Unigene0011366;Unigene0012012;Unigene0014853;Unigene0016135;Unigene0016754;Unigene0016980;Unigene0021073;Unigene0022791;Unigene0024658;Unigene0024659;Unigene0028367;Unigene0031517;Unigene0033744;Unigene0033745;Unigene0039194;Unigene0040328;Unigene0040499;Unigene0040500;Unigene0040501;Unigene0040502;Unigene0040505;Unigene00…	K01610+K00128+K00128+K00128+K00128+K01895+K00128+K00873+K00029+K00128+K01610+K00162+K01638+K01895+K01895+K11262+K00128+K01759+K01759+K01895+K01595+K01638+K01638+K01638+K01638+K01638+K01638+K00128+K00162+K00162+K01638+K01638+K01638+K02160+K01610+K01610+K00128+K00128+K01006+K00128+K00128+K00128+K00128+K00128+K00128+K00873+K02160+K00873+K00873+K00102+K00128+K00128+K00382+K00051+K00873+K01961+K00128+…
Metabolism	Carbohydrate metabolism	Pentose and glucuronate interconversions	37	149	0.00186377	0.0113601	ko00040	Unigene0001320;Unigene0006601;Unigene0006975;Unigene0013189;Unigene0013442;Unigene0016557;Unigene0019909;Unigene0025252;Unigene0027006;Unigene0027506;Unigene0029535;Unigene0031081;Unigene0031777;Unigene0033680;Unigene0033713;Unigene0037597;Unigene0043616;Unigene0047777;Unigene0048206;Unigene0048207;Unigene0048429;Unigene0048895;Unigene0050418;Unigene0052092;Unigene0052511;Unigene0053324;Unigene00…	K00963+K00002+K00002+K01051+K00963+K00002+K01051+K01051+K00002+K01051+K01051+K01213+K01728+K01051+K00011+K00012+K01051+K01728+K01728+K01728+K00002+K01728+K01051+K00012+K12447+K01728+K01728+K01728+K01783+K01051+K01728+K01728+K01728+K01728+K01728+K01728+K00008
Metabolism	Metabolism of other amino acids	beta-Alanine metabolism	30	118	0.00329792	0.0191879	ko00410	Unigene0004189;Unigene0004985;Unigene0007132;Unigene0011184;Unigene0012012;Unigene0016754;Unigene0031517;Unigene0042907;Unigene0046153;Unigene0046862;Unigene0047798;Unigene0048868;Unigene0051436;Unigene0051437;Unigene0051438;Unigene0051440;Unigene0051441;Unigene0051442;Unigene0054258;Unigene0054260;Unigene0060996;Unigene0060997;Unigene0061735;Unigene0065145;Unigene0073646;Unigene0073650;Unigene00…	K00128+K00128+K00128+K00128+K00128+K00128+K00128+K00128+K00797+K17839+K00128+K00128+K00128+K00128+K00128+K00128+K00128+K00128+K01580+K01580+K00128+K00128+K00276+K12259+K00797+K00797+K01464+K00128+K00128+K00128
Metabolism	Energy metabolism	Nitrogen metabolism	24	91	0.00493287	0.0274525	ko00910	Unigene0000999;Unigene0007148;Unigene0014571;Unigene0017090;Unigene0024629;Unigene0024631;Unigene0029337;Unigene0029338;Unigene0034749;Unigene0035082;Unigene0040755;Unigene0042936;Unigene0045580;Unigene0049690;Unigene0052296;Unigene0056187;Unigene0058534;Unigene0063888;Unigene0079387;Unigene0080480;Unigene0080750;Unigene0083025;Unigene0090801;Unigene0091802	K01915+K01455+K01915+K10534+K01915+K01915+K01915+K01915+K00261+K01674+K00284+K01674+K01673+K10534+K01673+K01673+K01455+K00261+K02575+K02575+K02575+K01674+K01674+K01915
Metabolism	Lipid metabolism	Glycerolipid metabolism	40	174	0.00548384	0.0292471	ko00561	Unigene0004189;Unigene0004985;Unigene0006601;Unigene0006975;Unigene0007132;Unigene0008740;Unigene0011184;Unigene0012012;Unigene0016557;Unigene0016754;Unigene0027006;Unigene0028912;Unigene0031517;Unigene0031913;Unigene0033713;Unigene0042812;Unigene0042907;Unigene0045783;Unigene0047798;Unigene0048236;Unigene0048237;Unigene0048429;Unigene0048868;Unigene0050413;Unigene0051436;Unigene0051437;Unigene00…	K00128+K00128+K00002+K00002+K00128+K00679+K00128+K00128+K00002+K00128+K00002+K14452+K00128+K01054+K00011+K13508+K00128+K11155+K00128+K00901+K00901+K00002+K00128+K01054+K00128+K00128+K00128+K00128+K00128+K00128+K01054+K00128+K00128+K13508+K13508+K07407+K00128+K00128+K00901+K00128
Metabolism	Global and overview maps	Metabolic pathways	696	4196	0.00574214	0.0293997	ko01100	Unigene0000048;Unigene0000207;Unigene0000300;Unigene0000372;Unigene0000518;Unigene0000915;Unigene0000999;Unigene0001090;Unigene0001320;Unigene0001325;Unigene0001386;Unigene0001524;Unigene0001828;Unigene0001849;Unigene0002664;Unigene0002890;Unigene0002939;Unigene0003227;Unigene0003257;Unigene0003334;Unigene0003651;Unigene0003738;Unigene0003889;Unigene0004189;Unigene0004348;Unigene0004351;Unigene00…	K17761+K00616+K01610+K00912+K15920+K19269+K01915+K01859+K00963+K02437+K01681+K02258+K01188+K00895+K02694+K11816+K00616+K00512+K02707+K00121+K00235+K00430+K03782+K00128+K03006+K00640+K13065+K00235+K01681+K02132+K01703+K15919+K01602+K01681+K00128+K10532+K00234+K01637+K01803+K01114+K02717+K21374+K00083+K00002+K00083+K10258+K11816+K00002+K00083+K00128+K07513+K01681+K00122+K01897+K02690+K02716+K01176+…
Metabolism	Metabolism of terpenoids and polyketides	Carotenoid biosynthesis	15	53	0.0122384	0.0584753	ko00906	Unigene0004027;Unigene0014965;Unigene0016534;Unigene0040847;Unigene0047522;Unigene0047530;Unigene0048646;Unigene0048647;Unigene0057531;Unigene0059076;Unigene0066723;Unigene0066724;Unigene0070373;Unigene0072964;Unigene0080521	K09843+K15747+K09841+K14595+K15744+K09840+K15746+K15746+K09840+K09840+K09843+K09843+K09838+K09842+K09843
Genetic Information Processing	Transcription	Spliceosome	97	506	0.0123346	0.0584753	ko03040	Unigene0000531;Unigene0006208;Unigene0008426;Unigene0008570;Unigene0008571;Unigene0008572;Unigene0008573;Unigene0008575;Unigene0008576;Unigene0008577;Unigene0008578;Unigene0008580;Unigene0008581;Unigene0008582;Unigene0008583;Unigene0008584;Unigene0008585;Unigene0008586;Unigene0008587;Unigene0011131;Unigene0012085;Unigene0012086;Unigene0013957;Unigene0014234;Unigene0014639;Unigene0014831;Unigene00…	K03283+K12891+K11087+K03283+K03283+K03283+K03283+K03283+K03283+K03283+K03283+K03283+K03283+K03283+K03283+K03283+K03283+K03283+K03283+K03283+K03283+K03283+K03283+K03283+K03283+K03283+K03283+K12896+K03283+K03283+K12823+K12823+K03283+K03283+K03283+K03283+K12823+K03283+K03283+K03283+K11099+K03283+K12741+K12741+K03283+K03283+K03283+K03283+K03283+K03283+K03283+K03283+K12837+K03283+K03283+K03283+K03283+…
Metabolism	Amino acid metabolism	Alanine, aspartate and glutamate metabolism	29	125	0.0144226	0.0659318	ko00250	Unigene0000048;Unigene0000999;Unigene0014571;Unigene0018654;Unigene0023745;Unigene0023792;Unigene0024629;Unigene0024631;Unigene0029337;Unigene0029338;Unigene0030751;Unigene0034749;Unigene0035107;Unigene0038430;Unigene0042171;Unigene0047703;Unigene0047705;Unigene0049616;Unigene0049708;Unigene0049709;Unigene0054258;Unigene0054260;Unigene0063888;Unigene0067549;Unigene0074534;Unigene0079446;Unigene00…	K17761+K01915+K01915+K00820+K17761+K17761+K01915+K01915+K01915+K01915+K17761+K00261+K00609+K17761+K17761+K17761+K17761+K14272+K00827+K00827+K01580+K01580+K00261+K01953+K01756+K01939+K17761+K17761+K01915
Metabolism	Lipid metabolism	Cutin, suberine and wax biosynthesis	13	45	0.0159759	0.0705144	ko00073	Unigene0011007;Unigene0011354;Unigene0013629;Unigene0033667;Unigene0043566;Unigene0044962;Unigene0047850;Unigene0049928;Unigene0053668;Unigene0058481;Unigene0061591;Unigene0082372;Unigene0086675	K15403+K15398+K15404+K20769+K15403+K15400+K15403+K15404+K15403+K15398+K15404+K15400+K15403
Metabolism	Global and overview maps	Fatty acid metabolism	43	205	0.0205814	0.0878139	ko01212	Unigene0001143;Unigene0001651;Unigene0006836;Unigene0007141;Unigene0007684;Unigene0011288;Unigene0013544;Unigene0015129;Unigene0020129;Unigene0023067;Unigene0025343;Unigene0027805;Unigene0028367;Unigene0031678;Unigene0034080;Unigene0034241;Unigene0039562;Unigene0042737;Unigene0042739;Unigene0044559;Unigene0044710;Unigene0045945;Unigene0054666;Unigene0056240;Unigene0058878;Unigene0058879;Unigene00…	K00507+K03921+K10258+K07513+K01897+K00507+K07513+K00232+K09458+K00059+K07513+K00059+K11262+K10258+K07513+K00232+K10256+K00059+K00059+K10703+K02160+K10703+K01897+K02160+K00507+K00507+K01897+K01897+K10781+K00507+K00507+K00507+K00507+K00507+K00507+K09458+K10527+K01897+K01961+K00626+K00059+K07513+K10256
Metabolism	Carbohydrate metabolism	Galactose metabolism	32	148	0.028125	0.115343	ko00052	Unigene0001320;Unigene0003942;Unigene0006243;Unigene0013442;Unigene0015519;Unigene0015775;Unigene0024414;Unigene0024415;Unigene0033713;Unigene0037653;Unigene0038421;Unigene0038450;Unigene0039291;Unigene0040520;Unigene0043126;Unigene0044722;Unigene0052511;Unigene0054736;Unigene0058030;Unigene0060112;Unigene0063134;Unigene0063135;Unigene0064820;Unigene0064822;Unigene0064830;Unigene0065535;Unigene00…	K00963+K18819+K18819+K00963+K06617+K06617+K18819+K18819+K00011+K06617+K18819+K06617+K06617+K06617+K06617+K06617+K12447+K06611+K00844+K06611+K18819+K18819+K18819+K01193+K01193+K07407+K06617+K01187+K01835+K06617+K01193+K18819
Metabolism	Biosynthesis of other secondary metabolites	Flavone and flavonol biosynthesis	3	5	0.0289094	0.115343	ko00944	Unigene0038113;Unigene0042859;Unigene0042860	K22794+K05280+K05280
Metabolism	Amino acid metabolism	Glycine, serine and threonine metabolism	26	116	0.029737	0.115343	ko00260	Unigene0001325;Unigene0004829;Unigene0014907;Unigene0015917;Unigene0015918;Unigene0019922;Unigene0021231;Unigene0024000;Unigene0024462;Unigene0036885;Unigene0037783;Unigene0037784;Unigene0043890;Unigene0044659;Unigene0047475;Unigene0048017;Unigene0049616;Unigene0049708;Unigene0049709;Unigene0051492;Unigene0051493;Unigene0060595;Unigene0061735;Unigene0066059;Unigene0073566;Unigene0088896	K02437+K15919+K00281+K00600+K00600+K00058+K01696+K01697+K01758+K15893+K00130+K00130+K15633+K00600+K01733+K15919+K14272+K00827+K00827+K00605+K00605+K06001+K00276+K00382+K00600+K00281
Metabolism	Energy metabolism	Carbon fixation in photosynthetic organisms	39	190	0.036036	0.128899	ko00710	Unigene0000300;Unigene0004901;Unigene0005862;Unigene0008680;Unigene0009726;Unigene0011320;Unigene0014092;Unigene0016135;Unigene0016357;Unigene0016980;Unigene0029478;Unigene0029684;Unigene0038023;Unigene0040328;Unigene0041360;Unigene0041363;Unigene0041364;Unigene0042572;Unigene0043694;Unigene0045471;Unigene0045472;Unigene0049616;Unigene0049932;Unigene0050683;Unigene0051883;Unigene0053162;Unigene00…	K01610+K01602+K01803+K00134+K00134+K00134+K01623+K00029+K00134+K01610+K01602+K01602+K03841+K01595+K01624+K01624+K01624+K01623+K01100+K01610+K01610+K14272+K01006+K05298+K00134+K01623+K01807+K01623+K01783+K01803+K00855+K00855+K00855+K00855+K05298+K00051+K03841+K00026+K01610
Metabolism	Metabolism of cofactors and vitamins	One carbon pool by folate	11	40	0.0362528	0.128899	ko00670	Unigene0015917;Unigene0015918;Unigene0024404;Unigene0044659;Unigene0051492;Unigene0051493;Unigene0052967;Unigene0052968;Unigene0055352;Unigene0073566;Unigene0092020	K00600+K00600+K00602+K00600+K00605+K00605+K01938+K01938+K00297+K00600+K00604
Metabolism	Metabolism of terpenoids and polyketides	Zeatin biosynthesis	11	40	0.0362528	0.128899	ko00908	Unigene0010274;Unigene0011036;Unigene0028303;Unigene0031704;Unigene0043578;Unigene0048021;Unigene0051111;Unigene0051112;Unigene0063295;Unigene0070602;Unigene0077390	K10760+K10760+K13495+K13495+K00279+K13495+K13495+K13495+K13495+K00279+K10760
Metabolism	Lipid metabolism	alpha-Linolenic acid metabolism	19	81	0.0378971	0.131103	ko00592	Unigene0007141;Unigene0009758;Unigene0013544;Unigene0015129;Unigene0016591;Unigene0025343;Unigene0031939;Unigene0034080;Unigene0034241;Unigene0042293;Unigene0044059;Unigene0044060;Unigene0049978;Unigene0056185;Unigene0057449;Unigene0070960;Unigene0073526;Unigene0081680;Unigene0082463	K07513+K18857+K07513+K00232+K05894+K07513+K18857+K07513+K00232+K01047+K10529+K10529+K01723+K10528+K05894+K10527+K00454+K07513+K05894
Metabolism	Amino acid metabolism	Phenylalanine metabolism	21	93	0.0439804	0.148144	ko00360	Unigene0000377;Unigene0003889;Unigene0010160;Unigene0012961;Unigene0016509;Unigene0016564;Unigene0017361;Unigene0024099;Unigene0024100;Unigene0026893;Unigene0026894;Unigene0029603;Unigene0034928;Unigene0034929;Unigene0034930;Unigene0043092;Unigene0061186;Unigene0061188;Unigene0061190;Unigene0061735;Unigene0084043	K01426+K03782+K03782+K03782+K03782+K03782+K03782+K03782+K03782+K03782+K03782+K01593+K03782+K03782+K03782+K03782+K03782+K03782+K03782+K00276+K03782
Metabolism	Amino acid metabolism	Valine, leucine and isoleucine degradation	31	152	0.0608756	0.199797	ko00280	Unigene0004189;Unigene0004985;Unigene0007132;Unigene0007141;Unigene0011184;Unigene0012012;Unigene0013544;Unigene0016754;Unigene0025343;Unigene0031517;Unigene0034080;Unigene0042907;Unigene0047798;Unigene0048868;Unigene0049708;Unigene0049709;Unigene0051436;Unigene0051437;Unigene0051438;Unigene0051440;Unigene0051441;Unigene0051442;Unigene0053740;Unigene0060996;Unigene0060997;Unigene0066059;Unigene00…	K00128+K00128+K00128+K07513+K00128+K00128+K07513+K00128+K07513+K00128+K07513+K00128+K00128+K00128+K00827+K00827+K00128+K00128+K00128+K00128+K00128+K00128+K00020+K00128+K00128+K00382+K00128+K00626+K00128+K07513+K00128
Metabolism	Amino acid metabolism	Lysine degradation	27	130	0.0633255	0.202642	ko00310	Unigene0004189;Unigene0004985;Unigene0007132;Unigene0011184;Unigene0012012;Unigene0016754;Unigene0025197;Unigene0025198;Unigene0026920;Unigene0026921;Unigene0031517;Unigene0042907;Unigene0047798;Unigene0048868;Unigene0051436;Unigene0051437;Unigene0051438;Unigene0051440;Unigene0051441;Unigene0051442;Unigene0060996;Unigene0060997;Unigene0075444;Unigene0078041;Unigene0080959;Unigene0081273;Unigene00…	K00128+K00128+K00128+K00128+K00128+K00128+K00252+K00252+K00252+K00252+K00128+K00128+K00128+K00128+K00128+K00128+K00128+K00128+K00128+K00128+K00128+K00128+K00128+K00626+K00252+K00128+K00128
Metabolism	Biosynthesis of other secondary metabolites	Isoflavonoid biosynthesis	3	7	0.0795616	0.248387	ko00943	Unigene0049007;Unigene0051989;Unigene0051991	K13260+K13260+K13260
Metabolism	Carbohydrate metabolism	Butanoate metabolism	13	56	0.0823332	0.25092	ko00650	Unigene0000048;Unigene0023745;Unigene0023792;Unigene0030751;Unigene0038430;Unigene0042171;Unigene0047703;Unigene0047705;Unigene0054258;Unigene0054260;Unigene0078041;Unigene0085003;Unigene0089354	K17761+K17761+K17761+K17761+K17761+K17761+K17761+K17761+K01580+K01580+K00626+K17761+K17761
Metabolism	Lipid metabolism	Fatty acid elongation	16	73	0.0897617	0.267198	ko00062	Unigene0006836;Unigene0013362;Unigene0020118;Unigene0023232;Unigene0030626;Unigene0031678;Unigene0033077;Unigene0039556;Unigene0041379;Unigene0044559;Unigene0045945;Unigene0048857;Unigene0049509;Unigene0053458;Unigene0054367;Unigene0056588	K10258+K15397+K15397+K15397+K15397+K10258+K15397+K15397+K15397+K10703+K10703+K15397+K15397+K15397+K15397+K15397
Metabolism	Metabolism of terpenoids and polyketides	Sesquiterpenoid and triterpenoid biosynthesis	7	27	0.111577	0.324589	ko00909	Unigene0011634;Unigene0016370;Unigene0025742;Unigene0029614;Unigene0064352;Unigene0065756;Unigene0067779	K20659+K00511+K15803+K00801+K00801+K15803+K00511
Metabolism	Metabolism of other amino acids	Selenocompound metabolism	13	60	0.126301	0.359257	ko00450	Unigene0010952;Unigene0013796;Unigene0019660;Unigene0021243;Unigene0022786;Unigene0024462;Unigene0032715;Unigene0039430;Unigene0056033;Unigene0056036;Unigene0060539;Unigene0060541;Unigene0086565	K00549+K00549+K00549+K22182+K00816+K01758+K00549+K13811+K00549+K00549+K13811+K13811+K00549
Metabolism	Biosynthesis of other secondary metabolites	Indole alkaloid biosynthesis	4	15	0.191818	0.533754	ko00901	Unigene0002737;Unigene0029603;Unigene0051087;Unigene0059288	K21026+K01593+K21026+K21026
Metabolism	Biosynthesis of other secondary metabolites	Stilbenoid, diarylheptanoid and gingerol biosynthesis	6	26	0.204112	0.555878	ko00945	Unigene0004415;Unigene0015411;Unigene0036657;Unigene0037718;Unigene0042911;Unigene0078259	K13065+K13065+K16040+K13065+K13065+K13065
Metabolism	Metabolism of other amino acids	Glutathione metabolism	35	197	0.209002	0.55734	ko00480	Unigene0004662;Unigene0005345;Unigene0008985;Unigene0012714;Unigene0014555;Unigene0024626;Unigene0025277;Unigene0025650;Unigene0027117;Unigene0028125;Unigene0029346;Unigene0033645;Unigene0035889;Unigene0035935;Unigene0036015;Unigene0037846;Unigene0039371;Unigene0039590;Unigene0041227;Unigene0044703;Unigene0046153;Unigene0046273;Unigene0050474;Unigene0053443;Unigene0055735;Unigene0056768;Unigene00…	K00432+K00799+K00799+K00799+K00799+K11140+K00799+K00799+K00031+K00799+K00799+K21456+K00799+K00799+K00799+K00033+K00799+K00799+K00799+K21888+K00797+K00799+K00033+K00799+K00799+K00799+K00799+K00434+K00797+K00797+K10807+K01469+K00031+K00799+K00432
Metabolism	Metabolism of cofactors and vitamins	Biotin metabolism	8	39	0.248027	0.639074	ko00780	Unigene0020129;Unigene0023067;Unigene0026449;Unigene0027805;Unigene0042737;Unigene0042739;Unigene0069072;Unigene0080829	K09458+K00059+K01012+K00059+K00059+K00059+K09458+K00059
Metabolism	Metabolism of other amino acids	Cyanoamino acid metabolism	19	104	0.249638	0.639074	ko00460	Unigene0001828;Unigene0007148;Unigene0015917;Unigene0015918;Unigene0018311;Unigene0034217;Unigene0037015;Unigene0044659;Unigene0046610;Unigene0047821;Unigene0054011;Unigene0056318;Unigene0058534;Unigene0060011;Unigene0060012;Unigene0063149;Unigene0073566;Unigene0073781;Unigene0073782	K01188+K01455+K00600+K00600+K01188+K01188+K08248+K00600+K01188+K01188+K01188+K05350+K01455+K01188+K01188+K05350+K00600+K01188+K01188
Metabolism	Biosynthesis of other secondary metabolites	Isoquinoline alkaloid biosynthesis	7	37	0.344793	0.865362	ko00950	Unigene0026919;Unigene0029603;Unigene0036887;Unigene0041870;Unigene0041871;Unigene0042658;Unigene0061735	K00422+K01593+K00422+K00422+K00422+K00422+K00276
Metabolism	Lipid metabolism	Fatty acid biosynthesis	18	105	0.356146	0.876668	ko00061	Unigene0001651;Unigene0007684;Unigene0020129;Unigene0023067;Unigene0027805;Unigene0028367;Unigene0042737;Unigene0042739;Unigene0044710;Unigene0054666;Unigene0056240;Unigene0064863;Unigene0064864;Unigene0065547;Unigene0069072;Unigene0071153;Unigene0072244;Unigene0080829	K03921+K01897+K09458+K00059+K00059+K11262+K00059+K00059+K02160+K01897+K02160+K01897+K01897+K10781+K09458+K01897+K01961+K00059
Metabolism	Metabolism of terpenoids and polyketides	Brassinosteroid biosynthesis	6	32	0.373843	0.8886	ko00905	Unigene0026276;Unigene0029016;Unigene0037908;Unigene0062648;Unigene0062650;Unigene0085477	K20623+K12637+K15639+K15639+K15639+K15639
Metabolism	Carbohydrate metabolism	Pentose phosphate pathway	25	150	0.374878	0.8886	ko00030	Unigene0000207;Unigene0001849;Unigene0002939;Unigene0014092;Unigene0026084;Unigene0026086;Unigene0026821;Unigene0035914;Unigene0037846;Unigene0038023;Unigene0041339;Unigene0041360;Unigene0041363;Unigene0041364;Unigene0042572;Unigene0048182;Unigene0050474;Unigene0053162;Unigene0053468;Unigene0054853;Unigene0056985;Unigene0058850;Unigene0060442;Unigene0081169;Unigene0083766	K00616+K00895+K00616+K01623+K00616+K00616+K00616+K00895+K00033+K03841+K00616+K01624+K01624+K01624+K01623+K00131+K00033+K01623+K01807+K01057+K01623+K00895+K01783+K01835+K03841
Metabolism	Glycan biosynthesis and metabolism	Mannose type O-glycan biosyntheis	1	3	0.395947	0.903862	ko00515	Unigene0018794	K18207
Metabolism	Metabolism of terpenoids and polyketides	Diterpenoid biosynthesis	6	33	0.403406	0.903862	ko00904	Unigene0020461;Unigene0035998;Unigene0043262;Unigene0043862;Unigene0047561;Unigene0081434	K04124+K04125+K04125+K17961+K04125+K04120
Environmental Information Processing	Signal transduction	MAPK signaling pathway - plant	51	318	0.411442	0.903862	ko04016	Unigene0002707;Unigene0003712;Unigene0004803;Unigene0004936;Unigene0004962;Unigene0006003;Unigene0006341;Unigene0009111;Unigene0011183;Unigene0011239;Unigene0012943;Unigene0013440;Unigene0021717;Unigene0025669;Unigene0031194;Unigene0031261;Unigene0034373;Unigene0034620;Unigene0034622;Unigene0035043;Unigene0035124;Unigene0035861;Unigene0037685;Unigene0039412;Unigene0039413;Unigene0040017;Unigene00…	K20717+K14509+K13420+K20716+K13420+K13424+K03781+K13449+K03781+K14496+K03781+K02183+K03781+K13449+K14497+K03781+K20772+K03781+K03781+K13424+K13424+K03781+K20716+K02183+K02183+K00940+K14496+K13425+K02183+K02183+K03781+K03781+K13449+K14496+K17686+K20547+K14497+K13420+K20772+K20772+K03781+K03781+K03781+K03781+K13424+K13424+K20536+K13414+K00940+K03781+K02183
Metabolism	Biosynthesis of other secondary metabolites	Monobactam biosynthesis	3	15	0.416112	0.903862	ko00261	Unigene0039430;Unigene0060539;Unigene0060541	K13811+K13811+K13811
Metabolism	Biosynthesis of other secondary metabolites	Betalain biosynthesis	2	9	0.416624	0.903862	ko00965	Unigene0029603;Unigene0035874	K01593+K15777
Metabolism	Carbohydrate metabolism	Fructose and mannose metabolism	22	135	0.43052	0.916935	ko00051	Unigene0001849;Unigene0005862;Unigene0014092;Unigene0033713;Unigene0035914;Unigene0038023;Unigene0041360;Unigene0041363;Unigene0041364;Unigene0042572;Unigene0043280;Unigene0051034;Unigene0053162;Unigene0054417;Unigene0054419;Unigene0056985;Unigene0058030;Unigene0058850;Unigene0063285;Unigene0083766;Unigene0089304;Unigene0094166	K00895+K01803+K01623+K00011+K00895+K03841+K01624+K01624+K01624+K01623+K19355+K01809+K01623+K19355+K19355+K01623+K00844+K00895+K01803+K03841+K00966+K00008
Metabolism	Energy metabolism	Sulfur metabolism	9	53	0.43701	0.916935	ko00920	Unigene0004351;Unigene0006175;Unigene0039430;Unigene0058235;Unigene0058236;Unigene0058237;Unigene0060539;Unigene0060541;Unigene0063045	K00640+K05907+K13811+K05907+K05907+K05907+K13811+K13811+K00860
Metabolism	Amino acid metabolism	Tyrosine metabolism	14	85	0.44414	0.916935	ko00350	Unigene0003334;Unigene0009758;Unigene0011692;Unigene0017157;Unigene0019275;Unigene0026919;Unigene0029603;Unigene0031939;Unigene0036887;Unigene0041870;Unigene0041871;Unigene0042658;Unigene0061735;Unigene0091276	K00121+K18857+K00121+K00001+K00121+K00422+K01593+K18857+K00422+K00422+K00422+K00422+K00276+K01555
Metabolism	Metabolism of terpenoids and polyketides	Terpenoid backbone biosynthesis	20	124	0.456789	0.928079	ko00900	Unigene0020520;Unigene0023098;Unigene0034835;Unigene0037309;Unigene0041080;Unigene0041568;Unigene0043760;Unigene0049319;Unigene0051153;Unigene0051154;Unigene0053321;Unigene0053570;Unigene0058203;Unigene0061884;Unigene0063821;Unigene0063936;Unigene0063938;Unigene0073328;Unigene0073329;Unigene0078041	K01662+K15889+K12742+K05356+K00787+K00021+K10960+K10960+K00099+K00099+K00021+K00787+K01662+K12742+K00021+K00099+K00099+K00021+K00021+K00626
Organismal Systems	Environmental adaptation	Circadian rhythm - plant	13	81	0.48925	0.973746	ko04712	Unigene0000413;Unigene0002300;Unigene0010840;Unigene0021325;Unigene0030305;Unigene0030306;Unigene0030601;Unigene0044767;Unigene0044825;Unigene0064468;Unigene0064469;Unigene0064471;Unigene0087945	K12130+K10143+K16221+K10143+K16223+K16223+K12126+K00660+K10143+K12133+K12133+K12133+K03115
Metabolism	Carbohydrate metabolism	Inositol phosphate metabolism	19	120	0.49448	0.973746	ko00562	Unigene0005862;Unigene0005925;Unigene0015289;Unigene0019699;Unigene0031432;Unigene0031446;Unigene0038065;Unigene0045554;Unigene0052306;Unigene0052449;Unigene0052450;Unigene0056405;Unigene0063285;Unigene0063370;Unigene0064393;Unigene0064926;Unigene0067282;Unigene0067645;Unigene0068998	K01803+K01114+K00469+K00010+K00469+K05857+K00469+K01858+K10047+K00469+K00469+K00921+K01803+K01765+K00889+K00888+K21797+K01114+K00889
Metabolism	Carbohydrate metabolism	Starch and sucrose metabolism	42	270	0.510059	0.989205	ko00500	Unigene0001320;Unigene0001828;Unigene0008601;Unigene0008973;Unigene0013442;Unigene0015398;Unigene0018311;Unigene0031005;Unigene0034217;Unigene0037535;Unigene0040727;Unigene0044965;Unigene0046610;Unigene0047821;Unigene0048307;Unigene0048723;Unigene0054011;Unigene0056318;Unigene0057421;Unigene0057422;Unigene0057423;Unigene0057879;Unigene0058030;Unigene0058760;Unigene0058982;Unigene0060011;Unigene00…	K00963+K01188+K01176+K00700+K00963+K00975+K01188+K00696+K01188+K01179+K00975+K00696+K01188+K01188+K01087+K19891+K01188+K05350+K01087+K01087+K01087+K13679+K00844+K13679+K01179+K01188+K01188+K00688+K05350+K00975+K00975+K01193+K01193+K00975+K19891+K16055+K13679+K01188+K01188+K01187+K01835+K01193
Metabolism	Lipid metabolism	Steroid biosynthesis	8	50	0.518275	0.989261	ko00100	Unigene0010567;Unigene0016370;Unigene0028913;Unigene0029614;Unigene0048708;Unigene0064352;Unigene0067779;Unigene0077366	K01052+K00511+K01052+K00801+K14424+K00801+K00511+K01052
Metabolism	Metabolism of terpenoids and polyketides	Monoterpenoid biosynthesis	2	11	0.525545	0.989261	ko00902	Unigene0053983;Unigene0058133	K15095+K20979
Metabolism	Lipid metabolism	Linoleic acid metabolism	4	25	0.554966	1	ko00591	Unigene0000287;Unigene0042293;Unigene0050419;Unigene0073526	K15718+K01047+K07409+K00454
Metabolism	Biosynthesis of other secondary metabolites	Caffeine metabolism	1	5	0.568392	1	ko00232	Unigene0050419	K07409
Metabolism	Metabolism of other amino acids	Taurine and hypotaurine metabolism	3	19	0.581176	1	ko00430	Unigene0027888;Unigene0054258;Unigene0054260	K10712+K01580+K01580
Metabolism	Amino acid metabolism	Arginine biosynthesis	11	73	0.587479	1	ko00220	Unigene0000999;Unigene0014571;Unigene0024629;Unigene0024631;Unigene0029337;Unigene0029338;Unigene0034749;Unigene0049616;Unigene0063888;Unigene0074706;Unigene0091802	K01915+K01915+K01915+K01915+K01915+K01915+K00261+K14272+K00261+K14682+K01915
Metabolism	Amino acid metabolism	Cysteine and methionine metabolism	31	207	0.607928	1	ko00270	Unigene0004351;Unigene0010952;Unigene0012666;Unigene0013796;Unigene0019660;Unigene0023668;Unigene0024000;Unigene0024462;Unigene0032715;Unigene0033645;Unigene0034373;Unigene0036438;Unigene0042637;Unigene0045401;Unigene0046153;Unigene0049708;Unigene0049709;Unigene0050985;Unigene0056033;Unigene0056036;Unigene0056696;Unigene0057072;Unigene0057073;Unigene0059280;Unigene0063121;Unigene0071115;Unigene00…	K00640+K00549+K01251+K00549+K00549+K01611+K01697+K01758+K00549+K21456+K20772+K00789+K01762+K00558+K00797+K00827+K00827+K01611+K00549+K00549+K05396+K20772+K20772+K01611+K05933+K01251+K00797+K00797+K01611+K00549+K00026
Environmental Information Processing	Signal transduction	Plant hormone signal transduction	62	412	0.615899	1	ko04075	Unigene0001425;Unigene0001628;Unigene0002281;Unigene0003712;Unigene0003999;Unigene0004955;Unigene0004973;Unigene0005766;Unigene0006983;Unigene0007117;Unigene0007242;Unigene0009111;Unigene0011239;Unigene0012499;Unigene0013140;Unigene0014281;Unigene0015444;Unigene0022017;Unigene0025669;Unigene0029867;Unigene0030465;Unigene0030601;Unigene0030773;Unigene0031194;Unigene0032250;Unigene0032454;Unigene00…	K14431+K14488+K14488+K14509+K16189+K14488+K14484+K14505+K14489+K14487+K14485+K13449+K14496+K14484+K14488+K14486+K14488+K13946+K13449+K14484+K13464+K12126+K14488+K14497+K14488+K14504+K14488+K14488+K13464+K14488+K14504+K14484+K14496+K14504+K14488+K14488+K14488+K13415+K14432+K14484+K13449+K14488+K14496+K14484+K14484+K14503+K14506+K14497+K14431+K14488+K14431+K14486+K14505+K14491+K14431+K14486+K14486+…
Metabolism	Lipid metabolism	Arachidonic acid metabolism	6	41	0.624938	1	ko00590	Unigene0004662;Unigene0026224;Unigene0032896;Unigene0032897;Unigene0042293;Unigene0083928	K00432+K07425+K15730+K15730+K01047+K00432
Metabolism	Metabolism of other amino acids	Phosphonate and phosphinate metabolism	2	14	0.661277	1	ko00440	Unigene0064545;Unigene0064546	K00968+K00968
Metabolism	Carbohydrate metabolism	Citrate cycle (TCA cycle)	30	210	0.712031	1	ko00020	Unigene0000300;Unigene0001386;Unigene0003651;Unigene0004473;Unigene0004587;Unigene0004907;Unigene0005646;Unigene0007157;Unigene0013368;Unigene0016026;Unigene0016980;Unigene0020101;Unigene0021073;Unigene0027117;Unigene0038187;Unigene0039637;Unigene0042715;Unigene0043772;Unigene0043775;Unigene0045471;Unigene0045472;Unigene0064861;Unigene0064862;Unigene0066059;Unigene0075350;Unigene0077944;Unigene00…	K01610+K01681+K00235+K00235+K01681+K01681+K00234+K01681+K01647+K01647+K01610+K01681+K00162+K00031+K01648+K01681+K01681+K00162+K00162+K01610+K01610+K01648+K01648+K00382+K01648+K01681+K00031+K00026+K01610+K00235
Metabolism	Glycan biosynthesis and metabolism	Glycosphingolipid biosynthesis - globo and isoglobo series	3	23	0.713395	1	ko00603	Unigene0040762;Unigene0065535;Unigene0065997	K12373+K07407+K12373
Metabolism	Glycan biosynthesis and metabolism	Glycosphingolipid biosynthesis - ganglio series	2	16	0.733155	1	ko00604	Unigene0040762;Unigene0065997	K12373+K12373
Metabolism	Metabolism of cofactors and vitamins	Riboflavin metabolism	3	26	0.789536	1	ko00740	Unigene0035123;Unigene0038906;Unigene0059476	K11752+K14379+K11752
Genetic Information Processing	Replication and repair	Non-homologous end-joining	1	10	0.813793	1	ko03450	Unigene0013637	K04799
Metabolism	Global and overview maps	Biosynthesis of amino acids	75	538	0.856953	1	ko01230	Unigene0000207;Unigene0000999;Unigene0001386;Unigene0002939;Unigene0004351;Unigene0004587;Unigene0004686;Unigene0004907;Unigene0005862;Unigene0007157;Unigene0008680;Unigene0009726;Unigene0010952;Unigene0011320;Unigene0013368;Unigene0013796;Unigene0014092;Unigene0014571;Unigene0014853;Unigene0015917;Unigene0015918;Unigene0016026;Unigene0016357;Unigene0019660;Unigene0019922;Unigene0020101;Unigene00…	K00616+K01915+K01681+K00616+K00640+K01681+K01703+K01681+K01803+K01681+K00134+K00134+K00549+K00134+K01647+K00549+K01623+K01915+K00873+K00600+K00600+K01647+K00134+K00549+K00058+K01681+K01696+K01697+K01758+K01915+K01915+K01689+K00616+K00616+K00616+K00031+K01915+K01915+K00549+K00789+K01681+K00616+K01624+K01624+K01624+K01623+K01681+K15227+K15633+K00600+K01733+K14272+K00134+K00873+K01623+K01807+K00549+…
Metabolism	Energy metabolism	Oxidative phosphorylation	57	422	0.887059	1	ko00190	Unigene0001022;Unigene0001426;Unigene0001524;Unigene0001552;Unigene0003651;Unigene0004473;Unigene0004628;Unigene0005319;Unigene0005646;Unigene0007673;Unigene0009136;Unigene0010487;Unigene0013857;Unigene0013883;Unigene0014083;Unigene0022293;Unigene0025409;Unigene0027224;Unigene0029246;Unigene0030277;Unigene0030278;Unigene0031761;Unigene0032257;Unigene0033834;Unigene0036028;Unigene0037461;Unigene00…	K01535+K01535+K02258+K01507+K00235+K00235+K02132+K01535+K00234+K01535+K02128+K01507+K02133+K02132+K02110+K03942+K02150+K02146+K02112+K03942+K03942+K01507+K02267+K01507+K02267+K02113+K03942+K02111+K01507+K02134+K02115+K02115+K03940+K01535+K01535+K02133+K03952+K02266+K02261+K01535+K03955+K02133+K02132+K02132+K01535+K01535+K01535+K01535+K01535+K03940+K00413+K02136+K02256+K11353+K02109+K03935+K00235
Environmental Information Processing	Signal transduction	Phosphatidylinositol signaling system	17	140	0.890142	1	ko04070	Unigene0013440;Unigene0014275;Unigene0031446;Unigene0039412;Unigene0039413;Unigene0042186;Unigene0042187;Unigene0048236;Unigene0048237;Unigene0052306;Unigene0056405;Unigene0064393;Unigene0064926;Unigene0067282;Unigene0068998;Unigene0088697;Unigene0093859	K02183+K00981+K05857+K02183+K02183+K02183+K02183+K00901+K00901+K10047+K00921+K00889+K00888+K21797+K00889+K02183+K00901
Metabolism	Biosynthesis of other secondary metabolites	Tropane, piperidine and pyridine alkaloid biosynthesis	3	32	0.891882	1	ko00960	Unigene0037777;Unigene0043188;Unigene0061735	K08081+K08081+K00276
Metabolism	Lipid metabolism	Ether lipid metabolism	5	49	0.894325	1	ko00565	Unigene0005925;Unigene0025025;Unigene0042293;Unigene0043707;Unigene0067645	K01114+K16860+K01047+K01115+K01114
Metabolism	Metabolism of cofactors and vitamins	Porphyrin and chlorophyll metabolism	9	81	0.897408	1	ko00860	Unigene0012795;Unigene0037788;Unigene0043760;Unigene0046088;Unigene0049319;Unigene0050505;Unigene0061803;Unigene0062678;Unigene0063958	K02492+K22013+K10960+K00218+K10960+K22013+K03405+K02492+K03403
Metabolism	Glycan biosynthesis and metabolism	Glycosaminoglycan degradation	3	33	0.903748	1	ko00531	Unigene0005388;Unigene0040762;Unigene0065997	K10532+K12373+K12373
Metabolism	Global and overview maps	2-Oxocarboxylic acid metabolism	15	128	0.907564	1	ko01210	Unigene0001386;Unigene0004587;Unigene0004686;Unigene0004907;Unigene0007157;Unigene0013368;Unigene0016026;Unigene0020101;Unigene0027117;Unigene0039637;Unigene0042715;Unigene0049616;Unigene0074706;Unigene0077944;Unigene0080166	K01681+K01681+K01703+K01681+K01681+K01647+K01647+K01681+K00031+K01681+K01681+K14272+K14682+K01681+K00031
Metabolism	Metabolism of cofactors and vitamins	Folate biosynthesis	4	43	0.916891	1	ko00790	Unigene0033713;Unigene0034380;Unigene0040494;Unigene0043234	K00011+K01724+K01724+K13950
Metabolism	Carbohydrate metabolism	C5-Branched dibasic acid metabolism	1	15	0.919699	1	ko00660	Unigene0004686	K01703
Metabolism	Biosynthesis of other secondary metabolites	Glucosinolate biosynthesis	1	15	0.919699	1	ko00966	Unigene0004686	K01703
Metabolism	Carbohydrate metabolism	Propanoate metabolism	10	96	0.941658	1	ko00640	Unigene0011366;Unigene0024658;Unigene0024659;Unigene0028367;Unigene0039194;Unigene0044710;Unigene0056240;Unigene0066059;Unigene0072244;Unigene0078041	K01895+K01895+K01895+K11262+K01895+K02160+K02160+K00382+K01961+K00626
Metabolism	Metabolism of cofactors and vitamins	Thiamine metabolism	4	49	0.957228	1	ko00730	Unigene0020520;Unigene0049226;Unigene0054999;Unigene0058203	K01662+K00939+K00949+K01662
Genetic Information Processing	Transcription	RNA polymerase	13	125	0.961275	1	ko03020	Unigene0004348;Unigene0009155;Unigene0010301;Unigene0018912;Unigene0019056;Unigene0050458;Unigene0052610;Unigene0054395;Unigene0064059;Unigene0067994;Unigene0074656;Unigene0077027;Unigene0087564	K03006+K03006+K03006+K03010+K03006+K03006+K03006+K03006+K03006+K03006+K03015+K03006+K03019
Metabolism	Lipid metabolism	Glycerophospholipid metabolism	20	182	0.967736	1	ko00564	Unigene0005925;Unigene0014275;Unigene0018854;Unigene0025025;Unigene0028981;Unigene0034985;Unigene0042293;Unigene0042812;Unigene0043707;Unigene0048236;Unigene0048237;Unigene0052287;Unigene0055180;Unigene0059194;Unigene0062099;Unigene0062100;Unigene0064545;Unigene0064546;Unigene0067645;Unigene0093859	K01114+K00981+K18696+K16860+K01517+K06130+K01047+K13508+K01115+K00901+K00901+K06129+K01126+K08730+K13508+K13508+K00968+K00968+K01114+K00901
Metabolism	Carbohydrate metabolism	Amino sugar and nucleotide sugar metabolism	30	262	0.975259	1	ko00520	Unigene0000518;Unigene0001320;Unigene0012523;Unigene0013442;Unigene0015398;Unigene0015479;Unigene0016826;Unigene0018654;Unigene0037597;Unigene0040727;Unigene0040762;Unigene0040973;Unigene0046675;Unigene0051034;Unigene0052086;Unigene0052092;Unigene0052511;Unigene0054588;Unigene0058030;Unigene0058453;Unigene0062417;Unigene0063240;Unigene0063243;Unigene0065465;Unigene0065609;Unigene0065997;Unigene00…	K15920+K00963+K15920+K00963+K00975+K08679+K12449+K00820+K00012+K00975+K12373+K01183+K13648+K01809+K01183+K00012+K12447+K20547+K00844+K01183+K01183+K00975+K00975+K12449+K00975+K12373+K08678+K13648+K01835+K00966
Metabolism	Lipid metabolism	Synthesis and degradation of ketone bodies	1	22	0.975281	1	ko00072	Unigene0078041	K00626
Genetic Information Processing	Folding, sorting and degradation	RNA degradation	34	292	0.975471	1	ko03018	Unigene0000993;Unigene0003076;Unigene0003465;Unigene0012463;Unigene0014257;Unigene0014462;Unigene0015203;Unigene0016290;Unigene0017255;Unigene0025172;Unigene0029675;Unigene0030290;Unigene0030291;Unigene0030772;Unigene0033695;Unigene0034334;Unigene0037178;Unigene0039343;Unigene0048265;Unigene0049845;Unigene0049846;Unigene0049847;Unigene0052247;Unigene0052318;Unigene0070318;Unigene0070319;Unigene00…	K04043+K04043+K04077+K04077+K12598+K04043+K12619+K04077+K04077+K01689+K12591+K04077+K04077+K04043+K12581+K12593+K12581+K12581+K12608+K04043+K04043+K04043+K04077+K12611+K12608+K12608+K13126+K04043+K12617+K04043+K04043+K01689+K12622+K04077
Metabolism	Metabolism of cofactors and vitamins	Vitamin B6 metabolism	1	24	0.982349	1	ko00750	Unigene0047475	K01733
Environmental Information Processing	Membrane transport	ABC transporters	12	128	0.984313	1	ko02010	Unigene0014742;Unigene0016295;Unigene0016940;Unigene0021456;Unigene0031244;Unigene0037091;Unigene0056290;Unigene0063428;Unigene0065916;Unigene0073538;Unigene0073539;Unigene0076166	K05643+K05643+K05658+K05674+K05674+K05681+K05658+K05643+K05643+K05658+K05658+K05658
Metabolism	Lipid metabolism	Sphingolipid metabolism	5	68	0.985926	1	ko00600	Unigene0013495;Unigene0014347;Unigene0065513;Unigene0065535;Unigene0079925	K04713+K00654+K04714+K07407+K04715
Metabolism	Glycan biosynthesis and metabolism	Other glycan degradation	3	49	0.987032	1	ko00511	Unigene0040762;Unigene0052808;Unigene0065997	K12373+K01206+K12373
Metabolism	Metabolism of cofactors and vitamins	Nicotinate and nicotinamide metabolism	3	51	0.990054	1	ko00760	Unigene0029720;Unigene0053537;Unigene0054115	K18551+K03426+K03787
Metabolism	Metabolism of cofactors and vitamins	Ubiquinone and other terpenoid-quinone biosynthesis	4	63	0.99201	1	ko00130	Unigene0002021;Unigene0008872;Unigene0025858;Unigene0028901	K03809+K14760+K03809+K03809
Metabolism	Metabolism of cofactors and vitamins	Pantothenate and CoA biosynthesis	3	54	0.993351	1	ko00770	Unigene0060669;Unigene0063345;Unigene0073857	K01598+K01922+K01464
Metabolism	Amino acid metabolism	Valine, leucine and isoleucine biosynthesis	1	31	0.994572	1	ko00290	Unigene0004686	K01703
Metabolism	Amino acid metabolism	Phenylalanine, tyrosine and tryptophan biosynthesis	6	86	0.994678	1	ko00400	Unigene0021231;Unigene0042806;Unigene0060174;Unigene0060595;Unigene0066739;Unigene0076904	K01696+K15227+K01657+K06001+K00891+K15227
Genetic Information Processing	Folding, sorting and degradation	SNARE interactions in vesicular transport	5	79	0.996162	1	ko04130	Unigene0014256;Unigene0043732;Unigene0045852;Unigene0057097;Unigene0073532	K08493+K08486+K08486+K08488+K08490
Cellular Processes	Transport and catabolism	Autophagy - other eukaryotes	7	103	0.99771	1	ko04136	Unigene0039648;Unigene0039651;Unigene0052211;Unigene0052212;Unigene0052528;Unigene0080529;Unigene0084087	K08341+K08341+K08337+K08337+K07203+K08269+K04382
Genetic Information Processing	Replication and repair	Base excision repair	3	62	0.997782	1	ko03410	Unigene0013637;Unigene0052258;Unigene0059009	K04799+K01246+K01246
Genetic Information Processing	Transcription	Basal transcription factors	5	87	0.998573	1	ko03022	Unigene0053236;Unigene0072418;Unigene0073744;Unigene0074179;Unigene0089232	K10842+K03137+K03130+K03141+K14649
Genetic Information Processing	Replication and repair	Homologous recombination	9	128	0.99882	1	ko03440	Unigene0003136;Unigene0009446;Unigene0034048;Unigene0043939;Unigene0045492;Unigene0050764;Unigene0051547;Unigene0059829;Unigene0061760	K10728+K07466+K10683+K07466+K07466+K07466+K11864+K07466+K10901
Genetic Information Processing	Replication and repair	Mismatch repair	6	102	0.999201	1	ko03430	Unigene0009446;Unigene0043939;Unigene0045492;Unigene0050494;Unigene0050764;Unigene0059829	K07466+K07466+K07466+K10756+K07466+K07466
Cellular Processes	Transport and catabolism	Phagosome	18	215	0.999364	1	ko04145	Unigene0007553;Unigene0012852;Unigene0017373;Unigene0017453;Unigene0018237;Unigene0019806;Unigene0019872;Unigene0019979;Unigene0025409;Unigene0027224;Unigene0048146;Unigene0049452;Unigene0056405;Unigene0057097;Unigene0059700;Unigene0077950;Unigene0086322;Unigene0087878	K05692+K05692+K08054+K05692+K07887+K08054+K07375+K08054+K02150+K02146+K05692+K07375+K00921+K08488+K07374+K04392+K08054+K05692
Metabolism	Nucleotide metabolism	Pyrimidine metabolism	27	291	0.999374	1	ko00240	Unigene0004348;Unigene0009155;Unigene0009621;Unigene0010301;Unigene0018912;Unigene0019056;Unigene0035107;Unigene0035697;Unigene0040017;Unigene0050458;Unigene0052610;Unigene0053369;Unigene0054048;Unigene0054115;Unigene0054395;Unigene0064059;Unigene0064093;Unigene0066550;Unigene0067994;Unigene0068621;Unigene0073857;Unigene0074656;Unigene0075501;Unigene0077027;Unigene0082385;Unigene0084189;Unigene00…	K03006+K03006+K13800+K03006+K03010+K03006+K00609+K01489+K00940+K03006+K03006+K01937+K09903+K03787+K03006+K03006+K01937+K13800+K03006+K00876+K01464+K03015+K10807+K03006+K00940+K16904+K03019
Metabolism	Glycan biosynthesis and metabolism	Other types of O-glycan biosynthesis	1	46	0.999568	1	ko00514	Unigene0075479	K09667
Genetic Information Processing	Folding, sorting and degradation	Protein export	5	98	0.999652	1	ko03060	Unigene0003595;Unigene0011630;Unigene0053541;Unigene0073313;Unigene0086933	K09490+K09490+K12272+K09490+K09490
Metabolism	Glycan biosynthesis and metabolism	N-Glycan biosynthesis	3	77	0.999737	1	ko00510	Unigene0016372;Unigene0064593;Unigene0068718	K07151+K00737+K00902
Genetic Information Processing	Translation	Ribosome biogenesis in eukaryotes	13	181	0.999776	1	ko03008	Unigene0005850;Unigene0013043;Unigene0015203;Unigene0029824;Unigene0032228;Unigene0047348;Unigene0047349;Unigene0061398;Unigene0061558;Unigene0061560;Unigene0072700;Unigene0074349;Unigene0087945	K14568+K07936+K12619+K07178+K14552+K14549+K14549+K14559+K14539+K14539+K14538+K14521+K03115
Genetic Information Processing	Replication and repair	DNA replication	7	129	0.999897	1	ko03030	Unigene0009446;Unigene0013637;Unigene0043939;Unigene0045492;Unigene0050494;Unigene0050764;Unigene0059829	K07466+K04799+K07466+K07466+K10756+K07466+K07466
Metabolism	Nucleotide metabolism	Purine metabolism	35	381	0.99991	1	ko00230	Unigene0004348;Unigene0009155;Unigene0010301;Unigene0014853;Unigene0018912;Unigene0019056;Unigene0024404;Unigene0028981;Unigene0035624;Unigene0039430;Unigene0040017;Unigene0040550;Unigene0049226;Unigene0050458;Unigene0052179;Unigene0052610;Unigene0054115;Unigene0054395;Unigene0055925;Unigene0058785;Unigene0058787;Unigene0060539;Unigene0060541;Unigene0063045;Unigene0064059;Unigene0067994;Unigene00…	K03006+K03006+K03006+K00873+K03010+K03006+K00602+K01517+K00088+K13811+K00940+K14977+K00939+K03006+K00873+K03006+K03787+K03006+K00856+K00873+K00873+K13811+K13811+K00860+K03006+K03006+K00873+K01756+K03015+K10807+K03006+K01939+K01835+K00940+K03019
Genetic Information Processing	Translation	RNA transport	39	438	0.999987	1	ko03013	Unigene0001262;Unigene0001658;Unigene0004832;Unigene0005854;Unigene0010026;Unigene0010028;Unigene0010032;Unigene0010033;Unigene0010034;Unigene0013043;Unigene0016656;Unigene0022613;Unigene0023485;Unigene0036150;Unigene0039159;Unigene0039160;Unigene0039161;Unigene0039179;Unigene0042247;Unigene0042248;Unigene0046974;Unigene0046975;Unigene0049227;Unigene0062840;Unigene0062844;Unigene0070120;Unigene00…	K03257+K03754+K03231+K03113+K03231+K03231+K03231+K03231+K03231+K07936+K03231+K03236+K03236+K03231+K03113+K03113+K03113+K03113+K03231+K03231+K03231+K03231+K03260+K13025+K03257+K14293+K13126+K03231+K03231+K03231+K03231+K03231+K03231+K03250+K03231+K03231+K03231+K03252+K03231
Genetic Information Processing	Replication and repair	Nucleotide excision repair	8	158	0.99999	1	ko03420	Unigene0009446;Unigene0043939;Unigene0045492;Unigene0050494;Unigene0050764;Unigene0053236;Unigene0059829;Unigene0074179	K07466+K07466+K07466+K10756+K07466+K10842+K07466+K03141
Genetic Information Processing	Translation	Aminoacyl-tRNA biosynthesis	3	129	1	1	ko00970	Unigene0071375;Unigene0081536;Unigene0092020	K01893+K01880+K00604
Genetic Information Processing	Translation	mRNA surveillance pathway	11	261	1	1	ko03015	Unigene0039468;Unigene0053709;Unigene0053824;Unigene0053932;Unigene0055922;Unigene0062840;Unigene0068561;Unigene0071174;Unigene0072817;Unigene0072986;Unigene0084087	K14397+K14411+K14405+K14376+K14409+K13025+K14398+K13126+K06965+K13917+K04382
Genetic Information Processing	Folding, sorting and degradation	Proteasome	2	141	1	1	ko03050	Unigene0049074;Unigene0091547	K03063+K03030
Genetic Information Processing	Folding, sorting and degradation	Ubiquitin mediated proteolysis	14	304	1	1	ko04120	Unigene0002300;Unigene0008399;Unigene0019048;Unigene0020266;Unigene0021325;Unigene0037327;Unigene0041724;Unigene0042917;Unigene0044825;Unigene0049680;Unigene0059795;Unigene0076152;Unigene0083434;Unigene0085205	K10143+K10614+K10583+K03363+K10143+K06689+K10576+K06688+K10143+K10684+K10144+K10581+K10590+K03364

## Sheet: AY-S0-VS-AY-S1.path
KEGG_A_class	KEGG_B_class	Pathway	QY-S0-VS-QY-S2 (2251)	All (10895)	Pvalue	Qvalue	Pathway ID	Genes	K_IDs
Genetic Information Processing	Translation	Ribosome	390	1090	1.53886e-34	2.0159e-32	ko03010	Unigene0000144;Unigene0000234;Unigene0000690;Unigene0000864;Unigene0001013;Unigene0001059;Unigene0001083;Unigene0001466;Unigene0001537;Unigene0001812;Unigene0002033;Unigene0002357;Unigene0002639;Unigene0003080;Unigene0003842;Unigene0004164;Unigene0004262;Unigene0004305;Unigene0004651;Unigene0005172;Unigene0005467;Unigene0005689;Unigene0006057;Unigene0006080;Unigene0006321;Unigene0006488;Unigene00…	K02872+K02877+K02880+K02894+K02998+K02949+K02987+K02917+K02973+K02880+K02924+K02993+K02934+K02889+K02985+K02936+K02971+K02975+K02981+K02932+K02921+K02912+K02983+K02977+K02975+K02905+K02980+K02875+K02987+K02991+K02941+K02912+K02984+K02870+K02995+K02936+K02924+K02922+K02910+K02940+K02893+K02976+K02964+K02984+K02966+K02896+K02978+K02901+K02865+K02866+K02868+K02998+K02998+K02893+K02973+K02955+K02870+…
Metabolism	Global and overview maps	Carbon metabolism	264	773	8.21558e-20	5.3812e-18	ko01200	Unigene0000207;Unigene0000300;Unigene0001030;Unigene0001056;Unigene0001386;Unigene0002265;Unigene0002496;Unigene0002939;Unigene0003307;Unigene0003334;Unigene0003474;Unigene0003651;Unigene0004165;Unigene0004473;Unigene0004587;Unigene0004829;Unigene0004901;Unigene0004907;Unigene0005646;Unigene0005724;Unigene0005763;Unigene0005862;Unigene0006341;Unigene0006736;Unigene0007148;Unigene0007157;Unigene00…	K00616+K01610+K00161+K00616+K01681+K00134+K00134+K00616+K01638+K00121+K00033+K00235+K00234+K00235+K01681+K15919+K01602+K01681+K00234+K01637+K03781+K01803+K03781+K01610+K01455+K01681+K00122+K00134+K00134+K00134+K00029+K00029+K00029+K00640+K03781+K01895+K00134+K01895+K00162+K00121+K01647+K00162+K00616+K03781+K01647+K00122+K00031+K01623+K00140+K00873+K00281+K00134+K03781+K01647+K00029+K00029+K00134+…
Metabolism	Amino acid metabolism	Tryptophan metabolism	87	172	1.6933e-18	7.39409e-17	ko00380	Unigene0002890;Unigene0003889;Unigene0004189;Unigene0005763;Unigene0006341;Unigene0006880;Unigene0010160;Unigene0011183;Unigene0011184;Unigene0011547;Unigene0012012;Unigene0012401;Unigene0012699;Unigene0012943;Unigene0012961;Unigene0015733;Unigene0016509;Unigene0016564;Unigene0016754;Unigene0020823;Unigene0021717;Unigene0021763;Unigene0022307;Unigene0023298;Unigene0024040;Unigene0024099;Unigene00…	K11816+K03782+K00128+K03781+K03781+K11816+K03782+K03781+K00128+K03782+K00128+K00128+K11816+K03781+K03782+K03781+K03782+K03782+K00128+K01593+K03781+K00164+K11816+K03781+K00626+K03782+K00128+K00626+K03782+K03782+K00252+K00252+K00128+K00128+K01593+K03781+K00128+K11816+K03781+K03781+K03782+K03782+K03782+K03781+K03781+K03781+K03782+K03782+K03781+K00128+K11816+K07409+K11816+K00128+K00128+K00128+K00128+…
Metabolism	Carbohydrate metabolism	Glyoxylate and dicarboxylate metabolism	121	281	6.71237e-18	2.1983e-16	ko00630	Unigene0000999;Unigene0001386;Unigene0003307;Unigene0004587;Unigene0004829;Unigene0004901;Unigene0004907;Unigene0005724;Unigene0005763;Unigene0006341;Unigene0007148;Unigene0007157;Unigene0007172;Unigene0007671;Unigene0011183;Unigene0011285;Unigene0011366;Unigene0011784;Unigene0012943;Unigene0013368;Unigene0013708;Unigene0014907;Unigene0015733;Unigene0016026;Unigene0018041;Unigene0018209;Unigene00…	K01915+K01681+K01638+K01681+K15919+K01602+K01681+K01637+K03781+K03781+K01455+K01681+K00122+K01915+K03781+K01895+K01895+K01647+K03781+K01647+K00122+K00281+K03781+K01647+K01913+K00122+K01895+K01637+K01681+K01681+K01681+K00122+K03781+K00122+K01681+K01915+K03781+K01681+K00626+K15919+K01915+K01915+K01895+K01895+K11517+K00626+K01895+K01895+K00122+K01915+K01915+K01602+K01602+K03781+K01915+K00026+K03781+…
Metabolism	Global and overview maps	Biosynthesis of secondary metabolites	597	2246	1.77218e-14	4.6431e-13	ko01110	Unigene0000207;Unigene0000256;Unigene0000300;Unigene0001030;Unigene0001056;Unigene0001090;Unigene0001386;Unigene0001607;Unigene0001849;Unigene0001953;Unigene0002021;Unigene0002265;Unigene0002496;Unigene0002737;Unigene0002939;Unigene0003307;Unigene0003334;Unigene0003474;Unigene0003651;Unigene0003738;Unigene0003889;Unigene0004165;Unigene0004189;Unigene0004415;Unigene0004473;Unigene0004545;Unigene00…	K00616+K05894+K01610+K00161+K00616+K01859+K01681+K01188+K00895+K09840+K03809+K00134+K00134+K21026+K00616+K01638+K00121+K00033+K00235+K00430+K03782+K00234+K00128+K13065+K00235+K00549+K01681+K15919+K01681+K00940+K00234+K01637+K03781+K01803+K01114+K21374+K03781+K00002+K01610+K00083+K10258+K00002+K21354+K00083+K07513+K07513+K01681+K00083+K00134+K00134+K00700+K00134+K03782+K00083+K00430+K00640+K00549+…
Metabolism	Carbohydrate metabolism	Glycolysis / Gluconeogenesis	131	353	3.5164e-13	7.67747e-12	ko00010	Unigene0000300;Unigene0001030;Unigene0001849;Unigene0002265;Unigene0002496;Unigene0003334;Unigene0004189;Unigene0005862;Unigene0006601;Unigene0006736;Unigene0006975;Unigene0008424;Unigene0008680;Unigene0009034;Unigene0011184;Unigene0011285;Unigene0011320;Unigene0011366;Unigene0011495;Unigene0011692;Unigene0012012;Unigene0012401;Unigene0012752;Unigene0014092;Unigene0014853;Unigene0015573;Unigene00…	K01610+K00161+K00895+K00134+K00134+K00121+K00128+K01803+K00002+K01610+K00002+K00134+K00134+K00134+K00128+K01895+K00134+K01895+K00162+K00121+K00128+K00128+K00162+K01623+K00873+K00134+K00134+K00002+K00128+K00627+K01610+K00844+K00844+K01689+K21071+K01913+K01895+K00121+K00002+K03103+K00121+K01624+K01895+K01895+K00161+K01689+K13953+K00128+K01895+K01895+K00128+K00128+K00002+K00121+K00121+K01624+K00873+…
Metabolism	Lipid metabolism	Biosynthesis of unsaturated fatty acids	44	93	7.30931e-09	1.36789e-07	ko01040	Unigene0001143;Unigene0001651;Unigene0005374;Unigene0006836;Unigene0006897;Unigene0007107;Unigene0007141;Unigene0008421;Unigene0011288;Unigene0013544;Unigene0019161;Unigene0019629;Unigene0023067;Unigene0024038;Unigene0025343;Unigene0027805;Unigene0031678;Unigene0034080;Unigene0034957;Unigene0034958;Unigene0035219;Unigene0036203;Unigene0038821;Unigene0042737;Unigene0045945;Unigene0049239;Unigene00…	K00507+K03921+K00507+K10258+K00059+K07513+K07513+K00059+K00507+K07513+K07513+K00059+K00059+K07513+K07513+K00059+K10258+K07513+K00059+K00059+K07513+K00059+K00507+K00059+K10703+K00507+K00507+K00507+K00507+K00507+K00507+K00507+K00507+K00507+K00059+K07513+K07513+K10251+K10258+K10256+K00507+K10244+K07513+K00059
Metabolism	Carbohydrate metabolism	Pyruvate metabolism	100	286	9.39593e-09	1.53858e-07	ko00620	Unigene0000300;Unigene0001030;Unigene0003307;Unigene0004189;Unigene0006736;Unigene0009232;Unigene0009233;Unigene0009234;Unigene0011184;Unigene0011285;Unigene0011366;Unigene0011495;Unigene0012012;Unigene0012401;Unigene0012752;Unigene0014853;Unigene0016101;Unigene0016135;Unigene0016754;Unigene0016957;Unigene0016980;Unigene0018041;Unigene0019237;Unigene0019966;Unigene0024040;Unigene0024658;Unigene00…	K01610+K00161+K01638+K00128+K01610+K00029+K00029+K00029+K00128+K01895+K01895+K00162+K00128+K00128+K00162+K00873+K00029+K00029+K00128+K00627+K01610+K01913+K01895+K01759+K00626+K01895+K01895+K00161+K11262+K00128+K00626+K01895+K01895+K00128+K00128+K11262+K00873+K00128+K00026+K01610+K01759+K01759+K00026+K01610+K01610+K01610+K01895+K01638+K01638+K01638+K01638+K01638+K01638+K01638+K01638+K02160+K01610+…
Metabolism	Lipid metabolism	Fatty acid degradation	69	182	5.45023e-08	7.93311e-07	ko00071	Unigene0003334;Unigene0004189;Unigene0007107;Unigene0007141;Unigene0007684;Unigene0011184;Unigene0011692;Unigene0012012;Unigene0012401;Unigene0013544;Unigene0016754;Unigene0017416;Unigene0019161;Unigene0019275;Unigene0020713;Unigene0021015;Unigene0021016;Unigene0022212;Unigene0022499;Unigene0022694;Unigene0022695;Unigene0024003;Unigene0024038;Unigene0024040;Unigene0025343;Unigene0025706;Unigene00…	K00121+K00128+K07513+K07513+K01897+K00128+K00121+K00128+K00128+K07513+K00128+K07425+K07513+K00121+K00121+K10527+K10527+K00249+K00249+K01897+K01897+K01897+K07513+K00626+K07513+K13953+K00128+K00626+K07425+K00252+K00252+K00128+K00128+K00249+K00121+K00121+K00128+K07513+K07513+K00121+K07425+K00128+K00128+K00128+K00128+K00128+K00128+K00128+K01897+K01897+K07425+K00128+K00128+K01897+K00626+K01897+K00128+…
Metabolism	Energy metabolism	Carbon fixation in photosynthetic organisms	70	190	1.62314e-07	2.12631e-06	ko00710	Unigene0000300;Unigene0002265;Unigene0002496;Unigene0004901;Unigene0005862;Unigene0006736;Unigene0008424;Unigene0008680;Unigene0009034;Unigene0009232;Unigene0009233;Unigene0009234;Unigene0011320;Unigene0014092;Unigene0015573;Unigene0016101;Unigene0016135;Unigene0016357;Unigene0016980;Unigene0022910;Unigene0028761;Unigene0029478;Unigene0029684;Unigene0032509;Unigene0033428;Unigene0034504;Unigene00…	K01610+K00134+K00134+K01602+K01803+K01610+K00134+K00134+K00134+K00029+K00029+K00029+K00134+K01623+K00134+K00029+K00029+K00134+K01610+K01624+K01624+K01602+K01602+K00026+K01610+K00615+K00026+K01610+K01610+K01610+K03841+K01624+K01624+K01624+K01624+K01624+K01623+K01100+K01610+K01610+K14272+K05298+K00134+K01623+K01623+K01595+K01783+K01803+K00855+K00855+K00855+K00855+K05298+K01623+K00029+K03841+K00029+…
Metabolism	Global and overview maps	Fatty acid metabolism	74	205	1.87922e-07	2.23798e-06	ko01212	Unigene0001143;Unigene0001651;Unigene0005374;Unigene0006836;Unigene0006897;Unigene0007107;Unigene0007141;Unigene0007684;Unigene0008421;Unigene0011288;Unigene0011915;Unigene0013544;Unigene0019161;Unigene0019629;Unigene0020129;Unigene0021015;Unigene0021016;Unigene0022212;Unigene0022499;Unigene0022694;Unigene0022695;Unigene0023067;Unigene0024003;Unigene0024038;Unigene0024040;Unigene0025343;Unigene00…	K00507+K03921+K00507+K10258+K00059+K07513+K07513+K01897+K00059+K00507+K09458+K07513+K07513+K00059+K09458+K10527+K10527+K00249+K00249+K01897+K01897+K00059+K01897+K07513+K00626+K07513+K11262+K00626+K00249+K00059+K11262+K10258+K07513+K00059+K00059+K07513+K00059+K00507+K00059+K02160+K10703+K00507+K00648+K01897+K01897+K00507+K00507+K01897+K10781+K10781+K00626+K00507+K00507+K00507+K00507+K00507+K00507+…
Genetic Information Processing	Folding, sorting and degradation	Protein processing in endoplasmic reticulum	166	582	2.17437e-06	2.37369e-05	ko04141	Unigene0000531;Unigene0002309;Unigene0002368;Unigene0002606;Unigene0003595;Unigene0004175;Unigene0006487;Unigene0006593;Unigene0007733;Unigene0008089;Unigene0008570;Unigene0008571;Unigene0008572;Unigene0008573;Unigene0008574;Unigene0008575;Unigene0008576;Unigene0008577;Unigene0008578;Unigene0008580;Unigene0008581;Unigene0008582;Unigene0008583;Unigene0008585;Unigene0008586;Unigene0008587;Unigene00…	K03283+K10661+K13993+K14006+K09490+K03283+K03283+K09490+K04079+K04079+K03283+K03283+K03283+K03283+K03283+K03283+K03283+K03283+K03283+K03283+K03283+K03283+K03283+K03283+K03283+K03283+K04079+K04079+K03283+K03283+K09503+K10666+K13993+K03347+K09490+K09580+K03283+K03283+K09503+K09503+K09503+K03237+K03283+K03283+K04079+K10956+K03283+K03283+K03283+K13993+K03283+K14004+K10666+K09490+K09503+K09584+K08054+…
Metabolism	Amino acid metabolism	Valine, leucine and isoleucine degradation	56	152	2.74275e-06	2.76384e-05	ko00280	Unigene0004189;Unigene0007107;Unigene0007141;Unigene0011184;Unigene0012012;Unigene0012401;Unigene0013544;Unigene0014236;Unigene0015588;Unigene0016567;Unigene0016754;Unigene0019161;Unigene0022212;Unigene0022499;Unigene0024038;Unigene0024040;Unigene0025343;Unigene0025720;Unigene0026138;Unigene0026958;Unigene0026959;Unigene0027014;Unigene0028257;Unigene0031517;Unigene0032188;Unigene0034080;Unigene00…	K00128+K07513+K07513+K00128+K00128+K00128+K07513+K00140+K00826+K05607+K00128+K07513+K00249+K00249+K07513+K00626+K07513+K00128+K00626+K00128+K00128+K00249+K05605+K00128+K00826+K07513+K07513+K01640+K00128+K01968+K00827+K00128+K00128+K00128+K00128+K00128+K00128+K01969+K00128+K00128+K00382+K00382+K00626+K01641+K00128+K00128+K07513+K00128+K07513+K00128+K00128+K07513+K00626+K00253+K05607+K00128
Metabolism	Carbohydrate metabolism	Pentose phosphate pathway	53	150	2.00273e-05	0.000171493	ko00030	Unigene0000207;Unigene0001056;Unigene0001849;Unigene0002939;Unigene0003474;Unigene0012849;Unigene0014092;Unigene0016541;Unigene0017735;Unigene0022892;Unigene0022910;Unigene0026058;Unigene0026085;Unigene0026086;Unigene0028761;Unigene0034504;Unigene0035914;Unigene0037234;Unigene0037235;Unigene0037844;Unigene0037845;Unigene0037846;Unigene0038023;Unigene0041337;Unigene0041338;Unigene0041339;Unigene00…	K00616+K00616+K00895+K00616+K00033+K00616+K01623+K00033+K21071+K00948+K01624+K00033+K00616+K00616+K01624+K00615+K00895+K00616+K00616+K00033+K00033+K00033+K03841+K00616+K00616+K00616+K01624+K01624+K01624+K01624+K01624+K01623+K00131+K00033+K01623+K01623+K01783+K00895+K01623+K03841+K00948+K01810+K01835+K00615+K01810+K01623+K01624+K00036+K03841+K00616+K01810+K00036+K01624
Metabolism	Carbohydrate metabolism	Citrate cycle (TCA cycle)	69	210	2.07401e-05	0.000171493	ko00020	Unigene0000300;Unigene0001030;Unigene0001386;Unigene0003651;Unigene0004165;Unigene0004473;Unigene0004587;Unigene0004907;Unigene0005646;Unigene0006736;Unigene0007157;Unigene0011495;Unigene0011784;Unigene0012752;Unigene0013368;Unigene0013757;Unigene0016026;Unigene0016957;Unigene0016980;Unigene0020100;Unigene0020101;Unigene0020687;Unigene0021763;Unigene0022393;Unigene0023478;Unigene0024348;Unigene00…	K01610+K00161+K01681+K00235+K00234+K00235+K01681+K01681+K00234+K01610+K01681+K00162+K01647+K00162+K01647+K00031+K01647+K00627+K01610+K01681+K01681+K01681+K00164+K01681+K01681+K00234+K00161+K00031+K00031+K00026+K01610+K00234+K00234+K00235+K01681+K00026+K01610+K01610+K01610+K01648+K01681+K01647+K01681+K01610+K01610+K00627+K00235+K00030+K00162+K01648+K01648+K00658+K00382+K00382+K00161+K01647+K00026+…
Metabolism	Global and overview maps	Metabolic pathways	952	4196	2.09458e-05	0.000171493	ko01100	Unigene0000048;Unigene0000204;Unigene0000207;Unigene0000256;Unigene0000300;Unigene0000302;Unigene0000372;Unigene0000999;Unigene0001030;Unigene0001056;Unigene0001090;Unigene0001320;Unigene0001386;Unigene0001524;Unigene0001607;Unigene0001849;Unigene0001945;Unigene0001953;Unigene0002265;Unigene0002496;Unigene0002757;Unigene0002890;Unigene0002908;Unigene0002939;Unigene0003307;Unigene0003334;Unigene00…	K17761+K12447+K00616+K05894+K01610+K01520+K00912+K01915+K00161+K00616+K01859+K00963+K01681+K02258+K01188+K00895+K00278+K09840+K00134+K00134+K01464+K11816+K02155+K00616+K01638+K00121+K00876+K00033+K00235+K00430+K03782+K00234+K00128+K03006+K13065+K00235+K00549+K01681+K02132+K03006+K15919+K01602+K01681+K00940+K10532+K00234+K01637+K18592+K02267+K01803+K01114+K21374+K02721+K01184+K00002+K01610+K00083+…
Cellular Processes	Transport and catabolism	Peroxisome	73	236	0.000112747	0.000868817	ko04146	Unigene0004731;Unigene0005763;Unigene0006341;Unigene0007107;Unigene0007141;Unigene0007684;Unigene0008151;Unigene0011183;Unigene0012943;Unigene0013544;Unigene0013757;Unigene0015145;Unigene0015733;Unigene0019161;Unigene0021717;Unigene0022694;Unigene0022695;Unigene0023298;Unigene0024003;Unigene0024038;Unigene0024252;Unigene0024778;Unigene0025343;Unigene0027117;Unigene0027461;Unigene0028305;Unigene00…	K13356+K03781+K03781+K07513+K07513+K01897+K04565+K03781+K03781+K07513+K00031+K13237+K03781+K07513+K03781+K01897+K01897+K03781+K01897+K07513+K04564+K11517+K07513+K00031+K11147+K00031+K04565+K04564+K03781+K04565+K07513+K04565+K03781+K03781+K07513+K03781+K04565+K04565+K01640+K03781+K03781+K03781+K04565+K04565+K04565+K04565+K11147+K01897+K01897+K03781+K03781+K03781+K03781+K01897+K11517+K04565+K04564+…
Metabolism	Energy metabolism	Photosynthesis	46	135	0.000184513	0.00134285	ko00195	Unigene0006553;Unigene0008069;Unigene0008215;Unigene0009271;Unigene0012023;Unigene0014083;Unigene0014212;Unigene0014935;Unigene0015223;Unigene0016572;Unigene0016863;Unigene0021613;Unigene0028252;Unigene0030129;Unigene0030451;Unigene0031308;Unigene0035381;Unigene0037461;Unigene0039203;Unigene0039204;Unigene0039205;Unigene0042014;Unigene0042264;Unigene0042742;Unigene0043140;Unigene0043985;Unigene00…	K02721+K02690+K02716+K02695+K02721+K02110+K02689+K02698+K02641+K02701+K02638+K02115+K08905+K08905+K02636+K02693+K02721+K02113+K02639+K02639+K02639+K02693+K02723+K08901+K02111+K02701+K02701+K02115+K02115+K03542+K08903+K08903+K02695+K02704+K03541+K02636+K02110+K02699+K02108+K02638+K02698+K02639+K08902+K02716+K02109+K02694
Metabolism	Amino acid metabolism	Histidine metabolism	26	64	0.00021117	0.00145596	ko00340	Unigene0004189;Unigene0011184;Unigene0012012;Unigene0012056;Unigene0012401;Unigene0016754;Unigene0025720;Unigene0026958;Unigene0026959;Unigene0031517;Unigene0047798;Unigene0048943;Unigene0051436;Unigene0051437;Unigene0051438;Unigene0051440;Unigene0051441;Unigene0051442;Unigene0060996;Unigene0060997;Unigene0075443;Unigene0075444;Unigene0081273;Unigene0086094;Unigene0087326;Unigene0094150	K00128+K00128+K00128+K01590+K00128+K00128+K00128+K00128+K00128+K00128+K00128+K01590+K00128+K00128+K00128+K00128+K00128+K00128+K00128+K00128+K00128+K00128+K00128+K00128+K00128+K00128
Metabolism	Metabolism of other amino acids	beta-Alanine metabolism	40	118	0.00053093	0.00347759	ko00410	Unigene0002757;Unigene0004189;Unigene0010129;Unigene0011184;Unigene0011758;Unigene0012012;Unigene0012401;Unigene0014236;Unigene0016754;Unigene0022212;Unigene0022499;Unigene0025720;Unigene0026958;Unigene0026959;Unigene0027014;Unigene0028257;Unigene0031517;Unigene0046862;Unigene0047798;Unigene0048962;Unigene0051436;Unigene0051437;Unigene0051438;Unigene0051440;Unigene0051441;Unigene0051442;Unigene00…	K01464+K00128+K01464+K00128+K00276+K00128+K00128+K00140+K00128+K00249+K00249+K00128+K00128+K00128+K00249+K05605+K00128+K17839+K00128+K13366+K00128+K00128+K00128+K00128+K00128+K00128+K01580+K01580+K00128+K00128+K00276+K12259+K01464+K01464+K00128+K00128+K00128+K00128+K00128+K00128
Metabolism	Lipid metabolism	Arachidonic acid metabolism	18	41	0.000650202	0.00405602	ko00590	Unigene0004662;Unigene0005748;Unigene0017416;Unigene0026224;Unigene0032896;Unigene0032897;Unigene0042289;Unigene0043384;Unigene0046517;Unigene0049415;Unigene0052498;Unigene0059035;Unigene0060840;Unigene0066455;Unigene0070409;Unigene0083928;Unigene0086415;Unigene0089413	K00432+K18592+K07425+K07425+K15730+K15730+K01047+K07425+K00432+K00432+K01832+K05309+K07425+K18592+K18592+K00432+K15730+K00432
Metabolism	Amino acid metabolism	Alanine, aspartate and glutamate metabolism	40	125	0.0018643	0.011101	ko00250	Unigene0000048;Unigene0000999;Unigene0001945;Unigene0007671;Unigene0011673;Unigene0018655;Unigene0023009;Unigene0023792;Unigene0024630;Unigene0024631;Unigene0026938;Unigene0029337;Unigene0029338;Unigene0030751;Unigene0031852;Unigene0033537;Unigene0034748;Unigene0038430;Unigene0042171;Unigene0047703;Unigene0047705;Unigene0049616;Unigene0049709;Unigene0053976;Unigene0054258;Unigene0054260;Unigene00…	K17761+K01915+K00278+K01915+K00264+K00820+K01915+K17761+K01915+K01915+K00264+K01915+K01915+K17761+K01915+K17761+K00261+K17761+K17761+K17761+K17761+K14272+K00827+K01915+K01580+K01580+K01953+K01756+K00278+K00264+K01915+K00262+K00764+K17761+K17761+K01939+K14454+K01915+K01915+K00811
Metabolism	Carbohydrate metabolism	Pentose and glucuronate interconversions	46	149	0.00203078	0.0115666	ko00040	Unigene0000204;Unigene0001320;Unigene0003652;Unigene0006585;Unigene0006601;Unigene0006975;Unigene0008897;Unigene0013189;Unigene0013442;Unigene0016557;Unigene0018298;Unigene0019750;Unigene0024111;Unigene0026157;Unigene0027006;Unigene0029535;Unigene0031777;Unigene0033680;Unigene0033681;Unigene0033713;Unigene0035716;Unigene0037597;Unigene0043616;Unigene0047777;Unigene0048428;Unigene0048429;Unigene00…	K12447+K00963+K01728+K01184+K00002+K00002+K12447+K01051+K00963+K00002+K01213+K00002+K12447+K12447+K00002+K01051+K01728+K01051+K01051+K00011+K00963+K00012+K01051+K01728+K00002+K00002+K01728+K01051+K01805+K01728+K01728+K12447+K01728+K01783+K01051+K12447+K00002+K01728+K01728+K01728+K01728+K01728+K00002+K01728+K01728+K01051
Metabolism	Amino acid metabolism	Phenylalanine metabolism	31	93	0.00287913	0.0157153	ko00360	Unigene0003889;Unigene0010160;Unigene0011547;Unigene0011758;Unigene0012961;Unigene0015973;Unigene0016124;Unigene0016509;Unigene0016564;Unigene0020823;Unigene0020824;Unigene0024099;Unigene0026893;Unigene0026894;Unigene0028392;Unigene0029603;Unigene0034928;Unigene0034929;Unigene0034930;Unigene0043091;Unigene0043092;Unigene0061187;Unigene0061188;Unigene0061189;Unigene0061190;Unigene0061191;Unigene00…	K03782+K03782+K03782+K00276+K03782+K01904+K00815+K03782+K03782+K01593+K22328+K03782+K03782+K03782+K00815+K01593+K03782+K03782+K03782+K03782+K03782+K03782+K03782+K03782+K03782+K03782+K00276+K01593+K00457+K14454+K00811
Metabolism	Global and overview maps	Biosynthesis of amino acids	137	538	0.00335781	0.0175949	ko01230	Unigene0000207;Unigene0000999;Unigene0001056;Unigene0001386;Unigene0002265;Unigene0002496;Unigene0002939;Unigene0004545;Unigene0004587;Unigene0004907;Unigene0005862;Unigene0007157;Unigene0007671;Unigene0008424;Unigene0008680;Unigene0009034;Unigene0010592;Unigene0010952;Unigene0011320;Unigene0011673;Unigene0011784;Unigene0012353;Unigene0012441;Unigene0012849;Unigene0013368;Unigene0013757;Unigene00…	K00616+K01915+K00616+K01681+K00134+K00134+K00616+K00549+K01681+K01681+K01803+K01681+K01915+K00134+K00134+K00134+K00640+K00549+K00134+K00264+K01647+K01739+K00789+K00616+K01647+K00031+K00549+K01623+K00873+K00134+K00826+K01647+K00815+K00134+K00058+K01689+K00789+K00058+K01681+K01681+K01681+K00053+K01681+K00948+K01624+K01915+K01652+K01681+K01915+K01915+K01689+K00616+K00616+K00264+K00031+K00789+K00789+…
Metabolism	Carbohydrate metabolism	Ascorbate and aldarate metabolism	40	132	0.0054773	0.0275972	ko00053	Unigene0000204;Unigene0004189;Unigene0008897;Unigene0011184;Unigene0012012;Unigene0012401;Unigene0016754;Unigene0024111;Unigene0025720;Unigene0026157;Unigene0026718;Unigene0026958;Unigene0026959;Unigene0031517;Unigene0037597;Unigene0038065;Unigene0042668;Unigene0044677;Unigene0044703;Unigene0045134;Unigene0047798;Unigene0051436;Unigene0051437;Unigene0051438;Unigene0051440;Unigene0051441;Unigene00…	K12447+K00128+K12447+K00128+K00128+K00128+K00128+K12447+K00128+K12447+K10047+K00128+K00128+K00128+K00012+K00469+K19642+K14190+K21888+K08232+K00128+K00128+K00128+K00128+K00128+K00128+K00128+K10047+K12447+K00434+K00128+K00128+K12447+K00128+K00128+K00469+K00128+K00128+K00128+K00128
Metabolism	Energy metabolism	Photosynthesis - antenna proteins	13	31	0.00580063	0.0281438	ko00196	Unigene0013538;Unigene0014554;Unigene0020994;Unigene0021863;Unigene0039353;Unigene0040436;Unigene0042382;Unigene0047409;Unigene0048744;Unigene0052980;Unigene0052981;Unigene0092973;Unigene0093335	K08912+K08909+K08914+K08913+K08912+K08914+K08913+K08908+K08916+K08917+K08917+K08913+K08913
Metabolism	Biosynthesis of other secondary metabolites	Flavonoid biosynthesis	17	45	0.00617005	0.028867	ko00941	Unigene0001090;Unigene0004415;Unigene0013930;Unigene0020729;Unigene0034294;Unigene0037144;Unigene0037718;Unigene0038762;Unigene0038999;Unigene0041141;Unigene0042859;Unigene0042860;Unigene0042911;Unigene0044676;Unigene0044767;Unigene0091899;Unigene0091900	K01859+K13065+K13081+K08695+K01859+K00660+K13065+K00475+K01859+K13082+K05280+K05280+K13065+K05277+K00660+K05278+K05278
Metabolism	Amino acid metabolism	Lysine degradation	39	130	0.00725297	0.0327634	ko00310	Unigene0004189;Unigene0011184;Unigene0012012;Unigene0012401;Unigene0016754;Unigene0021763;Unigene0024040;Unigene0025720;Unigene0026138;Unigene0026920;Unigene0026921;Unigene0026958;Unigene0026959;Unigene0031517;Unigene0047798;Unigene0051436;Unigene0051437;Unigene0051438;Unigene0051440;Unigene0051441;Unigene0051442;Unigene0056840;Unigene0060996;Unigene0060997;Unigene0065882;Unigene0066062;Unigene00…	K00128+K00128+K00128+K00128+K00128+K00164+K00626+K00128+K00626+K00252+K00252+K00128+K00128+K00128+K00128+K00128+K00128+K00128+K00128+K00128+K00128+K11423+K00128+K00128+K00658+K00626+K11433+K14157+K11430+K00128+K00128+K00252+K00128+K00128+K00252+K00128+K00626+K00164+K00128
Metabolism	Energy metabolism	Nitrogen metabolism	29	91	0.00784794	0.0342693	ko00910	Unigene0000999;Unigene0007148;Unigene0007671;Unigene0011673;Unigene0014962;Unigene0017090;Unigene0017510;Unigene0023009;Unigene0024630;Unigene0024631;Unigene0026139;Unigene0026938;Unigene0029337;Unigene0029338;Unigene0031852;Unigene0034748;Unigene0035082;Unigene0040755;Unigene0042936;Unigene0045580;Unigene0052295;Unigene0053976;Unigene0058534;Unigene0077014;Unigene0077681;Unigene0080480;Unigene00…	K01915+K01455+K01915+K00264+K01674+K10534+K01674+K01915+K01915+K01915+K10534+K00264+K01915+K01915+K01915+K00261+K01674+K00284+K01674+K01673+K01673+K01915+K01455+K00264+K01915+K02575+K00262+K01915+K01915
Metabolism	Metabolism of other amino acids	Glutathione metabolism	55	197	0.00867637	0.0366646	ko00480	Unigene0003474;Unigene0004662;Unigene0005345;Unigene0005748;Unigene0008985;Unigene0013757;Unigene0013803;Unigene0014555;Unigene0016218;Unigene0016541;Unigene0021798;Unigene0024624;Unigene0024626;Unigene0025277;Unigene0025650;Unigene0026058;Unigene0027117;Unigene0028125;Unigene0028305;Unigene0028528;Unigene0029346;Unigene0033645;Unigene0035889;Unigene0035935;Unigene0037844;Unigene0037845;Unigene00…	K00033+K00432+K00799+K18592+K00799+K00031+K01255+K00799+K00799+K00033+K00799+K11140+K11140+K00799+K00799+K00033+K00031+K00799+K00031+K00799+K00799+K21456+K00799+K00799+K00033+K00033+K00033+K00799+K00799+K00799+K00799+K21888+K00432+K00432+K00033+K00799+K00799+K00799+K00799+K00434+K11204+K18592+K18592+K01256+K00799+K00799+K00031+K00799+K00036+K00432+K00031+K00036+K01581+K00432+K10807
Metabolism	Lipid metabolism	Fatty acid biosynthesis	32	105	0.0110709	0.0453217	ko00061	Unigene0001651;Unigene0006897;Unigene0007684;Unigene0008421;Unigene0011915;Unigene0019629;Unigene0020129;Unigene0022694;Unigene0022695;Unigene0023067;Unigene0024003;Unigene0025683;Unigene0027805;Unigene0028367;Unigene0034957;Unigene0034958;Unigene0036203;Unigene0042737;Unigene0044710;Unigene0054337;Unigene0054663;Unigene0057533;Unigene0064863;Unigene0065547;Unigene0065548;Unigene0069072;Unigene00…	K03921+K00059+K01897+K00059+K09458+K00059+K09458+K01897+K01897+K00059+K01897+K11262+K00059+K11262+K00059+K00059+K00059+K00059+K02160+K00648+K01897+K01897+K01897+K10781+K10781+K09458+K01961+K01897+K00059+K00059+K11262+K00665
Metabolism	Amino acid metabolism	Arginine and proline metabolism	40	138	0.0121883	0.048384	ko00330	Unigene0004189;Unigene0011184;Unigene0012012;Unigene0012401;Unigene0016754;Unigene0025720;Unigene0026958;Unigene0026959;Unigene0031517;Unigene0033999;Unigene0044652;Unigene0044653;Unigene0046862;Unigene0047798;Unigene0048962;Unigene0050985;Unigene0051436;Unigene0051437;Unigene0051438;Unigene0051440;Unigene0051441;Unigene0051442;Unigene0055228;Unigene0059280;Unigene0060996;Unigene0060997;Unigene00…	K00128+K00128+K00128+K00128+K00128+K00128+K00128+K00128+K00128+K12657+K00472+K00472+K17839+K00128+K13366+K01611+K00128+K00128+K00128+K00128+K00128+K00128+K00819+K01611+K00128+K00128+K00318+K12259+K13427+K00128+K00128+K00318+K01611+K00128+K00128+K00128+K01581+K14454+K00811+K00128
Metabolism	Metabolism of terpenoids and polyketides	Sesquiterpenoid and triterpenoid biosynthesis	11	27	0.0138811	0.0534413	ko00909	Unigene0016370;Unigene0029614;Unigene0041812;Unigene0048621;Unigene0048622;Unigene0064352;Unigene0064354;Unigene0065756;Unigene0065844;Unigene0067779;Unigene0068083	K00511+K00801+K14173+K00801+K00801+K00801+K00801+K15803+K15803+K00511+K15813
Metabolism	Carbohydrate metabolism	Butanoate metabolism	19	56	0.0142782	0.0534413	ko00650	Unigene0000048;Unigene0023214;Unigene0023792;Unigene0024040;Unigene0026138;Unigene0030751;Unigene0033537;Unigene0038430;Unigene0041303;Unigene0042171;Unigene0047703;Unigene0047705;Unigene0054258;Unigene0054260;Unigene0066062;Unigene0072804;Unigene0085003;Unigene0087799;Unigene0089354	K17761+K01652+K17761+K00626+K00626+K17761+K17761+K17761+K01640+K17761+K17761+K17761+K01580+K01580+K00626+K01641+K17761+K00626+K17761
Metabolism	Biosynthesis of other secondary metabolites	Phenylpropanoid biosynthesis	66	252	0.0192202	0.0699403	ko00940	Unigene0001607;Unigene0003738;Unigene0004415;Unigene0006813;Unigene0007085;Unigene0007380;Unigene0010260;Unigene0010293;Unigene0013218;Unigene0013561;Unigene0013567;Unigene0014337;Unigene0015973;Unigene0016547;Unigene0021247;Unigene0021432;Unigene0021433;Unigene0021477;Unigene0023783;Unigene0025416;Unigene0026685;Unigene0026686;Unigene0027977;Unigene0029187;Unigene0029358;Unigene0031466;Unigene00…	K01188+K00430+K13065+K00083+K00083+K00083+K00083+K00430+K00083+K11188+K00083+K00083+K01904+K00083+K00430+K09753+K09753+K00083+K00083+K00083+K05350+K05350+K00430+K00083+K00083+K12356+K01188+K00430+K00430+K13065+K11188+K11188+K00430+K13066+K13065+K00430+K00430+K00430+K00430+K00430+K00083+K00430+K09753+K12356+K00430+K00083+K01188+K00083+K05350+K05349+K00430+K22395+K00083+K00083+K00083+K00083+K00083+…
Metabolism	Metabolism of cofactors and vitamins	Biotin metabolism	14	39	0.0200194	0.0708796	ko00780	Unigene0006897;Unigene0008421;Unigene0011915;Unigene0019629;Unigene0020129;Unigene0023067;Unigene0027805;Unigene0034957;Unigene0034958;Unigene0036203;Unigene0042737;Unigene0069072;Unigene0080085;Unigene0087896	K00059+K00059+K09458+K00059+K09458+K00059+K00059+K00059+K00059+K00059+K00059+K09458+K00059+K00059
Metabolism	Lipid metabolism	Glycerolipid metabolism	47	174	0.0258415	0.0890853	ko00561	Unigene0004189;Unigene0006601;Unigene0006975;Unigene0011184;Unigene0011467;Unigene0012012;Unigene0012401;Unigene0016557;Unigene0016754;Unigene0019750;Unigene0025720;Unigene0026958;Unigene0026959;Unigene0027006;Unigene0028912;Unigene0031517;Unigene0031913;Unigene0033713;Unigene0042812;Unigene0047798;Unigene0048428;Unigene0048429;Unigene0050413;Unigene0051436;Unigene0051437;Unigene0051438;Unigene00…	K00128+K00002+K00002+K00128+K00901+K00128+K00128+K00002+K00128+K00002+K00128+K00128+K00128+K00002+K14452+K00128+K01054+K00011+K13508+K00128+K00002+K00002+K01054+K00128+K00128+K00128+K00128+K00128+K00128+K13509+K00655+K01054+K00128+K00128+K13508+K13508+K07407+K00002+K07407+K00128+K00128+K00002+K00128+K00128+K00128+K00864+K00128
Metabolism	Carbohydrate metabolism	Propanoate metabolism	27	96	0.0494426	0.166077	ko00640	Unigene0011285;Unigene0011366;Unigene0014236;Unigene0019237;Unigene0022212;Unigene0022499;Unigene0024040;Unigene0024658;Unigene0024659;Unigene0025683;Unigene0026138;Unigene0026423;Unigene0026424;Unigene0027014;Unigene0028257;Unigene0028367;Unigene0039194;Unigene0044710;Unigene0050945;Unigene0066057;Unigene0066059;Unigene0066062;Unigene0072244;Unigene0087799;Unigene0089718;Unigene0091858;Unigene00…	K01895+K01895+K00140+K01895+K00249+K00249+K00626+K01895+K01895+K11262+K00626+K01895+K01895+K00249+K05605+K11262+K01895+K02160+K00016+K00382+K00382+K00626+K01961+K00626+K11262+K01895+K01900
Metabolism	Carbohydrate metabolism	Fructose and mannose metabolism	36	135	0.0549632	0.180005	ko00051	Unigene0001849;Unigene0005862;Unigene0014092;Unigene0014434;Unigene0017228;Unigene0017229;Unigene0017735;Unigene0022910;Unigene0028761;Unigene0031339;Unigene0033713;Unigene0035914;Unigene0038023;Unigene0041360;Unigene0041361;Unigene0041362;Unigene0041363;Unigene0041364;Unigene0041687;Unigene0042572;Unigene0043280;Unigene0048476;Unigene0051129;Unigene0053162;Unigene0053165;Unigene0054417;Unigene00…	K00895+K01803+K01623+K19355+K00844+K00844+K21071+K01624+K01624+K19355+K00011+K00895+K03841+K01624+K01624+K01624+K01624+K01624+K19355+K01623+K19355+K01711+K01805+K01623+K01623+K19355+K00844+K01803+K00895+K01623+K03841+K01623+K01624+K03841+K01103+K01624
Metabolism	Biosynthesis of other secondary metabolites	Flavone and flavonol biosynthesis	3	5	0.0630778	0.19885	ko00944	Unigene0038113;Unigene0042859;Unigene0042860	K22794+K05280+K05280
Metabolism	Global and overview maps	2-Oxocarboxylic acid metabolism	34	128	0.0637534	0.19885	ko01210	Unigene0001386;Unigene0004587;Unigene0004907;Unigene0007157;Unigene0011784;Unigene0013368;Unigene0013757;Unigene0015588;Unigene0016026;Unigene0020100;Unigene0020101;Unigene0020687;Unigene0022364;Unigene0022393;Unigene0023214;Unigene0023478;Unigene0027117;Unigene0028305;Unigene0032188;Unigene0034710;Unigene0039637;Unigene0039851;Unigene0042717;Unigene0049616;Unigene0061555;Unigene0062716;Unigene00…	K01681+K01681+K01681+K01681+K01647+K01647+K00031+K00826+K01647+K01681+K01681+K01681+K00053+K01681+K01652+K01681+K00031+K00031+K00826+K01681+K01681+K01647+K01681+K14272+K00030+K00053+K01647+K14682+K00031+K00031+K14454+K00811+K01681+K01681
Metabolism	Lipid metabolism	Cutin, suberine and wax biosynthesis	14	45	0.0653081	0.198962	ko00073	Unigene0004731;Unigene0011007;Unigene0011354;Unigene0013629;Unigene0033667;Unigene0047850;Unigene0049928;Unigene0058481;Unigene0061591;Unigene0082372;Unigene0083171;Unigene0085875;Unigene0086675;Unigene0088122	K13356+K15403+K15398+K15404+K20769+K15403+K15404+K15398+K15404+K15400+K15400+K13356+K15403+K17991
Metabolism	Metabolism of other amino acids	Selenocompound metabolism	17	60	0.0977461	0.291017	ko00450	Unigene0004545;Unigene0010952;Unigene0012353;Unigene0013796;Unigene0021243;Unigene0028707;Unigene0032715;Unigene0039430;Unigene0056033;Unigene0056034;Unigene0056036;Unigene0060539;Unigene0072608;Unigene0072609;Unigene0073971;Unigene0076172;Unigene0076176	K00549+K00549+K01739+K00549+K22182+K13811+K00549+K13811+K00549+K00549+K00549+K13811+K00549+K00549+K00384+K08247+K08247
Metabolism	Lipid metabolism	Fatty acid elongation	20	73	0.102583	0.298631	ko00062	Unigene0006836;Unigene0011811;Unigene0020118;Unigene0028704;Unigene0029786;Unigene0031678;Unigene0033077;Unigene0038730;Unigene0039556;Unigene0041379;Unigene0045945;Unigene0049509;Unigene0056588;Unigene0073564;Unigene0081940;Unigene0083086;Unigene0083118;Unigene0084197;Unigene0084897;Unigene0084953	K10258+K15397+K15397+K15397+K10249+K10258+K15397+K15397+K15397+K15397+K10703+K15397+K15397+K01076+K15397+K10251+K10258+K01074+K10249+K10244
Metabolism	Biosynthesis of other secondary metabolites	Tropane, piperidine and pyridine alkaloid biosynthesis	10	32	0.10655	0.303436	ko00960	Unigene0011758;Unigene0016124;Unigene0025535;Unigene0028392;Unigene0037777;Unigene0043188;Unigene0061735;Unigene0087596;Unigene0091150;Unigene0092191	K00276+K00815+K08081+K00815+K08081+K08081+K00276+K08081+K14454+K00811
Metabolism	Biosynthesis of other secondary metabolites	Isoquinoline alkaloid biosynthesis	11	37	0.124612	0.347322	ko00950	Unigene0011758;Unigene0016124;Unigene0020823;Unigene0026919;Unigene0028392;Unigene0029603;Unigene0036887;Unigene0061735;Unigene0077903;Unigene0091150;Unigene0092191	K00276+K00815+K01593+K00422+K00815+K01593+K00422+K00276+K01593+K14454+K00811
Metabolism	Amino acid metabolism	Tyrosine metabolism	22	85	0.145164	0.396177	ko00350	Unigene0003334;Unigene0011692;Unigene0011758;Unigene0016124;Unigene0019275;Unigene0020713;Unigene0020823;Unigene0020938;Unigene0025706;Unigene0026919;Unigene0027433;Unigene0027434;Unigene0028392;Unigene0029603;Unigene0036887;Unigene0043379;Unigene0061735;Unigene0077903;Unigene0084945;Unigene0088255;Unigene0091150;Unigene0092191	K00121+K00121+K00276+K00815+K00121+K00121+K01593+K01555+K13953+K00422+K00121+K00121+K00815+K01593+K00422+K00121+K00276+K01593+K00457+K00121+K14454+K00811
Metabolism	Amino acid metabolism	Arginine biosynthesis	19	73	0.160381	0.428774	ko00220	Unigene0000999;Unigene0007671;Unigene0023009;Unigene0024630;Unigene0024631;Unigene0029337;Unigene0029338;Unigene0031852;Unigene0034748;Unigene0049616;Unigene0053976;Unigene0070727;Unigene0074706;Unigene0077681;Unigene0080487;Unigene0091150;Unigene0091802;Unigene0092113;Unigene0092191	K01915+K01915+K01915+K01915+K01915+K01915+K01915+K01915+K00261+K14272+K01915+K13427+K14682+K01915+K00262+K14454+K01915+K01915+K00811
Metabolism	Biosynthesis of other secondary metabolites	Indole alkaloid biosynthesis	5	15	0.181558	0.468383	ko00901	Unigene0002737;Unigene0020823;Unigene0029603;Unigene0051088;Unigene0077903	K21026+K01593+K01593+K21026+K01593
Metabolism	Metabolism of other amino acids	Taurine and hypotaurine metabolism	6	19	0.182347	0.468383	ko00430	Unigene0005748;Unigene0046052;Unigene0054258;Unigene0054260;Unigene0066455;Unigene0070409	K18592+K10712+K01580+K01580+K18592+K18592
Metabolism	Metabolism of terpenoids and polyketides	Zeatin biosynthesis	11	40	0.188194	0.470898	ko00908	Unigene0008842;Unigene0011036;Unigene0023299;Unigene0028303;Unigene0031704;Unigene0036518;Unigene0040754;Unigene0043578;Unigene0051111;Unigene0063295;Unigene0070602	K00279+K10760+K00279+K13495+K13495+K00279+K00279+K00279+K13495+K13495+K00279
Metabolism	Metabolism of terpenoids and polyketides	Carotenoid biosynthesis	14	53	0.190516	0.470898	ko00906	Unigene0001953;Unigene0004027;Unigene0014965;Unigene0040847;Unigene0047529;Unigene0047530;Unigene0048646;Unigene0048647;Unigene0057531;Unigene0066720;Unigene0066724;Unigene0070373;Unigene0072964;Unigene0072965	K09840+K09843+K15747+K14595+K09840+K09840+K15746+K15746+K09840+K09843+K09843+K09838+K09842+K09842
Metabolism	Metabolism of terpenoids and polyketides	Diterpenoid biosynthesis	9	33	0.22837	0.554008	ko00904	Unigene0020461;Unigene0035999;Unigene0036549;Unigene0039689;Unigene0042563;Unigene0043262;Unigene0043862;Unigene0049275;Unigene0081434	K04124+K04125+K04124+K04122+K04125+K04125+K17961+K04120+K04120
Metabolism	Biosynthesis of other secondary metabolites	Caffeine metabolism	2	5	0.276291	0.653502	ko00232	Unigene0050419;Unigene0090413	K07409+K00365
Metabolism	Biosynthesis of other secondary metabolites	Betalain biosynthesis	3	9	0.27936	0.653502	ko00965	Unigene0020823;Unigene0029603;Unigene0077903	K01593+K01593+K01593
Cellular Processes	Transport and catabolism	Endocytosis	88	402	0.285862	0.656981	ko04144	Unigene0000531;Unigene0004140;Unigene0004175;Unigene0006487;Unigene0006580;Unigene0008570;Unigene0008571;Unigene0008572;Unigene0008573;Unigene0008574;Unigene0008575;Unigene0008576;Unigene0008577;Unigene0008578;Unigene0008580;Unigene0008581;Unigene0008582;Unigene0008583;Unigene0008585;Unigene0008586;Unigene0008587;Unigene0009532;Unigene0010064;Unigene0010091;Unigene0011131;Unigene0012086;Unigene00…	K03283+K07904+K03283+K03283+K12183+K03283+K03283+K03283+K03283+K03283+K03283+K03283+K03283+K03283+K03283+K03283+K03283+K03283+K03283+K03283+K03283+K07937+K03283+K07937+K03283+K03283+K03283+K03283+K03283+K03283+K03283+K03283+K03283+K03283+K07937+K12493+K03283+K03283+K07937+K07937+K07937+K07904+K01115+K03283+K07937+K01115+K03283+K03283+K03283+K03283+K03283+K12199+K05758+K03283+K03283+K03283+K03283+…
Metabolism	Lipid metabolism	Synthesis and degradation of ketone bodies	6	22	0.294299	0.664709	ko00072	Unigene0024040;Unigene0026138;Unigene0041303;Unigene0066062;Unigene0072804;Unigene0087799	K00626+K00626+K01640+K00626+K01641+K00626
Metabolism	Glycan biosynthesis and metabolism	Glycosphingolipid biosynthesis - globo and isoglobo series	6	23	0.33439	0.74246	ko00603	Unigene0010672;Unigene0042202;Unigene0053095;Unigene0065535;Unigene0065997;Unigene0071526	K12373+K01988+K12373+K07407+K12373+K07407
Organismal Systems	Environmental adaptation	Plant-pathogen interaction	131	616	0.367416	0.802192	ko04626	Unigene0000355;Unigene0002573;Unigene0004021;Unigene0004663;Unigene0004962;Unigene0005758;Unigene0005887;Unigene0007499;Unigene0007500;Unigene0007571;Unigene0007733;Unigene0007940;Unigene0008089;Unigene0008296;Unigene0009111;Unigene0009129;Unigene0009130;Unigene0009829;Unigene0010111;Unigene0010112;Unigene0010113;Unigene0010334;Unigene0010822;Unigene0010900;Unigene0011811;Unigene0013440;Unigene00…	K09422+K09422+K13414+K09422+K13420+K13412+K09422+K13459+K13459+K13449+K04079+K13459+K04079+K09422+K13449+K04079+K04079+K13449+K13459+K13459+K13459+K13448+K05391+K13425+K15397+K02183+K05391+K09422+K04079+K09422+K14512+K15397+K09487+K09422+K01373+K02183+K02183+K02183+K05391+K02183+K15397+K04079+K13412+K13448+K09422+K13448+K13448+K09422+K09422+K09422+K15397+K09422+K13412+K09422+K04079+K18835+K09422+…
Metabolism	Amino acid metabolism	Cysteine and methionine metabolism	45	207	0.376409	0.808354	ko00270	Unigene0004545;Unigene0010592;Unigene0010952;Unigene0012353;Unigene0012441;Unigene0013796;Unigene0015588;Unigene0016124;Unigene0019086;Unigene0027250;Unigene0027251;Unigene0027938;Unigene0028392;Unigene0032188;Unigene0032509;Unigene0032715;Unigene0033645;Unigene0034859;Unigene0035446;Unigene0036438;Unigene0041052;Unigene0049709;Unigene0050945;Unigene0050985;Unigene0052240;Unigene0056033;Unigene00…	K00549+K00640+K00549+K01739+K00789+K00549+K00826+K00815+K00789+K00789+K00789+K00789+K00815+K00826+K00026+K00549+K21456+K00789+K00026+K00789+K00558+K00827+K00016+K01611+K05933+K00549+K00549+K00549+K01611+K01762+K08967+K05933+K00789+K11204+K01251+K00549+K00549+K17398+K00026+K01611+K00026+K00026+K00789+K14454+K00811
Metabolism	Metabolism of terpenoids and polyketides	Monoterpenoid biosynthesis	3	11	0.404552	0.854778	ko00902	Unigene0038120;Unigene0057550;Unigene0066158	K07385+K15095+K15095
Metabolism	Biosynthesis of other secondary metabolites	Isoflavonoid biosynthesis	2	7	0.441424	0.917882	ko00943	Unigene0049007;Unigene0051991	K13260+K13260
Environmental Information Processing	Signal transduction	MAPK signaling pathway - plant	67	318	0.450258	0.921623	ko04016	Unigene0000587;Unigene0002307;Unigene0004021;Unigene0004936;Unigene0004962;Unigene0005133;Unigene0005763;Unigene0006341;Unigene0007571;Unigene0009111;Unigene0009829;Unigene0010398;Unigene0010900;Unigene0011183;Unigene0012943;Unigene0013440;Unigene0015733;Unigene0017379;Unigene0021717;Unigene0023298;Unigene0023992;Unigene0024121;Unigene0024272;Unigene0026954;Unigene0027437;Unigene0027438;Unigene00…	K14497+K20725+K13414+K20716+K13420+K00940+K03781+K03781+K13449+K13449+K13449+K20718+K13425+K03781+K03781+K02183+K03781+K14512+K03781+K03781+K02183+K02183+K02183+K02183+K00940+K00940+K20547+K14497+K03781+K03781+K03781+K03781+K20716+K00940+K13447+K20716+K02183+K03781+K03781+K03781+K13449+K14497+K13414+K14515+K20535+K14496+K14496+K17686+K20547+K14497+K03781+K03781+K03781+K03781+K13424+K13424+K13414+…
Metabolism	Glycan biosynthesis and metabolism	Mannose type O-glycan biosyntheis	1	3	0.50062	1	ko00515	Unigene0007435	K18207
Metabolism	Lipid metabolism	alpha-Linolenic acid metabolism	17	81	0.515173	1	ko00592	Unigene0000256;Unigene0007107;Unigene0007141;Unigene0013544;Unigene0016591;Unigene0019161;Unigene0021015;Unigene0021016;Unigene0024038;Unigene0025343;Unigene0034080;Unigene0035219;Unigene0042289;Unigene0080247;Unigene0081680;Unigene0082463;Unigene0087430	K05894+K07513+K07513+K07513+K05894+K07513+K10527+K10527+K07513+K07513+K07513+K07513+K01047+K07513+K07513+K05894+K07513
Organismal Systems	Environmental adaptation	Circadian rhythm - plant	17	81	0.515173	1	ko04712	Unigene0002300;Unigene0010840;Unigene0011534;Unigene0030305;Unigene0030306;Unigene0030601;Unigene0037144;Unigene0044767;Unigene0044825;Unigene0055900;Unigene0063102;Unigene0063104;Unigene0064468;Unigene0064469;Unigene0064471;Unigene0077688;Unigene0087697	K10143+K16221+K12125+K16223+K16223+K12126+K00660+K00660+K10143+K12129+K12115+K12115+K12133+K12133+K12133+K10143+K12116
Metabolism	Metabolism of other amino acids	Phosphonate and phosphinate metabolism	3	14	0.576543	1	ko00440	Unigene0011545;Unigene0039916;Unigene0039917	K00968+K00968+K00968
Metabolism	Lipid metabolism	Steroid biosynthesis	10	50	0.601959	1	ko00100	Unigene0010567;Unigene0016370;Unigene0028913;Unigene0029614;Unigene0048211;Unigene0048621;Unigene0048622;Unigene0064352;Unigene0064354;Unigene0067779	K01052+K00511+K01052+K00801+K14423+K00801+K00801+K00801+K00801+K00511
Metabolism	Glycan biosynthesis and metabolism	Glycosphingolipid biosynthesis - lacto and neolacto series	1	4	0.603824	1	ko00601	Unigene0042202	K01988
Metabolism	Biosynthesis of other secondary metabolites	Monobactam biosynthesis	3	15	0.626504	1	ko00261	Unigene0028707;Unigene0039430;Unigene0060539	K13811+K13811+K13811
Metabolism	Glycan biosynthesis and metabolism	Glycosphingolipid biosynthesis - ganglio series	3	16	0.67224	1	ko00604	Unigene0010672;Unigene0053095;Unigene0065997	K12373+K12373+K12373
Metabolism	Energy metabolism	Sulfur metabolism	10	53	0.679732	1	ko00920	Unigene0006175;Unigene0010592;Unigene0012353;Unigene0028707;Unigene0039430;Unigene0058235;Unigene0058236;Unigene0058237;Unigene0060539;Unigene0091476	K05907+K00640+K01739+K13811+K13811+K05907+K05907+K05907+K13811+K17725
Metabolism	Metabolism of cofactors and vitamins	Pantothenate and CoA biosynthesis	10	54	0.703518	1	ko00770	Unigene0002757;Unigene0010129;Unigene0015588;Unigene0022364;Unigene0023214;Unigene0032188;Unigene0062716;Unigene0063345;Unigene0069110;Unigene0069111	K01464+K01464+K00826+K00053+K01652+K00826+K00053+K01922+K01464+K01464
Metabolism	Glycan biosynthesis and metabolism	Glycosaminoglycan degradation	6	33	0.704304	1	ko00531	Unigene0005388;Unigene0010672;Unigene0041941;Unigene0053095;Unigene0055527;Unigene0065997	K10532+K12373+K07964+K12373+K10532+K12373
Metabolism	Amino acid metabolism	Glycine, serine and threonine metabolism	22	116	0.709959	1	ko00260	Unigene0004829;Unigene0011758;Unigene0014907;Unigene0017102;Unigene0019922;Unigene0024413;Unigene0036885;Unigene0037782;Unigene0037783;Unigene0037784;Unigene0043890;Unigene0044659;Unigene0047475;Unigene0049616;Unigene0049709;Unigene0051493;Unigene0061735;Unigene0066057;Unigene0066059;Unigene0075529;Unigene0081199;Unigene0088896	K15919+K00276+K00281+K00058+K00058+K15919+K15893+K00130+K00130+K00130+K15633+K00600+K01733+K14272+K00827+K00605+K00276+K00382+K00382+K00281+K02437+K00281
Metabolism	Metabolism of terpenoids and polyketides	Terpenoid backbone biosynthesis	23	124	0.753193	1	ko00900	Unigene0020520;Unigene0023098;Unigene0024040;Unigene0026138;Unigene0037309;Unigene0049319;Unigene0051153;Unigene0053321;Unigene0053570;Unigene0057681;Unigene0058201;Unigene0058202;Unigene0058203;Unigene0058871;Unigene0061884;Unigene0063936;Unigene0063938;Unigene0064129;Unigene0066062;Unigene0072804;Unigene0073329;Unigene0073461;Unigene0087799	K01662+K15889+K00626+K00626+K05356+K10960+K00099+K00021+K00787+K15892+K01662+K01662+K01662+K00919+K12742+K00099+K00099+K00938+K00626+K01641+K00021+K05356+K00626
Metabolism	Lipid metabolism	Linoleic acid metabolism	4	25	0.790079	1	ko00591	Unigene0000287;Unigene0013036;Unigene0042289;Unigene0050419	K15718+K15718+K01047+K07409
Metabolism	Amino acid metabolism	Valine, leucine and isoleucine biosynthesis	5	31	0.797684	1	ko00290	Unigene0015588;Unigene0022364;Unigene0023214;Unigene0032188;Unigene0062716	K00826+K00053+K01652+K00826+K00053
Genetic Information Processing	Transcription	Spliceosome	97	506	0.816665	1	ko03040	Unigene0000531;Unigene0001273;Unigene0004175;Unigene0006208;Unigene0006487;Unigene0007432;Unigene0008570;Unigene0008571;Unigene0008572;Unigene0008573;Unigene0008574;Unigene0008575;Unigene0008576;Unigene0008577;Unigene0008578;Unigene0008580;Unigene0008581;Unigene0008582;Unigene0008583;Unigene0008585;Unigene0008586;Unigene0008587;Unigene0010064;Unigene0011131;Unigene0012086;Unigene0012351;Unigene00…	K03283+K12837+K03283+K12891+K03283+K12890+K03283+K03283+K03283+K03283+K03283+K03283+K03283+K03283+K03283+K03283+K03283+K03283+K03283+K03283+K03283+K03283+K03283+K03283+K03283+K03283+K03283+K03283+K03283+K03283+K03283+K12896+K13025+K03283+K12823+K12812+K03283+K03283+K12823+K03283+K12836+K12877+K11087+K03283+K03283+K03283+K03283+K03283+K12893+K03283+K12837+K12896+K12896+K03283+K03283+K03283+K03283+…
Metabolism	Metabolism of terpenoids and polyketides	Brassinosteroid biosynthesis	5	32	0.82059	1	ko00905	Unigene0013008;Unigene0029016;Unigene0037908;Unigene0052134;Unigene0062597	K09590+K12637+K15639+K15639+K20623
Metabolism	Glycan biosynthesis and metabolism	Other glycan degradation	8	49	0.822191	1	ko00511	Unigene0010672;Unigene0017178;Unigene0019936;Unigene0021025;Unigene0027178;Unigene0035587;Unigene0053095;Unigene0065997	K12373+K01191+K01191+K01191+K01191+K01444+K12373+K12373
Metabolism	Metabolism of cofactors and vitamins	Thiamine metabolism	8	49	0.822191	1	ko00730	Unigene0014521;Unigene0020520;Unigene0020676;Unigene0049226;Unigene0052325;Unigene0058201;Unigene0058202;Unigene0058203	K06928+K01662+K18278+K00939+K00939+K01662+K01662+K01662
Metabolism	Biosynthesis of other secondary metabolites	Glucosinolate biosynthesis	2	15	0.847761	1	ko00966	Unigene0015588;Unigene0032188	K00826+K00826
Genetic Information Processing	Folding, sorting and degradation	Sulfur relay system	2	15	0.847761	1	ko04122	Unigene0045143;Unigene0077261	K14168+K14168
Metabolism	Carbohydrate metabolism	Galactose metabolism	26	148	0.850889	1	ko00052	Unigene0000204;Unigene0001320;Unigene0008897;Unigene0013442;Unigene0016486;Unigene0017228;Unigene0017229;Unigene0017735;Unigene0024111;Unigene0024415;Unigene0026157;Unigene0033713;Unigene0035716;Unigene0037653;Unigene0038450;Unigene0043126;Unigene0054736;Unigene0056366;Unigene0058030;Unigene0063138;Unigene0064830;Unigene0065535;Unigene0066768;Unigene0071526;Unigene0080112;Unigene0081169	K12447+K00963+K12447+K00963+K01193+K00844+K00844+K21071+K12447+K18819+K12447+K00011+K00963+K06617+K06617+K06617+K06611+K12447+K00844+K12447+K01193+K07407+K01785+K07407+K01187+K01835
Metabolism	Energy metabolism	Oxidative phosphorylation	79	422	0.85708	1	ko00190	Unigene0001524;Unigene0001552;Unigene0002908;Unigene0003651;Unigene0004165;Unigene0004473;Unigene0004628;Unigene0005319;Unigene0005646;Unigene0005761;Unigene0007673;Unigene0008371;Unigene0009136;Unigene0013857;Unigene0013883;Unigene0014083;Unigene0014902;Unigene0017319;Unigene0020008;Unigene0021613;Unigene0022293;Unigene0023917;Unigene0024348;Unigene0025410;Unigene0025903;Unigene0027224;Unigene00…	K02258+K01507+K02155+K00235+K00234+K00235+K02132+K01535+K00234+K02267+K01535+K01507+K02128+K02133+K02132+K02110+K03935+K00412+K03942+K02115+K03942+K02133+K00234+K02147+K02154+K02146+K02146+K02137+K03942+K03942+K03942+K01507+K02267+K02133+K01507+K01507+K00234+K00234+K00235+K02267+K02113+K03942+K02111+K02134+K02115+K02115+K03934+K03934+K03940+K01535+K02133+K02133+K01507+K02110+K00235+K01535+K02133+…
Metabolism	Metabolism of cofactors and vitamins	One carbon pool by folate	6	40	0.862429	1	ko00670	Unigene0024403;Unigene0024405;Unigene0044659;Unigene0051493;Unigene0055352;Unigene0081282	K00602+K00602+K00600+K00605+K00297+K00601
Metabolism	Metabolism of cofactors and vitamins	Ubiquinone and other terpenoid-quinone biosynthesis	10	63	0.865613	1	ko00130	Unigene0002021;Unigene0013522;Unigene0015973;Unigene0016124;Unigene0025858;Unigene0028392;Unigene0028901;Unigene0084608;Unigene0084913;Unigene0084945	K03809+K02548+K01904+K00815+K03809+K00815+K03809+K03809+K03809+K00457
Metabolism	Metabolism of other amino acids	Cyanoamino acid metabolism	17	104	0.890119	1	ko00460	Unigene0001607;Unigene0005748;Unigene0007148;Unigene0026685;Unigene0026686;Unigene0034217;Unigene0037015;Unigene0044659;Unigene0055492;Unigene0056318;Unigene0058200;Unigene0058534;Unigene0066455;Unigene0070409;Unigene0073779;Unigene0073781;Unigene0073782	K01188+K18592+K01455+K05350+K05350+K01188+K08248+K00600+K01188+K05350+K05349+K01455+K18592+K18592+K01188+K01188+K01188
Metabolism	Metabolism of cofactors and vitamins	Vitamin B6 metabolism	3	24	0.899765	1	ko00750	Unigene0026398;Unigene0047475;Unigene0048413	K06215+K01733+K00275
Metabolism	Metabolism of cofactors and vitamins	Lipoic acid metabolism	1	10	0.901279	1	ko00785	Unigene0037982	K03644
Genetic Information Processing	Replication and repair	Base excision repair	9	62	0.917477	1	ko03410	Unigene0013658;Unigene0038055;Unigene0039269;Unigene0052258;Unigene0059009;Unigene0063166;Unigene0067117;Unigene0073398;Unigene0085180	K10798+K10801+K02326+K01246+K01246+K10747+K03504+K10747+K10802
Metabolism	Biosynthesis of other secondary metabolites	Stilbenoid, diarylheptanoid and gingerol biosynthesis	3	26	0.927618	1	ko00945	Unigene0004415;Unigene0037718;Unigene0042911	K13065+K13065+K13065
Metabolism	Glycan biosynthesis and metabolism	Other types of O-glycan biosynthesis	6	46	0.935131	1	ko00514	Unigene0008772;Unigene0014638;Unigene0020132;Unigene0048062;Unigene0064170;Unigene0073837	K09667+K09667+K20782+K03691+K09667+K09667
Metabolism	Carbohydrate metabolism	Amino sugar and nucleotide sugar metabolism	44	262	0.95251	1	ko00520	Unigene0000204;Unigene0001320;Unigene0008897;Unigene0010672;Unigene0012523;Unigene0013420;Unigene0013442;Unigene0015398;Unigene0015479;Unigene0015639;Unigene0016826;Unigene0017228;Unigene0017229;Unigene0018655;Unigene0024111;Unigene0026157;Unigene0029652;Unigene0030386;Unigene0033274;Unigene0035716;Unigene0037597;Unigene0046675;Unigene0048476;Unigene0052086;Unigene0053095;Unigene0054588;Unigene00…	K12447+K00963+K12447+K12373+K15920+K08679+K00963+K00975+K08679+K01183+K12449+K00844+K00844+K00820+K12447+K12447+K20547+K01183+K00770+K00963+K00012+K13648+K01711+K01183+K12373+K20547+K12447+K00844+K01183+K13379+K08678+K08678+K12447+K00975+K00975+K12373+K12448+K13648+K01183+K01810+K01835+K01810+K01810+K01183
Genetic Information Processing	Translation	RNA transport	77	438	0.956158	1	ko03013	Unigene0001262;Unigene0004832;Unigene0010026;Unigene0010027;Unigene0010028;Unigene0010029;Unigene0010032;Unigene0010033;Unigene0010034;Unigene0013043;Unigene0013625;Unigene0014043;Unigene0014952;Unigene0016656;Unigene0017420;Unigene0017912;Unigene0018408;Unigene0020982;Unigene0022613;Unigene0023485;Unigene0025105;Unigene0029458;Unigene0033546;Unigene0033547;Unigene0034545;Unigene0039159;Unigene00…	K03257+K03231+K03231+K03231+K03231+K03231+K03231+K03231+K03231+K07936+K03237+K03113+K14288+K03231+K13025+K03231+K14004+K12812+K03236+K03236+K14326+K03254+K03236+K03236+K07936+K03113+K03113+K03113+K03113+K03231+K03231+K03113+K14294+K12877+K13174+K03537+K03231+K03231+K03231+K03260+K14292+K03231+K03231+K03251+K03257+K03257+K13025+K13025+K03257+K03257+K03257+K14288+K14315+K14293+K03259+K03231+K03231+…
Metabolism	Lipid metabolism	Ether lipid metabolism	6	49	0.956651	1	ko00565	Unigene0005925;Unigene0042289;Unigene0043707;Unigene0050950;Unigene0067645;Unigene0084527	K01114+K01047+K01115+K01115+K01114+K01115
Metabolism	Metabolism of cofactors and vitamins	Folate biosynthesis	5	43	0.959368	1	ko00790	Unigene0021626;Unigene0033713;Unigene0034380;Unigene0051289;Unigene0068810	K01495+K00011+K01724+K20457+K14652
Metabolism	Carbohydrate metabolism	C5-Branched dibasic acid metabolism	1	15	0.96901	1	ko00660	Unigene0023214	K01652
Metabolism	Carbohydrate metabolism	Starch and sucrose metabolism	43	270	0.980879	1	ko00500	Unigene0001320;Unigene0001607;Unigene0008973;Unigene0013442;Unigene0015398;Unigene0016486;Unigene0017228;Unigene0017229;Unigene0017956;Unigene0026685;Unigene0026686;Unigene0028045;Unigene0034217;Unigene0035716;Unigene0037535;Unigene0044965;Unigene0053205;Unigene0055492;Unigene0056318;Unigene0057421;Unigene0057422;Unigene0057423;Unigene0057879;Unigene0058030;Unigene0058200;Unigene0058760;Unigene00…	K00963+K01188+K00700+K00963+K00975+K01193+K00844+K00844+K00688+K05350+K05350+K16055+K01188+K00963+K01179+K00696+K01087+K01188+K05350+K01087+K01087+K01087+K13679+K00844+K05349+K13679+K01179+K00975+K00975+K01179+K01193+K01087+K16055+K16055+K01188+K01188+K01188+K01187+K01810+K01835+K01810+K01810+K01176
Metabolism	Metabolism of cofactors and vitamins	Riboflavin metabolism	2	26	0.98117	1	ko00740	Unigene0038906;Unigene0068810	K14379+K14652
Metabolism	Nucleotide metabolism	Pyrimidine metabolism	46	291	0.986185	1	ko00240	Unigene0000302;Unigene0002416;Unigene0002757;Unigene0003438;Unigene0004348;Unigene0004735;Unigene0005133;Unigene0007633;Unigene0009621;Unigene0010129;Unigene0010795;Unigene0018912;Unigene0019056;Unigene0027437;Unigene0027438;Unigene0028272;Unigene0033408;Unigene0034540;Unigene0039269;Unigene0040017;Unigene0049944;Unigene0053369;Unigene0054049;Unigene0054395;Unigene0057756;Unigene0062273;Unigene00…	K01520+K01510+K01464+K00876+K03006+K03006+K00940+K03006+K13800+K01464+K03024+K03010+K03006+K00940+K00940+K03043+K03006+K00761+K02326+K00940+K03006+K01937+K09903+K03006+K03006+K03006+K03046+K01937+K13800+K03504+K02320+K00876+K00876+K00876+K01464+K01464+K01937+K03006+K01081+K01520+K00940+K16904+K03019+K03013+K01081+K10807
Metabolism	Glycan biosynthesis and metabolism	N-Glycan biosynthesis	9	77	0.986663	1	ko00510	Unigene0013753;Unigene0014224;Unigene0021446;Unigene0028095;Unigene0064593;Unigene0069379;Unigene0071198;Unigene0084939;Unigene0093677	K00737+K00736+K05546+K07151+K00737+K07151+K07151+K01230+K12666
Metabolism	Metabolism of cofactors and vitamins	Nicotinate and nicotinamide metabolism	5	51	0.988048	1	ko00760	Unigene0001945;Unigene0029720;Unigene0075558;Unigene0079420;Unigene0092197	K00278+K18551+K00278+K01081+K01081
Genetic Information Processing	Folding, sorting and degradation	Protein export	12	98	0.989611	1	ko03060	Unigene0003595;Unigene0006593;Unigene0011630;Unigene0014368;Unigene0019119;Unigene0020172;Unigene0020764;Unigene0020765;Unigene0030582;Unigene0055685;Unigene0073313;Unigene0086933	K09490+K09490+K09490+K10956+K09490+K09490+K13431+K13431+K12946+K03217+K09490+K09490
Genetic Information Processing	Folding, sorting and degradation	Proteasome	19	141	0.989939	1	ko03050	Unigene0004132;Unigene0005031;Unigene0010788;Unigene0017225;Unigene0024968;Unigene0026200;Unigene0028216;Unigene0030052;Unigene0033449;Unigene0038349;Unigene0038683;Unigene0061154;Unigene0061649;Unigene0082541;Unigene0083096;Unigene0089784;Unigene0090360;Unigene0090871;Unigene0090921	K03061+K03028+K03029+K02731+K03065+K03061+K02727+K03032+K02736+K03028+K03064+K03038+K03061+K02739+K03037+K02732+K03035+K02729+K02735
Environmental Information Processing	Signal transduction	Plant hormone signal transduction	67	412	0.99099	1	ko04075	Unigene0000587;Unigene0001425;Unigene0001628;Unigene0003468;Unigene0004973;Unigene0005766;Unigene0007117;Unigene0007242;Unigene0007571;Unigene0009111;Unigene0009829;Unigene0013082;Unigene0013140;Unigene0015807;Unigene0016284;Unigene0017379;Unigene0030601;Unigene0030773;Unigene0031194;Unigene0031776;Unigene0032250;Unigene0032454;Unigene0034544;Unigene0034636;Unigene0034692;Unigene0035396;Unigene00…	K14497+K14431+K14488+K14488+K14484+K14505+K14487+K14485+K13449+K13449+K13449+K14492+K14488+K14492+K14484+K14512+K12126+K14488+K14497+K14488+K14488+K14504+K14488+K14488+K13464+K13464+K14488+K14504+K14484+K14488+K14504+K14488+K14488+K14432+K14484+K13449+K14488+K14497+K14515+K14484+K14484+K14484+K14486+K13464+K14496+K14496+K14491+K14491+K14503+K14486+K14506+K14497+K14431+K14488+K14431+K14431+K14486+…
Genetic Information Processing	Transcription	RNA polymerase	16	125	0.992016	1	ko03020	Unigene0004348;Unigene0004735;Unigene0007633;Unigene0010795;Unigene0018912;Unigene0019056;Unigene0028272;Unigene0033408;Unigene0049944;Unigene0054395;Unigene0057756;Unigene0062273;Unigene0065558;Unigene0075475;Unigene0087564;Unigene0091865	K03006+K03006+K03006+K03024+K03010+K03006+K03043+K03006+K03006+K03006+K03006+K03006+K03046+K03006+K03019+K03013
Cellular Processes	Transport and catabolism	Phagosome	31	215	0.992991	1	ko04145	Unigene0002908;Unigene0003151;Unigene0007553;Unigene0011660;Unigene0012706;Unigene0012852;Unigene0014368;Unigene0014402;Unigene0015356;Unigene0019872;Unigene0019979;Unigene0020896;Unigene0023820;Unigene0023895;Unigene0025410;Unigene0025903;Unigene0027224;Unigene0027225;Unigene0031410;Unigene0035557;Unigene0037333;Unigene0048146;Unigene0049452;Unigene0064276;Unigene0077514;Unigene0077950;Unigene00…	K02155+K07375+K05692+K07374+K05692+K05692+K10956+K05692+K05692+K07375+K08054+K10414+K04392+K05692+K02147+K02154+K02146+K02146+K04392+K07375+K07374+K05692+K07375+K07374+K02155+K04392+K02155+K02145+K04392+K08054+K07897
Genetic Information Processing	Replication and repair	DNA replication	16	129	0.994957	1	ko03030	Unigene0014006;Unigene0014216;Unigene0039269;Unigene0043846;Unigene0043939;Unigene0049476;Unigene0050494;Unigene0050764;Unigene0055009;Unigene0055836;Unigene0063166;Unigene0064977;Unigene0067117;Unigene0068176;Unigene0070861;Unigene0073398	K07466+K02212+K02326+K02212+K07466+K02542+K10756+K07466+K07466+K02210+K10747+K10756+K03504+K02320+K02212+K10747
Genetic Information Processing	Folding, sorting and degradation	SNARE interactions in vesicular transport	8	79	0.996	1	ko04130	Unigene0036461;Unigene0036462;Unigene0043732;Unigene0045851;Unigene0045852;Unigene0054737;Unigene0074161;Unigene0088605	K08486+K08486+K08486+K08486+K08486+K08503+K08496+K08515
Metabolism	Carbohydrate metabolism	Inositol phosphate metabolism	14	120	0.99673	1	ko00562	Unigene0005862;Unigene0005925;Unigene0014236;Unigene0019698;Unigene0020456;Unigene0026718;Unigene0035917;Unigene0038065;Unigene0045554;Unigene0052306;Unigene0063285;Unigene0067645;Unigene0071238;Unigene0077373	K01803+K01114+K00140+K00010+K03103+K10047+K01858+K00469+K01858+K10047+K01803+K01114+K21797+K00469
Metabolism	Lipid metabolism	Glycerophospholipid metabolism	24	182	0.996829	1	ko00564	Unigene0005925;Unigene0011467;Unigene0011545;Unigene0014275;Unigene0022737;Unigene0034985;Unigene0039916;Unigene0039917;Unigene0042289;Unigene0042812;Unigene0043707;Unigene0049914;Unigene0050950;Unigene0051890;Unigene0052234;Unigene0052287;Unigene0055180;Unigene0059193;Unigene0059194;Unigene0062099;Unigene0062100;Unigene0067645;Unigene0084527;Unigene0089842	K01114+K00901+K00968+K00981+K14286+K06130+K00968+K00968+K01047+K13508+K01115+K00006+K01115+K13509+K00655+K06129+K01126+K08730+K08730+K13508+K13508+K01114+K01115+K18696
Metabolism	Lipid metabolism	Sphingolipid metabolism	6	68	0.99753	1	ko00600	Unigene0045844;Unigene0065513;Unigene0065535;Unigene0071526;Unigene0083047;Unigene0084413	K00654+K04714+K07407+K07407+K12349+K12349
Metabolism	Glycan biosynthesis and metabolism	Glycosylphosphatidylinositol(GPI)-anchor biosynthesis	4	53	0.997586	1	ko00563	Unigene0030596;Unigene0039286;Unigene0073602;Unigene0090189	K03858+K03858+K05288+K05283
Metabolism	Nucleotide metabolism	Purine metabolism	58	381	0.997608	1	ko00230	Unigene0002416;Unigene0004348;Unigene0004735;Unigene0005133;Unigene0006866;Unigene0007633;Unigene0010795;Unigene0014521;Unigene0014853;Unigene0018912;Unigene0019056;Unigene0022892;Unigene0024403;Unigene0024405;Unigene0027437;Unigene0027438;Unigene0028272;Unigene0028707;Unigene0029147;Unigene0033408;Unigene0038913;Unigene0039269;Unigene0039430;Unigene0040017;Unigene0040393;Unigene0041968;Unigene00…	K01510+K03006+K03006+K00940+K13484+K03006+K03024+K06928+K00873+K03010+K03006+K00948+K00602+K00602+K00940+K00940+K03043+K13811+K00873+K03006+K00088+K02326+K13811+K00940+K00759+K13755+K00939+K03006+K00873+K00939+K03006+K00856+K00759+K03006+K00873+K13811+K03006+K03046+K03504+K02320+K00873+K01756+K03006+K00873+K01081+K00948+K01835+K00601+K00940+K00856+K00764+K03019+K00365+K01939+K00873+K03013+K01081+…
Metabolism	Amino acid metabolism	Phenylalanine, tyrosine and tryptophan biosynthesis	8	86	0.998603	1	ko00400	Unigene0016124;Unigene0028392;Unigene0036093;Unigene0060174;Unigene0064334;Unigene0066739;Unigene0091150;Unigene0092191	K00815+K00815+K01626+K01657+K01657+K00891+K14454+K00811
Genetic Information Processing	Replication and repair	Mismatch repair	10	102	0.998965	1	ko03430	Unigene0014006;Unigene0034208;Unigene0043939;Unigene0050494;Unigene0050764;Unigene0055009;Unigene0063166;Unigene0064977;Unigene0067117;Unigene0073398	K07466+K08737+K07466+K10756+K07466+K07466+K10747+K10756+K03504+K10747
Metabolism	Metabolism of cofactors and vitamins	Porphyrin and chlorophyll metabolism	7	81	0.999013	1	ko00860	Unigene0037788;Unigene0039763;Unigene0049319;Unigene0050505;Unigene0061803;Unigene0062678;Unigene0063958	K22013+K08099+K10960+K22013+K03405+K02492+K03403
Cellular Processes	Transport and catabolism	Autophagy - other eukaryotes	9	103	0.999696	1	ko04136	Unigene0017009;Unigene0039648;Unigene0039650;Unigene0039651;Unigene0039652;Unigene0066074;Unigene0075216;Unigene0083511;Unigene0084087	K08330+K08341+K08341+K08341+K08341+K08341+K04382+K08341+K04382
Environmental Information Processing	Signal transduction	Phosphatidylinositol signaling system	14	140	0.999772	1	ko04070	Unigene0011467;Unigene0013440;Unigene0014275;Unigene0023992;Unigene0024121;Unigene0024272;Unigene0026718;Unigene0026954;Unigene0041876;Unigene0052306;Unigene0071238;Unigene0077466;Unigene0080545;Unigene0088697	K00901+K02183+K00981+K02183+K02183+K02183+K10047+K02183+K02183+K10047+K21797+K02183+K02183+K02183
Environmental Information Processing	Membrane transport	ABC transporters	12	128	0.999825	1	ko02010	Unigene0014742;Unigene0016295;Unigene0016940;Unigene0034046;Unigene0037091;Unigene0043248;Unigene0063428;Unigene0073538;Unigene0073539;Unigene0074184;Unigene0075547;Unigene0076166	K05643+K05643+K05658+K05658+K05681+K05658+K05643+K05658+K05658+K05658+K05666+K05658
Genetic Information Processing	Folding, sorting and degradation	Ubiquitin mediated proteolysis	37	304	0.999969	1	ko04120	Unigene0001417;Unigene0002300;Unigene0005044;Unigene0008682;Unigene0009513;Unigene0011435;Unigene0016410;Unigene0019048;Unigene0025979;Unigene0031979;Unigene0035732;Unigene0036483;Unigene0037327;Unigene0037351;Unigene0042917;Unigene0044825;Unigene0048113;Unigene0048114;Unigene0048387;Unigene0048867;Unigene0049207;Unigene0049208;Unigene0049576;Unigene0059795;Unigene0062733;Unigene0066489;Unigene00…	K06688+K10143+K03351+K10144+K04706+K03347+K03363+K10583+K10592+K03364+K03868+K03869+K06689+K06688+K06688+K10143+K03347+K03347+K04506+K03363+K03094+K03094+K04706+K10144+K03347+K10144+K10581+K10143+K03869+K03869+K10590+K03094+K03178+K03364+K10604+K03094+K06689
Genetic Information Processing	Folding, sorting and degradation	RNA degradation	35	292	0.99997	1	ko03018	Unigene0003076;Unigene0003341;Unigene0014257;Unigene0014462;Unigene0014717;Unigene0016290;Unigene0017678;Unigene0021219;Unigene0021587;Unigene0025172;Unigene0029674;Unigene0030454;Unigene0030455;Unigene0030772;Unigene0030778;Unigene0037904;Unigene0044312;Unigene0048265;Unigene0049845;Unigene0049846;Unigene0049847;Unigene0058732;Unigene0070318;Unigene0070319;Unigene0071093;Unigene0071420;Unigene00…	K04043+K12598+K12598+K04043+K14442+K04077+K01689+K04077+K04043+K01689+K12591+K01689+K01689+K04043+K04043+K12598+K07573+K12608+K04043+K04043+K04043+K04043+K12608+K12608+K04077+K12619+K04043+K12617+K13126+K13126+K12614+K01689+K12603+K12622+K04077
Genetic Information Processing	Replication and repair	Nucleotide excision repair	12	158	0.999998	1	ko03420	Unigene0014006;Unigene0035732;Unigene0039269;Unigene0043939;Unigene0048301;Unigene0050494;Unigene0050764;Unigene0055009;Unigene0063166;Unigene0064977;Unigene0067117;Unigene0073398	K07466+K03868+K02326+K07466+K10849+K10756+K07466+K07466+K10747+K10756+K03504+K10747
Genetic Information Processing	Replication and repair	Homologous recombination	8	128	0.999999	1	ko03440	Unigene0013937;Unigene0014006;Unigene0043939;Unigene0048844;Unigene0050764;Unigene0051547;Unigene0055009;Unigene0067117	K08775+K07466+K07466+K10875+K07466+K11864+K07466+K03504
Genetic Information Processing	Transcription	Basal transcription factors	3	87	1	1	ko03022	Unigene0039719;Unigene0072418;Unigene0082908	K14651+K03137+K03134
Genetic Information Processing	Translation	Ribosome biogenesis in eukaryotes	13	181	1	1	ko03008	Unigene0010051;Unigene0013043;Unigene0017497;Unigene0029824;Unigene0034545;Unigene0035636;Unigene0046562;Unigene0059647;Unigene0061560;Unigene0064026;Unigene0068200;Unigene0071420;Unigene0090683	K14559+K07936+K14539+K07178+K07936+K07178+K03537+K14555+K14539+K06943+K12845+K12619+K11130
Genetic Information Processing	Translation	Aminoacyl-tRNA biosynthesis	6	129	1	1	ko00970	Unigene0018206;Unigene0064277;Unigene0071584;Unigene0073866;Unigene0073868;Unigene0088231	K02433+K01892+K01893+K01869+K01869+K01875
Genetic Information Processing	Translation	mRNA surveillance pathway	23	261	1	1	ko03015	Unigene0002163;Unigene0009097;Unigene0017420;Unigene0020982;Unigene0025105;Unigene0044948;Unigene0045343;Unigene0049223;Unigene0053709;Unigene0053824;Unigene0053932;Unigene0055922;Unigene0059972;Unigene0062839;Unigene0062840;Unigene0074975;Unigene0075216;Unigene0079992;Unigene0080101;Unigene0080107;Unigene0082914;Unigene0084087;Unigene0093298	K14396+K14396+K13025+K12812+K14326+K14294+K12877+K06100+K14411+K14405+K14376+K14409+K15542+K13025+K13025+K06100+K04382+K13126+K13126+K12883+K06269+K04382+K03267
