# Supplementary material for: Genetic studies on continuous flowering in woody plant Osmanthus fragrans
Source: Front Plant Sci. 2022 Nov 3;13:1049479. doi: 10.3389/fpls.2022.1049479 (PMC9671776; doi:10.3389/fpls.2022.1049479)
Supplement: Supplementary file 8 [file Table_5.xls]

Family	Count	Genes
ERF	164	Unigene0000131;Unigene0000196;Unigene0000627;Unigene0001297;Unigene0003650;Unigene0003737;Unigene0003763;Unigene0006213;Unigene0007115;Unigene0008436;Unigene0008437;Unigene0008438;Unigene0009517;Unigene0012148;Unigene0012281;Unigene0012889;Unigene0013148;Unigene0013954;Unigene0014948;Unigene0015538;Unigene0015685;Unigene0016013;Unigene0017821;Unigene0018058;Unigene0018314;Unigene0018987;Unigene00…
C2H2	161	Unigene0000049;Unigene0000073;Unigene0001570;Unigene0001745;Unigene0002332;Unigene0002655;Unigene0002763;Unigene0002874;Unigene0002875;Unigene0003444;Unigene0003836;Unigene0004906;Unigene0004933;Unigene0006096;Unigene0006782;Unigene0007608;Unigene0010423;Unigene0010502;Unigene0011077;Unigene0011134;Unigene0011951;Unigene0012136;Unigene0012256;Unigene0013487;Unigene0013539;Unigene0015092;Unigene00…
bHLH	157	Unigene0000206;Unigene0001899;Unigene0001993;Unigene0003115;Unigene0003999;Unigene0004364;Unigene0004770;Unigene0006574;Unigene0007099;Unigene0008375;Unigene0011352;Unigene0012372;Unigene0012736;Unigene0012853;Unigene0013166;Unigene0013513;Unigene0014750;Unigene0015549;Unigene0017002;Unigene0018368;Unigene0018532;Unigene0019411;Unigene0021612;Unigene0021993;Unigene0022270;Unigene0026131;Unigene00…
NAC	103	Unigene0000306;Unigene0000753;Unigene0002209;Unigene0005873;Unigene0006085;Unigene0006112;Unigene0008232;Unigene0009132;Unigene0009424;Unigene0010109;Unigene0010146;Unigene0014781;Unigene0015088;Unigene0015142;Unigene0015183;Unigene0015302;Unigene0015357;Unigene0015505;Unigene0015666;Unigene0016568;Unigene0016827;Unigene0020236;Unigene0020640;Unigene0020641;Unigene0022904;Unigene0025123;Unigene00…
MYB	100	Unigene0000092;Unigene0000172;Unigene0000355;Unigene0000804;Unigene0000981;Unigene0002573;Unigene0003293;Unigene0004663;Unigene0005358;Unigene0005641;Unigene0005887;Unigene0006383;Unigene0006620;Unigene0007282;Unigene0008296;Unigene0008549;Unigene0008627;Unigene0009010;Unigene0013901;Unigene0014015;Unigene0017439;Unigene0018095;Unigene0022388;Unigene0022577;Unigene0024249;Unigene0024500;Unigene00…
WRKY	96	Unigene0001713;Unigene0002128;Unigene0004096;Unigene0005793;Unigene0006003;Unigene0007690;Unigene0008158;Unigene0008614;Unigene0008719;Unigene0008996;Unigene0009263;Unigene0010900;Unigene0012785;Unigene0013346;Unigene0014630;Unigene0014895;Unigene0016559;Unigene0019720;Unigene0022431;Unigene0026167;Unigene0026528;Unigene0026529;Unigene0027121;Unigene0027385;Unigene0030261;Unigene0033283;Unigene00…
MYB_related	95	Unigene0001046;Unigene0003025;Unigene0004095;Unigene0004676;Unigene0007190;Unigene0007348;Unigene0008479;Unigene0008972;Unigene0009656;Unigene0009806;Unigene0014062;Unigene0014517;Unigene0017606;Unigene0019383;Unigene0021616;Unigene0022387;Unigene0022928;Unigene0023534;Unigene0023625;Unigene0023800;Unigene0023890;Unigene0024284;Unigene0024285;Unigene0024499;Unigene0024820;Unigene0028389;Unigene00…
bZIP	89	Unigene0000387;Unigene0000388;Unigene0001425;Unigene0002699;Unigene0003404;Unigene0008606;Unigene0009149;Unigene0009179;Unigene0011648;Unigene0012645;Unigene0012845;Unigene0015712;Unigene0017021;Unigene0020027;Unigene0021204;Unigene0026073;Unigene0030103;Unigene0030104;Unigene0031190;Unigene0031385;Unigene0031386;Unigene0032033;Unigene0032069;Unigene0032153;Unigene0032324;Unigene0033919;Unigene00…
C3H	74	Unigene0000202;Unigene0003929;Unigene0008064;Unigene0010993;Unigene0012839;Unigene0013552;Unigene0013832;Unigene0014537;Unigene0014898;Unigene0016286;Unigene0020109;Unigene0023636;Unigene0026155;Unigene0030069;Unigene0034895;Unigene0035724;Unigene0036271;Unigene0037665;Unigene0038734;Unigene0039282;Unigene0039662;Unigene0040750;Unigene0043545;Unigene0044522;Unigene0045932;Unigene0046512;Unigene00…
FAR1	71	Unigene0001753;Unigene0002173;Unigene0002183;Unigene0002184;Unigene0002464;Unigene0002466;Unigene0002930;Unigene0004390;Unigene0007681;Unigene0009209;Unigene0009983;Unigene0010971;Unigene0011075;Unigene0014583;Unigene0014747;Unigene0015015;Unigene0018765;Unigene0020294;Unigene0020295;Unigene0021187;Unigene0021363;Unigene0022023;Unigene0029708;Unigene0034997;Unigene0035313;Unigene0035411;Unigene00…
GRAS	56	Unigene0009821;Unigene0011699;Unigene0011883;Unigene0012278;Unigene0012794;Unigene0014566;Unigene0018538;Unigene0027589;Unigene0029533;Unigene0029534;Unigene0030149;Unigene0035695;Unigene0037014;Unigene0038490;Unigene0039508;Unigene0041073;Unigene0041761;Unigene0042740;Unigene0042886;Unigene0043283;Unigene0043889;Unigene0044111;Unigene0044799;Unigene0044801;Unigene0044978;Unigene0044979;Unigene00…
Dof	53	Unigene0004344;Unigene0006708;Unigene0007783;Unigene0028410;Unigene0028836;Unigene0030570;Unigene0030571;Unigene0033256;Unigene0034359;Unigene0034737;Unigene0035375;Unigene0035429;Unigene0035513;Unigene0036941;Unigene0036942;Unigene0039391;Unigene0039392;Unigene0040528;Unigene0041415;Unigene0041416;Unigene0042204;Unigene0042205;Unigene0042206;Unigene0042207;Unigene0043582;Unigene0043583;Unigene00…
G2-like	51	Unigene0000650;Unigene0004601;Unigene0004789;Unigene0005131;Unigene0009070;Unigene0009302;Unigene0010350;Unigene0010421;Unigene0011931;Unigene0024592;Unigene0026451;Unigene0027508;Unigene0032294;Unigene0035020;Unigene0038718;Unigene0038719;Unigene0043364;Unigene0043816;Unigene0043817;Unigene0044138;Unigene0045538;Unigene0046777;Unigene0047026;Unigene0047220;Unigene0049519;Unigene0051186;Unigene00…
B3	48	Unigene0001084;Unigene0001939;Unigene0004624;Unigene0005437;Unigene0006361;Unigene0006940;Unigene0009002;Unigene0012938;Unigene0014281;Unigene0015132;Unigene0015319;Unigene0017890;Unigene0023580;Unigene0023581;Unigene0024955;Unigene0024956;Unigene0030933;Unigene0033008;Unigene0033257;Unigene0037299;Unigene0037443;Unigene0038028;Unigene0046404;Unigene0046620;Unigene0047029;Unigene0047588;Unigene00…
HD-ZIP	48	Unigene0000240;Unigene0002786;Unigene0003179;Unigene0006132;Unigene0010732;Unigene0014338;Unigene0014978;Unigene0018079;Unigene0027348;Unigene0032627;Unigene0034898;Unigene0037077;Unigene0038559;Unigene0039584;Unigene0041153;Unigene0043299;Unigene0043300;Unigene0043301;Unigene0043589;Unigene0043590;Unigene0045052;Unigene0046595;Unigene0046598;Unigene0048683;Unigene0053194;Unigene0056071;Unigene00…
TCP	47	Unigene0000290;Unigene0002895;Unigene0009515;Unigene0010232;Unigene0011342;Unigene0011914;Unigene0012754;Unigene0012756;Unigene0013756;Unigene0015251;Unigene0015267;Unigene0015522;Unigene0016224;Unigene0017023;Unigene0031010;Unigene0031011;Unigene0031177;Unigene0034802;Unigene0034803;Unigene0036236;Unigene0036378;Unigene0036379;Unigene0036484;Unigene0037100;Unigene0037102;Unigene0039105;Unigene00…
Trihelix	44	Unigene0003101;Unigene0003270;Unigene0009508;Unigene0010572;Unigene0012026;Unigene0014524;Unigene0021982;Unigene0029646;Unigene0033501;Unigene0038078;Unigene0038079;Unigene0038818;Unigene0039070;Unigene0040558;Unigene0040864;Unigene0041235;Unigene0042210;Unigene0043141;Unigene0044340;Unigene0044341;Unigene0044643;Unigene0046216;Unigene0046391;Unigene0047287;Unigene0047288;Unigene0052024;Unigene00…
LBD	44	Unigene0000499;Unigene0002372;Unigene0003173;Unigene0003259;Unigene0011550;Unigene0015165;Unigene0015607;Unigene0017552;Unigene0024467;Unigene0024468;Unigene0024469;Unigene0025291;Unigene0025292;Unigene0028485;Unigene0028608;Unigene0029706;Unigene0030503;Unigene0031050;Unigene0033331;Unigene0033969;Unigene0034656;Unigene0036670;Unigene0036839;Unigene0036840;Unigene0037034;Unigene0037035;Unigene00…
HSF	39	Unigene0005376;Unigene0006567;Unigene0011746;Unigene0016803;Unigene0019451;Unigene0019744;Unigene0031098;Unigene0035091;Unigene0035092;Unigene0041802;Unigene0043769;Unigene0044909;Unigene0044910;Unigene0044951;Unigene0044952;Unigene0045118;Unigene0045119;Unigene0045160;Unigene0046034;Unigene0046283;Unigene0047835;Unigene0047836;Unigene0047837;Unigene0047907;Unigene0047908;Unigene0048054;Unigene00…
GATA	32	Unigene0000070;Unigene0016621;Unigene0023609;Unigene0028774;Unigene0038168;Unigene0038591;Unigene0038593;Unigene0039036;Unigene0041748;Unigene0041749;Unigene0041887;Unigene0041888;Unigene0042987;Unigene0043530;Unigene0044630;Unigene0044764;Unigene0045625;Unigene0046587;Unigene0046588;Unigene0047417;Unigene0047615;Unigene0048369;Unigene0048370;Unigene0050155;Unigene0050476;Unigene0050477;Unigene00…
TALE	29	Unigene0008802;Unigene0010857;Unigene0025937;Unigene0041274;Unigene0045487;Unigene0047161;Unigene0047753;Unigene0048330;Unigene0048331;Unigene0048470;Unigene0048471;Unigene0048939;Unigene0051184;Unigene0052922;Unigene0055682;Unigene0055915;Unigene0056619;Unigene0057733;Unigene0058342;Unigene0060742;Unigene0061148;Unigene0062274;Unigene0069542;Unigene0070791;Unigene0071649;Unigene0071650;Unigene00…
SBP	28	Unigene0002990;Unigene0012190;Unigene0014411;Unigene0019455;Unigene0029008;Unigene0029009;Unigene0039892;Unigene0039893;Unigene0039981;Unigene0047186;Unigene0047187;Unigene0052625;Unigene0054828;Unigene0054829;Unigene0060340;Unigene0060341;Unigene0060342;Unigene0061325;Unigene0061326;Unigene0064272;Unigene0068021;Unigene0072842;Unigene0074495;Unigene0074496;Unigene0074497;Unigene0075840;Unigene00…
M-type	28	Unigene0000596;Unigene0002659;Unigene0006168;Unigene0006201;Unigene0006430;Unigene0007867;Unigene0010856;Unigene0015281;Unigene0016243;Unigene0016501;Unigene0029170;Unigene0030122;Unigene0041982;Unigene0041983;Unigene0043064;Unigene0044423;Unigene0045148;Unigene0045149;Unigene0051930;Unigene0055670;Unigene0061565;Unigene0061566;Unigene0065673;Unigene0066484;Unigene0072616;Unigene0073311;Unigene00…
MIKC	27	Unigene0000086;Unigene0001180;Unigene0001679;Unigene0004244;Unigene0004320;Unigene0005318;Unigene0007866;Unigene0010234;Unigene0011989;Unigene0015376;Unigene0021030;Unigene0023552;Unigene0031067;Unigene0036261;Unigene0040919;Unigene0040920;Unigene0041706;Unigene0042088;Unigene0042580;Unigene0047597;Unigene0048137;Unigene0051629;Unigene0051630;Unigene0060006;Unigene0061567;Unigene0076103;Unigene00…
HB-other	26	Unigene0004400;Unigene0005886;Unigene0013519;Unigene0015654;Unigene0020800;Unigene0023688;Unigene0024795;Unigene0026007;Unigene0026008;Unigene0028363;Unigene0029699;Unigene0038674;Unigene0057734;Unigene0064360;Unigene0064899;Unigene0066017;Unigene0068102;Unigene0072658;Unigene0082351;Unigene0083500;Unigene0089314;Unigene0089896;Unigene0089897;Unigene0052748;Unigene0080104;Unigene0080988
ARF	25	Unigene0000185;Unigene0001876;Unigene0045266;Unigene0045267;Unigene0047644;Unigene0051522;Unigene0051690;Unigene0053284;Unigene0054060;Unigene0054816;Unigene0059230;Unigene0059231;Unigene0061298;Unigene0063362;Unigene0065234;Unigene0066798;Unigene0067438;Unigene0069152;Unigene0069527;Unigene0070238;Unigene0070240;Unigene0070298;Unigene0071585;Unigene0072981;Unigene0075043
NF-YA	19	Unigene0001314;Unigene0003405;Unigene0022735;Unigene0039655;Unigene0042613;Unigene0056271;Unigene0057095;Unigene0057658;Unigene0057660;Unigene0057662;Unigene0057663;Unigene0058517;Unigene0058603;Unigene0058605;Unigene0058606;Unigene0058805;Unigene0063849;Unigene0071532;Unigene0080091
ZF-HD	18	Unigene0002723;Unigene0013821;Unigene0024059;Unigene0028720;Unigene0028911;Unigene0031882;Unigene0035002;Unigene0037445;Unigene0040889;Unigene0040908;Unigene0040909;Unigene0041434;Unigene0041816;Unigene0048077;Unigene0055283;Unigene0055386;Unigene0055387;Unigene0078222
AP2	16	Unigene0004409;Unigene0010584;Unigene0044242;Unigene0046495;Unigene0046496;Unigene0047820;Unigene0050231;Unigene0051682;Unigene0057139;Unigene0057140;Unigene0063546;Unigene0063547;Unigene0065680;Unigene0069015;Unigene0071000;Unigene0081093
WOX	16	Unigene0007470;Unigene0027823;Unigene0031017;Unigene0031617;Unigene0034791;Unigene0040562;Unigene0041785;Unigene0043668;Unigene0044064;Unigene0044065;Unigene0051210;Unigene0051211;Unigene0055546;Unigene0087741;Unigene0088016;Unigene0089964
NF-YB	16	Unigene0000698;Unigene0001760;Unigene0009050;Unigene0028368;Unigene0035194;Unigene0038741;Unigene0039269;Unigene0040397;Unigene0040680;Unigene0040681;Unigene0050447;Unigene0050448;Unigene0053325;Unigene0072098;Unigene0074657;Unigene0085113
DBB	14	Unigene0001515;Unigene0004520;Unigene0014896;Unigene0016226;Unigene0018684;Unigene0035777;Unigene0041909;Unigene0044010;Unigene0044153;Unigene0044757;Unigene0047495;Unigene0048677;Unigene0076258;Unigene0085127
CO-like	14	Unigene0010314;Unigene0032535;Unigene0039115;Unigene0043065;Unigene0043854;Unigene0044152;Unigene0044308;Unigene0046962;Unigene0047264;Unigene0047266;Unigene0051776;Unigene0059694;Unigene0059695;Unigene0060203
NF-YC	12	Unigene0000832;Unigene0010119;Unigene0010514;Unigene0012733;Unigene0015116;Unigene0037145;Unigene0044265;Unigene0049888;Unigene0049889;Unigene0058332;Unigene0060036;Unigene0060039
BES1	11	Unigene0004992;Unigene0011211;Unigene0030545;Unigene0033469;Unigene0040843;Unigene0046244;Unigene0050266;Unigene0053078;Unigene0053079;Unigene0054640;Unigene0054641
LSD	11	Unigene0006127;Unigene0008980;Unigene0008981;Unigene0008982;Unigene0010938;Unigene0055877;Unigene0055878;Unigene0056531;Unigene0056532;Unigene0057922;Unigene0063971
GRF	11	Unigene0010408;Unigene0013842;Unigene0029108;Unigene0043543;Unigene0043544;Unigene0051353;Unigene0051354;Unigene0051674;Unigene0057870;Unigene0060141;Unigene0093461
Nin-like	10	Unigene0002776;Unigene0010869;Unigene0010871;Unigene0015017;Unigene0021366;Unigene0056581;Unigene0058356;Unigene0068930;Unigene0070886;Unigene0074050
BBR-BPC	10	Unigene0045587;Unigene0045588;Unigene0053735;Unigene0053737;Unigene0053739;Unigene0055531;Unigene0055536;Unigene0064603;Unigene0065293;Unigene0071193
CPP	8	Unigene0014770;Unigene0016255;Unigene0041772;Unigene0042316;Unigene0064540;Unigene0068466;Unigene0070928;Unigene0075050
CAMTA	8	Unigene0001008;Unigene0014852;Unigene0048133;Unigene0050051;Unigene0069075;Unigene0069077;Unigene0073498;Unigene0075470
ARR-B	7	Unigene0003095;Unigene0007039;Unigene0042764;Unigene0053592;Unigene0070799;Unigene0070847;Unigene0073181
E2F/DP	7	Unigene0002481;Unigene0005636;Unigene0017391;Unigene0058558;Unigene0058559;Unigene0067250;Unigene0074202
SRS	6	Unigene0013964;Unigene0032029;Unigene0036539;Unigene0036540;Unigene0041929;Unigene0056576
GeBP	6	Unigene0006011;Unigene0023872;Unigene0029336;Unigene0039245;Unigene0047883;Unigene0063616
EIL	5	Unigene0047518;Unigene0049751;Unigene0063799;Unigene0066188;Unigene0066452
YABBY	5	Unigene0002382;Unigene0035231;Unigene0049812;Unigene0052198;Unigene0058753
S1Fa-like	4	Unigene0028482;Unigene0028483;Unigene0030889;Unigene0047693
VOZ	4	Unigene0028203;Unigene0039480;Unigene0039481;Unigene0039483
SAP	3	Unigene0011626;Unigene0048932;Unigene0048933
RAV	3	Unigene0035685;Unigene0035686;Unigene0040882
HB-PHD	3	Unigene0058747;Unigene0058750;Unigene0072461
NF-X1	2	Unigene0043264;Unigene0066321
Whirly	2	Unigene0047731;Unigene0069439
STAT	1	Unigene0039756
NZZ/SPL	1	Unigene0037648
HRT-like	1	Unigene0007013
LFY	1	Unigene0000827
Total	1990
